# Supplementary material for: Antibiotic prescribing in long-term care facilities: a qualitative, multidisciplinary investigation
Source: PubMed Central journal article supplement — BMJ Open. 2014 Nov 5;4(11):e006442. doi: 10.1136/bmjopen-2014-006442 (PMC4225237; doi:10.1136/bmjopen-2014-006442), 2014-11-05
Supplement: bmjopen-2014-006442.draft_revisions.pdf [file bmjopen-2014-006442.draft_revisions.pdf]

# BMJ Open

## Antibiotic prescribing in Long Term Care Facilities; a qualitative, multidisciplinary investigation.

|                                 |                                                                                                                                                                                                                                                                       |
|---------------------------------|-----------------------------------------------------------------------------------------------------------------------------------------------------------------------------------------------------------------------------------------------------------------------|
| Journal:                        | <i>BMJ Open</i>                                                                                                                                                                                                                                                       |
| Manuscript ID:                  | bmjopen-2014-006442                                                                                                                                                                                                                                                   |
| Article Type:                   | Research                                                                                                                                                                                                                                                              |
| Date Submitted by the Author:   | 21-Aug-2014                                                                                                                                                                                                                                                           |
| Complete List of Authors:       | Fleming, Aoife; University College Cork, School of Pharmacy<br>Bradley, Colin; University College Cork, Department of General Practice<br>Cullinan, Shane; University College Cork, School of Pharmacy<br>Byrne, Stephen; University College Cork, School of Pharmacy |
| <b>Primary Subject Heading</b>: | Infectious diseases                                                                                                                                                                                                                                                   |
| Secondary Subject Heading:      | Geriatric medicine, Health services research, Public health, Qualitative research                                                                                                                                                                                     |
| Keywords:                       | GERIATRIC MEDICINE, PUBLIC HEALTH, Public health < INFECTIOUS DISEASES, QUALITATIVE RESEARCH, Urinary tract infections < UROLOGY, Respiratory infections < THORACIC MEDICINE                                                                                          |
|                                 |                                                                                                                                                                                                                                                                       |

SCHOLARONE™  
Manuscripts

**Title:****Antibiotic prescribing in Long Term Care Facilities; a Qualitative, multidisciplinary investigation.****Keywords:**

Antimicrobial prescribing, Long-term care, Prescribing behaviour, Interviews, Theoretical Domains Framework, Behaviour Change Technique Taxonomy.

**Authors:**

Aoife Fleming, HRB PhD Scholar in Health Services Research  
School of Pharmacy  
University College Cork  
Cork  
Ireland  
[a.fleming@ucc.ie](mailto:a.fleming@ucc.ie)  
Tel: +353 21 4901690  
(Primary Author and Corresponding author)

Prof. Colin Bradley  
Department of General Practice  
University College Cork  
Cork  
Ireland

Shane Cullinan  
Pharmaceutical Care Research Group  
School of Pharmacy  
University College Cork  
Cork  
Ireland

Prof. Stephen Byrne  
School of Pharmacy  
University College Cork  
Cork  
Ireland  
(Alternate corresponding author. Email: [Stephen.byrne@ucc.ie](mailto:Stephen.byrne@ucc.ie), Tel: +35321 4901658)

**Objectives:**

To explore health care professionals views of antibiotic prescribing in Long Term Care Facilities (LTCF). To use the findings to recommend intervention strategies for antimicrobial stewardship in LTCF.

**Design:**

Qualitative semi-structured interviews were conducted. The data were analysed by thematic content analysis. After the interviews, the emerging findings were mapped to the Theoretical Domains Framework (TDF), and the Behaviour Change Wheel and Behaviour Change Technique (BCT) Taxonomy were used to recommend future intervention strategies.

**Participants:**

Interviews were conducted with 37 health care professionals who work in LTCF (10 general practitioners, 4 consultants, 14 nurses, 9 pharmacists) between December 2012 and March 2013.

**Setting:**

Interviews were conducted in the greater Cork region.

**Results:**

The main domains from the TDF which emerged were; 'Knowledge', 'Environmental context and resources', 'Social influences', 'Beliefs about consequences', 'Memory, attention and decision making' with the findings identifying a need for 'Behavioural regulation'. Many participants believed that antibiotic prescribing was satisfactory at their LTCF, despite the lack of surveillance activities.

**Conclusion:**

This study, using the TDF and BCT Taxonomy, has found that antibiotic prescribing in LTCF is influenced by many social and contextual factors. The challenges of the setting and patient population, the belief about consequences to the patient, the lack of implementation of guidelines and knowledge regarding antibiotic prescribing patterns are significant challenges to address. Based on the study findings and the application of the TDF and BCT Taxonomy some practical intervention functions for antimicrobial stewardship in LTCF are suggested.

## **Article Summary**

### **Strengths and Limitations of the study:**

- This study is the first to undertake qualitative interviews investigating antibiotic prescribing in LTCF and to map the findings to the TDF, COM-B model and BCT Taxonomy in order to recommend intervention strategies.
- The study captures the views of the key health care professionals involved in antibiotic prescribing in LTCF; general practitioners, consultants, nurses and pharmacists.
- The findings indicate that antibiotic prescribing in LTCF is strongly influenced by the context of health care delivery in LTCF. There is a need for 'Behavioural regulation' strategies such as antibiotic surveillance in LTCF, and intervention functions such as setting goals, education, audit, feedback and monitoring may contribute to improved Antimicrobial stewardship in LTCF.
- All the participants in the study were based in the same region in Ireland and may hold different views to those in other countries or regions. However, the broad sample and depth of discussion offers valuable insights into the Irish LTCF context.

### **Funding:**

This research was funded by the Health Research Board PHD/2007/16.

**Competing Interests:** None

## **Introduction:**

Antibiotic use in Long Term Care Facilities (LTCF) contributes to the emergence of multi-drug resistant pathogens and healthcare-acquired infections<sup>(1)</sup>. The Royal College of Physicians in Ireland Policy Group on Health Care Associated Infection in Nursing Homes recommends that implementation of best practice for antibiotic stewardship in LTCF and on-going research to guide interventions is necessary<sup>(2)</sup>. In the Irish context, the Healthcare Associated infections in Long Term Care (HALT) point prevalence studies have reported a higher prevalence (10%) of antibiotic prescribing compared to the European average (5%) in 2010 and 2013<sup>(3)</sup>. Internationally, studies have suggested that between 25-75% of antibiotic prescriptions in LTCF are inappropriate and that antimicrobial resistance (AMR) is rising<sup>(1, 4)</sup>. Quantitative studies investigating antibiotic prescribing in LTCF have suggested that prescribing patterns are driven by prescriber factors rather than infection prevalence or antimicrobial stewardship initiatives<sup>(5)</sup>. It is necessary to investigate the factors that influence antibiotic prescribing behaviours in LTCF. In order to capture this information, the views of the health care professionals that are central to this process must be explored. Recent systematic reviews of qualitative studies of antibiotic prescribing behaviour have focussed mainly on the overall primary care or secondary care setting without focusing on the LTCF setting specifically<sup>(6-7)</sup>. It is necessary to evaluate LTCF as a separate setting for antibiotic prescribing because patient care is often influenced by factors unique to this setting, such as the co-morbidities of the patient population and organisational culture<sup>(8)</sup>.

The use of theory to understand the mechanisms of action of intervention strategies to change behaviour has been shown to improve the effectiveness of interventions<sup>(9)</sup>. In recent years the Theoretical Domains Framework (TDF) has gained much attention as a potentially overarching theoretical framework to identify the areas where behavioural change interventions can focus<sup>(10)</sup>. The TDF was initially developed in response to requests from implementation researchers who recognised the need for an integrative framework to address the behaviour change factors relevant to intervention studies<sup>(11)</sup>. The TDF has been used in many different types of studies and the framework has been refined and validated<sup>(12)</sup>. It consists of fourteen domains which consist of eighty-four component constructs<sup>(12)</sup>. The framework comprehensively draws together, from thirty-three theories of behaviour, the crucial influences on behaviour<sup>(10)</sup>. The TDF has been used in qualitative studies to guide the development of interview topic guides and it has also been used as a coding framework in the analysis of qualitative material<sup>(10, 13)</sup>. Researchers in this area have designed a Behaviour Change Wheel which consists of Capability, Opportunity, Motivation and Behaviour components or the COM-B model as it is also known (Figure 1)<sup>(11, 14)</sup>. The corresponding Behaviour Change Technique Taxonomy (BCT Taxonomy) has been developed in order to standardise the content and reporting of intervention studies<sup>(11, 14-15)</sup>. In previous qualitative studies of antibiotic prescribing in LTCF a behavioural theory has not been used to inform the evaluation or to identify areas for antimicrobial stewardship<sup>(16-17)</sup>. In order to fully capture and understand the factors influencing antibiotic prescribing the views of all health care professionals involved in this process is required. The advantage of conducting qualitative investigations before the implementation of an intervention is that the findings can inform the content and delivery of the intervention based on health care professional views and experiences<sup>(18)</sup>.

With increasing rates of AMR and higher than average rates of antibiotic prescribing in Irish LTCF an in-depth qualitative investigation of the views of all key health care professionals involved in this

process is required. The objective of this study is to conduct a theoretically informed qualitative study of the factors influencing antibiotic prescribing in LTCF. The findings of the study will be analysed using the TDF and BCT Taxonomy to identify key areas to target in antimicrobial stewardship interventions.

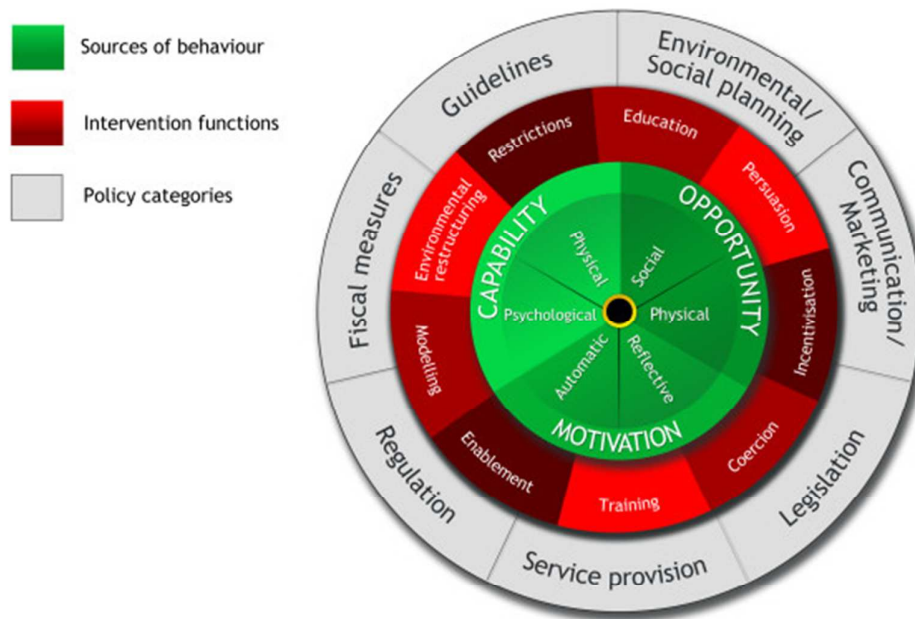

Figure 1. The Behaviour Change Wheel. Source: Michie, Atkins and West<sup>(11)</sup>.

## Methods:

### Study design:

Semi-structured interviews were conducted with Nurses, Doctors (Consultants, General Practitioners (GP)) and Pharmacists to investigate their opinions and experiences of antibiotic prescribing in LTCF in the greater Cork area. The interview method was the most feasible given that participants were interviewed at their place of work (LTCF, GP surgeries, Consultants offices, Community pharmacies). The interview method also supports an honest and in-depth account of an individual's experience and opinions<sup>(19)</sup>.

### Sample:

The method of sampling was convenience sampling with maximum variation in order to recruit a variety of participants. The sampling strategy aimed to recruit participants of varying years of experience, from different LTCF settings of varying bed occupancy and from varying funding

categories (private, public and voluntary organisations). Participants were recruited by telephone invitation and were located within a 40 kilometre radius of Cork city. Interviews were conducted until data saturation was reached and two extra interviews per health care professional group were conducted to ensure that no new themes were emerging<sup>(20-21)</sup>.

### Topic Guide & Interviewing:

A topic guide was developed based on a review of previous literature and discussion among the authors and is summarised in Table 1. The topic guide was made relevant to the appropriate health care professional group in terms of the question perspective but the key issues were the same across the board. The domains of the TDF were considered when designing the topic guide but the structure was not restricted by the TDF at this stage to allow for the emergence of unanticipated and unprompted issues during the interviews<sup>(19)</sup>. The topic guide was refined after being piloted by interviewing one Pharmacist and two GPs. Only one of the pilot GP transcripts is included in the final analysis. Ethical approval was obtained from the Clinical Research Committee of the Cork Teaching Hospitals.

**Table 1. Summary of the Interview topic guide.**

| Area                                          | Issues discussed                                                                                                                                                                                                                                |
|-----------------------------------------------|-------------------------------------------------------------------------------------------------------------------------------------------------------------------------------------------------------------------------------------------------|
| Demographic information                       | Years in practice, years working in LTCF.                                                                                                                                                                                                       |
| Process & decision making:                    | Procedure for diagnosing treating infection<br>Challenges in treating infection<br>Involvement with other health care professionals                                                                                                             |
| Knowledge:                                    | Use of or awareness of a guideline for antibiotic prescribing<br>Antibiotics commonly prescribed<br>Knowledge of local antimicrobial resistance patterns<br>Consequences of not prescribing antibiotics<br>Problems associated with antibiotics |
| Strategies to improve antibiotic prescribing: | Current activities, audits or prescribing feedback<br>Areas where more support is needed                                                                                                                                                        |

The one to one interviews were conducted by AF at the participant's place of work (LTCF, GP surgeries, Consultants offices, Community pharmacies), in a quiet room to maintain privacy and confidentiality, at a date and time convenient for them. The purpose of the study was outlined to participants. The interviewer (AF) presented herself as a researcher and did not engage in discussion with the participants about the study or topic guide before the interview so as not to bias their feedback. Some demographic information was collected. The interviews were recorded, with participant approval and written informed consent, and the participants were encouraged to think of specific case examples to elaborate on the topics. The interviewer prompted and explored issues in more detail as appropriate<sup>(19)</sup>. The interview allowed for the emergence of unprompted information and themes. All interviews were anonymised and transcribed by AF and preliminary familiarisation was begun during the transcription process. In this way, data analysis began at an early stage and the topic guide was constantly reviewed and new topics were introduced throughout the interview process as needed. The interviews ranged from 10 minutes to 35 minutes (mean

1  
2  
3 interview length 22 minutes). The interview transcript was available to the participants on request.  
4 Field notes were recorded after each interview.  
5  
6  
7

### 8 **Analysis:**

9  
10 As described above an iterative process of data collection and analysis was conducted. All transcripts  
11 were coded in QSR Internationals NVivo Qualitative Data Analysis Software version 10<sup>(22)</sup>. The initial  
12 phase of familiarisation involved several readings of the interview transcripts. The transcripts were  
13 initially coded by AF and a coding scheme was developed. Based on the initial familiarisation it was  
14 decided not to analyse the interviews in three separate health care professional groups. This  
15 decision was taken as the topic guide was similar between the groups and similar issues, from  
16 different groups, were emerging throughout all interviews. To ensure consistencies in coding three  
17 coders (AF, SC & SB) independently coded four interview transcripts. The inter-rater reliability was  
18 high and any disagreements were resolved by discussion. Participants own language was often used  
19 in the naming of codes in order to maintain a faithful representation of their opinions and  
20 experiences. The codes or specific beliefs were then attributed to the domains of the TDF. The next  
21 stage involved identifying what behaviours needed to change and in what methods could be  
22 recommended to achieve this. This was conducted by mapping the TDF domains to the Behaviour  
23 Change Wheel, specifically the Capability, Opportunity and Motivation components<sup>(11)</sup>. The  
24 appropriate BCT Taxonomy (version 1) was applied to suggest intervention functions for  
25 antimicrobial stewardship in LTCF. A completed checklist of the Consolidated criteria for Reporting  
26 qualitative research (COREQ) is presented in the Supplementary material Table A<sup>(23)</sup>.  
27  
28  
29  
30  
31  
32  
33  
34  
35  
36  
37  
38

### 39 **Results:**

40 Thirty-seven interviews were conducted in total (14 Doctors (10 GPs, 4 Consultants), 14 Nurses and 9  
41 Pharmacists) from a range of LTCF settings. Participant detail is provided in Table 2. The key themes  
42 are presented by means of the relevant domain from the TDF. Participant quotes are represented in  
43 italics by profession (General Practitioner = GP, Consultant = C, Nurse= N and Pharmacist = P) and  
44 the corresponding number refers to their details in Table 2.  
45  
46  
47  
48  
49  
50  
51  
52  
53  
54  
55  
56  
57  
58  
59  
60



| Doctor (General Practitioners)                    | Gender | Years medical experience     | LTCF setting & bed occupancy                                      | Years of experience in LTCF |
|---------------------------------------------------|--------|------------------------------|-------------------------------------------------------------------|-----------------------------|
| 1.                                                | F      | 15                           | Private (12 patients in a LTCF)                                   | 15                          |
| 2.                                                | F      | 15                           | Public/private, (63 bed LTCF)                                     | 8                           |
| 3.                                                | F      | 2                            | 1 Public, 1 Private                                               | 2                           |
| 4.                                                | M      | 9                            | Private (14 patients in a LTCF)                                   | 9                           |
| 5.                                                | F      | 10                           | Private (15 patients in a LTCF)<br>Public (20 patients in a LTCF) | 8                           |
| 6.                                                | M      | 1                            | Private (10 patients in a LTCF)                                   | 1.5                         |
| 7.                                                | M      | 20+                          | Private (>100 in total)                                           | >20                         |
| 8.                                                | M      | 19                           | Voluntary (>100 in total)                                         | 19                          |
| 9.                                                | M      | 30+                          | Mixed setting (patient number varies)                             | >30                         |
| 10.                                               | M      | 5                            | Mixed setting (patient number varies)                             | 5                           |
| Doctor (Consultant)                               | Gender | Speciality                   | LTCF setting                                                      | Years of experience in LTCF |
| 1.                                                | M      | Geriatrician                 | Public, voluntary                                                 | >5                          |
| 2.                                                | M      | Geriatrician                 | Public                                                            | >5                          |
| 3.                                                | F      | Geriatrician                 | Public                                                            | >5                          |
| 4.                                                | M      | Microbiologist               | Public, private, voluntary                                        | >5                          |
| Pharmacist                                        | Gender | Years of pharmacy experience | LTCF details (range bed occupancy)                                | Years of experience in LTCF |
| 1.                                                | M      | 15                           | Public, (48)                                                      | 5                           |
| 2.                                                | F      | 8                            | Public & Private (13-250)                                         | 8                           |
| 3.                                                | F      | 30                           | Private, (40-120)                                                 | 7                           |
| 4.                                                | F      | 5                            | Private, (40-120)                                                 | <1                          |
| 5.                                                | M      | 35                           | Private, (50-60)                                                  | 20                          |
| 6.                                                | F      | 1                            | Private, (25)                                                     | 1                           |
| 7.                                                | M      | 14                           | Private, (25)                                                     | 14                          |
| 8.                                                | F      | 18                           | Public (>150)                                                     | 2                           |
| 9.                                                | M      | 15                           | Public (38)                                                       | 5                           |
| Nurse                                             | Gender | Years of nursing experience  | LTCF category                                                     | Years of experience in LTCF |
| 1. Staff nurse                                    | F      | 21                           | Private (50)                                                      | 4                           |
| 2. Staff nurse                                    | F      | 10                           | Private (50)                                                      | 4                           |
| 3. CNM                                            | F      | 25                           | Public (40)                                                       | 11                          |
| 4. Staff Nurse                                    | F      | 16                           | Public (40)                                                       | 5                           |
| 5. CNM                                            | F      | 15                           | Public (38)                                                       | 12                          |
| 6. Advanced Nurse Practitioner & Nurse Prescriber | F      | 26                           | Public (>100)                                                     | 19                          |
| 7. CNM                                            | F      | 41                           | Voluntary (>100)                                                  | 6                           |
| 8. Staff Nurse                                    | F      | 30                           | Voluntary (30)                                                    | 30                          |
| 9. Staff Nurse                                    | F      | 11                           | Public (38)                                                       | 11                          |
| 10. CNM & Nurse prescriber                        | F      | 33                           | Public (38)                                                       | 26                          |
| 11. CNM                                           | F      | 32                           | Public/Private (60)                                               | 20                          |
| 12. Staff Nurse                                   | F      | 11                           | Public/private (60)                                               | 3                           |
| 13. IPCN <sup>#</sup>                             | F      | 15                           | Public (multi-site)                                               | 10                          |
| 14. IPCN                                          | F      | 15                           | Public (multi-site)                                               | 10                          |

**Table A. List of participants interviewed, years of experience and LTCF setting.**

F = Female, M = Male. \*CNM = Clinical Nurse Manager.

<sup>#</sup>IPCN= Infection Prevention and Control Nurse.

### **Theoretical Domains Framework:**

The analysis identified key domains of the TDF that were found to be relevant and they are described below. The other domains that were not identified (Optimism, Reinforcement, Intentions, Goals and Emotions) are not discussed as not enough references to the relevant constructs were made.

#### **Knowledge:**

It was decided to merge the domains 'Knowledge' and 'Skill' as the constructs emerging were overlapping and most findings related to the knowledge factors. The participants did not report that challenges in diagnosing and treating patients in LTCF was due to a lack of skills or need for further training in undertaking physical tasks. Knowledge of antibiotic guidelines was variable among all participants. Many participants, from all professions, were not aware of the Guidelines for Antimicrobial Prescribing in Primary Care 2011 or of the Health Protection Surveillance Centre (HPSC) guidelines for the management of catheter and non-catheter related urinary tract infections<sup>(24-25)</sup>. In most cases participants report a passive, rather than active, disregard of guidelines. Nurses in the public setting were more aware of HPSC guidelines but reported that they are not often adhered to.

*"so we have all the antibiotic guidelines, we have the primary care guidelines for antibiotic prescribing which don't give you exact antibiotics to prescribe. Like generally we use the CUH [Cork University Hospital], MUH [Mercy University Hospital] ones do you know those antimicrobial guidelines." (GP2)*

The interpretation of urine samples from catheterised patients poses a challenge in LTCF. Asymptomatic bacteriuria is an area where Doctors and Nurses felt unsure about whether to prescribe antibiotics or not. Several Consultants identified that this is often an area of antibiotic overuse.

*"That is a big bug bear of mine, the UTI, the old person with a UTI, it drives me crazy. Every old person has a UTI and I'd say at least once a day I say to somebody 'you know if you take a room full of frail old people half of them will have dirty urine, it doesn't mean they have a UTI'." (C2) (UTI = Urinary Tract Infection).*

Many participants conveyed confidence in their clinical knowledge due to their years of experience in LTCF practice and their in-depth knowledge of the individual patients.

*"So it can be very difficult to know, you are going by a bit of guesswork, a bit of analysis of results, a bit of examination, a bit of the history from the nurse, it depends on how well the nurse knows them as well, how changed they are from their usual baseline. Then you make a decision. You probably have a lower threshold for using antibiotics in long term care facilities because of all of those factors." (GP9)*

In terms of clinical knowledge of the different antibiotics and their indications it was evident that this varies between participants. Detailed knowledge of antibiotic microbiological coverage or recommended infection indication was not displayed or reported in the findings. Participants were

1  
2  
3 more likely to refer to 'strong antibiotics' and only rare references to 'first line antibiotics' were  
4 made. All participants are aware that AMR is a growing public health problem and that overuse of  
5 antibiotics is a contributory factor but few had any insight into local AMR data or referred to AMR as  
6 a serious problem in their LTCF.  
7

8  
9 *"... we only have a problem with resistance when it comes to urine infections because that is where I  
10 think we are over-treating."* (GP4).  
11

12 Closely aligned to 'Knowledge' findings are the themes from the '**Belief of capabilities**' domain.  
13 Nurses expressed confidence in providing a high quality of care for the patients and that the more  
14 qualified Nurses, Nurse Prescribers and Clinical Nurse Managers provide a valuable to support to all  
15 nurses.  
16

17  
18 *"...she is very good (nurse manager) and very with it and she links up with the doctors quite a bit. If  
19 she has an issue they really listen to her as well."* (N4)  
20

21 Doctors also expressed professional confidence in caring for LTCF patients with infection. Guidelines  
22 are seen as a useful reference but deviations from the guidelines were justified by relying on their  
23 own, or on Nurses, clinical judgement and expertise.  
24

25  
26 *"nothing in medicine is black and white so you can't have guidelines, guidelines are just that, they are  
27 guidelines not protocols. I mean that is the difference people need to understand, protocols are  
28 something you have to stick to"* (GP4)  
29

30  
31 *"I have no issue with guidelines you know. I think the most important thing is that when veering  
32 away from guidelines is justifying what we are doing."* (GP7)  
33

34  
35 *"You don't want them (nurses) to see somebody in the bed who they are worried about and say oh  
36 she's not ticking such a box so I'm not going to ask the doctor to see her"* (GP1)  
37

38 The Pharmacists interviewed expressed confidence in the medicines management service they  
39 provide to the LTCF but are less empowered in terms of expanding their clinical role. The reasons for  
40 this are the lack of time and the need for further training and guidelines in this area.  
41

42  
43 *"I think if they had more structured antibiotic CPD for antibiotics in nursing homes and even for  
44 pharmacies if we had more specific stuff it would be a big help."* (P4). (CPD= Continuing Professional  
45 Development).  
46

47  
48 *"I would be fairly confident but sure I have all the resources here so I can have a quick look and go  
49 through them, I wouldn't know all of it off the top of my head, some of it I would."* (P9).  
50

51  
52 *"I would like to be involved in some sort of you know developing some sort of protocol or guidelines  
53 within the nursing home, provided we are given the resources and the time to do that with a  
54 multidisciplinary team..."* (P2).  
55

### 56 **Social/professional role and identity:**

57 The responsibility for antibiotic prescribing was clearly assigned to the Doctor but interestingly the  
58 key role of the Nurse in that process was also conveyed by all professions.  
59

1  
2  
3  
4  
5 *"I would be the one dealing with the GPs all the time on their rounds...so even though I think so and*  
6 *so might need an antibiotic or whatever, it is the doctors call in the end."* (N3)  
7  
8  
9

10 *"the way we operate is it is a nursing led facility and we come in to support that nursing lead. We are*  
11 *very lucky with the level of clinical nurse specialists that are there. So they have that higher training*  
12 *in dealing with elderly people, so they provide the care effectively and they rope us in then if there*  
13 *are issues that they are unhappy with or if there are issues as regards to prescribing. So we get*  
14 *involved if they have a concern about a patient or regarding a possibility or probability of infection."*  
15 (GP7)  
16  
17

18  
19 It was reported that between Doctors, antibiotic prescribing practices vary in terms of the volume of  
20 and choice of antibiotics prescribed. It was reported several times that out-of-hours Doctors are  
21 often more likely to prescribe antibiotics. The main reason to explain this is that the patient is  
22 generally sicker if a Doctor has to visit out of hours and an antibiotic is prescribed to avoid  
23 hospitalisation or a revisit.  
24

25  
26 *"you know if they are calling SouthDoc the patient has a fever, clinical signs, a bad cough, you are*  
27 *probably more likely to prescribe than not."* (GP9)  
28 (SouthDoc is the out-of-hours doctors service in the greater Cork region.)  
29

30  
31 The difficulties, as reported by an out-of-hours Doctor, are that they do not know the patient's  
32 medical history, they have limited diagnostic equipment, the patient is often very ill and they may be  
33 under pressure from the patient's family or Nurse to prescribe. Some GPs reported that out-of-hours  
34 Doctors may not prescribe first line antibiotics.  
35

36 *"...you are called as an out of hours doctor you often times have little option but to prescribe an*  
37 *antibiotic because you don't know the patient, you don't know the staff, you often don't know the*  
38 *background and you may not have complete notes in the history"* (GP5)  
39

40  
41 The role of the Pharmacist in antimicrobial stewardship has not developed considerably in LTCF  
42 based on the reports of those interviewed. Some reported that they already attend clinical  
43 multidisciplinary meetings with the GPs and Nurses and would welcome the opportunity to engage  
44 in this further, with support and appropriate training to improve knowledge. Others referred to the  
45 lack of time to engage in antimicrobial stewardship and that the priorities for Pharmacists in LTCF  
46 were other medicines management issues.  
47  
48

49 *"In terms of antibiotics I don't know necessarily if there is a huge role there, there are roles in other*  
50 *medicines management issues but not particularly antibiotics."* (P9)  
51

### 52 53 **Social influences:** 54

55 The social context within which antibiotics are prescribed in LTCF is clearly evident in the findings.  
56 The influence of Nurses on Doctors decisions when managing patients with infection, especially  
57 when the decision to prescribe an antibiotic or not is made, was referred to frequently and by all  
58  
59

1  
2  
3 groups of professionals. The Nurses act in a gatekeeper role by communicating patient care issues  
4 and organising clinical assessments by the Doctor when they visit the LTCF. In some cases their  
5 influence in the decision making process of whether to prescribe an antibiotic can be felt as a  
6 pressure by doctors.  
7

8  
9 *"...they certainly guide us in our prescribing, they are probably, I don't know is this a fair or unfair  
10 thing to say but they are probably happier when we prescribe because at least they know something  
11 has been treated"* (GP2)  
12

13 *"You sometimes feel that you do come under pressure to prescribe, and you have to sort of avoid that  
14 you know."* (GP8)  
15

16  
17 *"Sometimes the doctors are guided by what we would suggest and what we feel or think. I suppose  
18 they just kind of, they are of the opinion we are with the patient so much more than they are but  
19 some doctors, definitely not all of them, some of them would defer to the nurse a little bit."* (N9)  
20

21 On the other hand, some Nurses also discussed their influence on Doctors in terms of delaying  
22 antibiotic prescriptions by suggesting 'watchful waiting' or that the Doctor would reassess the  
23 patient in a few days and reconsider the need for an antibiotic at that point.  
24

25  
26 The role of the Pharmacist is mainly in screening for drug interactions and providing medicines  
27 information, rather than influencing the antibiotic prescribing process. The influence of residents'  
28 family on Doctors and Nurses to assess their relative occurs but was not linked to a pressure to  
29 prescribe an antibiotic. Families tend to be satisfied once the Doctor has made a clinical assessment,  
30 even if they don't prescribe an antibiotic. The importance of including the families in the decision  
31 making process and establishing goals of care for patients was underlined by many Doctors, and  
32 interestingly by all the Consultant Geriatricians.  
33  
34

35 *"...the family would be insistent on them being seen by a doctor most of time and influence the nurse  
36 to call you but once you come and see them and assess them, no it would be uncommon that they  
37 would insist on an antibiotic."* (GP9)  
38

39  
40 *"My feeling about prophylactic antibiotics for UTIs and stuff is I ask the family and the patient ' do  
41 you feel it is helping or making a difference' and if it isn't I stop it. "* (C2)  
42

#### 43 **Environmental context & resources:**

44  
45 The key contextual issue raised is that the management of infection in LTCF is complicated by a high  
46 level of co-morbidity, cognitive impairment and dementia in these patients. The lack of diagnostic  
47 equipment and interpretation of microbiology results is a significant challenge for Doctors and  
48 Nurses. They also reported that these elderly patients do not always have a high temperature on  
49 infection and are often not able to communicate their symptoms. This links to 'Social Influences' as  
50 Doctors depend greatly on Nurses support to detect patients signs of infection. The restricted access  
51 to a Doctor was also a challenge to this process as many LTCF do not have an on-site Medical Officer  
52 but receive care from GPs who visit infrequently or only on request. Often, due to time constraints,  
53 this can lead to antibiotic prescribing 'over the phone' which one GP referred to as prescribing for  
54 "doctor reasons rather than patient reasons or bacteriological reasons" (GP6). These challenges are  
55 all explicitly linked to an increase in antibiotic prescribing by many participants.  
56  
57  
58  
59  
60

1  
2  
3 *"I think most of them end up getting an antibiotic to treat as a caution even though maybe it is not*  
4 *as indicated as it would be in the community" (GP2)*  
5

6 *"You sometimes feel that you are prescribing in those situations without a very definite bug or*  
7 *infection." (GP6)*  
8

9  
10 *"Occasionally if it is symptomatic UTI you may prescribe over the phone and see how they go. If it is*  
11 *not responding then you obviously need to go see them." (GP5)*  
12

13 Due to the plethora of clinical issues for discussion at the clinical multidisciplinary teams meetings  
14 antimicrobial stewardship was not reported as a key item on the agenda. There are numerous other  
15 competing demands on time during the Doctors visit to the LTCF and during the clinical meetings.  
16 Participants reported that the regulation of LTCF by the Health Information and Quality Authority  
17 (HIQA) ensures that medication management procedures and Pharmacist medication reviews are  
18 implemented. It was implied that antibiotic audits are only ever conducted to fulfil quality  
19 improvement requirements rather than to influence clinical practice. The organisational culture  
20 within LTCF, however, impedes many extra clinical and quality improvement activities because time,  
21 and perhaps motivation, is not available.  
22  
23

24  
25 *"at the moment there is a linked up thinking between the nursing home and the pharmacy... the*  
26 *triangle isn't complete yet where the GP is involved...there are some GPs who would be into going*  
27 *clinical meetings and having clinical meetings, others wouldn't be". (P7)*  
28

29  
30 *"since HIQA have leant on them a small bit it is far more detailed, there is a far more joined up*  
31 *thinking between pharmacy and the home and we have established a set of I suppose a complete*  
32 *medicine management system" (P7)*  
33

34 *"Then I suppose all it needs is someone like HIQA or the ICGP or the pharmacy crowd to come and*  
35 *say 'look lads you are not practicing properly unless you are doing this' then GPs do adhere to it, they*  
36 *will certainly adhere to it if they are told it is best practice and they all try to adhere to best practice."*  
37 *(GP2) (ICGP: Irish College of General Practitioners).*  
38  
39

40 The domains 'Environmental context and resources' and '**Beliefs about Consequences**' are closely  
41 aligned. The potential harm or hospitalisation of a vulnerable, co-morbid LTCF patient if an antibiotic  
42 is not prescribed is a concern to Doctors and Nurses. The general consensus was that over-  
43 treatment with antibiotics and subsequent care in the LTCF is preferred and that hospitalisation  
44 should be avoided if at all possible. The domain 'Emotion' is relevant here as participants spoke  
45 about fear of the patient coming to harm because of their decision.  
46  
47

48 *"...if that means you prescribe the odd antibiotic excessively, I think for the resident most times it's a*  
49 *better scenario for the individual than ending up in an A&E department because of an untreated*  
50 *infection. It's a balancing act really." (GP1)*  
51  
52

53 *"...you say look we will hold off on the antibiotic and I have certainly been caught once with a*  
54 *patient who then developed pyelonephritis and was sick and so that learns you alright." (GP7).*  
55

56 There is a lack of acknowledgement that antibiotic prescribing in LTCF contributes to the public  
57 health problem of AMR. May references to AMR associated it with antibiotic prophylaxis and that it  
58  
59

1  
2  
3 was not common among the patients in the LTCF. There was little discussion about how to avoid the  
4 development of AMR and a sense of inevitability regarding this unavoidable problem was evident.  
5

6 *"..writing a prescription for an antibiotic is seen as an action or a response, a quick action or a quick*  
7 *response to some problem... I would doubt that resistance is at the forefront of that decision at that*  
8 *time."* (C3)  
9

#### 10 **Memory, attention and decision processes:**

11 The variability and complexity of the decision making process is evident by the findings attributed to  
12 the aforementioned TDF domains. For many Doctors this decision making process is a culmination of  
13 the factors already outlined resulting in a '*balancing act*' as they make a risk-benefit assessment of  
14 the patients need for an antibiotic. The fear of the consequences for the patient and the uncertainty  
15 around the diagnosis of infection in LTCF patients was clearly linked to the overprescribing of  
16 antibiotics in LTCF by many participants. Much discussion centred on the decision of whether to  
17 prescribe an antibiotic or not, with much less thought given to the decision around which antibiotic  
18 to prescribe.  
19

20 *"I think if you wait and if the person gets sicker you are kind of damned and if you give them an*  
21 *antibiotic and they really did not have an infection and something else happens to them you are*  
22 *damned."* (C1)  
23

24 *"you probably do end up prescribing more for the elderly than you would for you or me who are*  
25 *younger, in the fact that you are always slightly worried that if you don't prescribe then they will get*  
26 *worse."* (GP8)  
27

28 The decision making autonomy and individual patient care approach dominates the decision making  
29 process for Doctors and Nurses. Their attention is focussed on the patient's clinical presentation,  
30 medical history and in some cases the overall care plan. As outlined in '*Beliefs about consequences*',  
31 the public health threat of AMR does not influence this decision.  
32

33 *"I would look to see do they have a temperature, not all the elderly will develop a temperature, some*  
34 *of them are immuno-compromised for various reasons so they don't always necessarily have a*  
35 *temperature. So looking at sats, looking at clinical findings, looking at have they gone off food, are*  
36 *they obviously unwell in themselves. I think that is one thing that sometimes guidelines don't*  
37 *capture. They don't capture that sort of, they will have criteria set down but they don't cover that*  
38 *sort of knowing the patient bit."* (GP1)  
39

40 Several participants acknowledged the valuable support of guidelines to help clinical decision  
41 making. Nurses and Pharmacists reported that guidelines are an effective way to ensure that all  
42 health care professionals were practicing evidence based medicine and that they are a necessity  
43 when dealing with outbreaks of infection.  
44

45 *"I think there needs to be clear guidelines and protocols in each setting regarding antibiotic use. I do*  
46 *tend to think that there is just generic broad spectrum prescribing of different types of infections*  
47 *without actually doing any sensitivity testing."* (P2)  
48

49 This leads to the important domain of '**Behavioural regulation**'. The extent of self-monitoring by  
50 means of antibiotic surveillance or audit is low and any reported activities generally consisted of  
51

1  
2  
3 participation in the HALT point prevalence studies in some, but not all, of the LTCF. Participants from  
4 all groups welcomed the idea of surveillance and reviewing antibiotic prescribing practices and felt  
5 that this would contribute to improving patient care. Doctors were somewhat cautious and several  
6 expressed doubt about conducting audits which judge an antibiotic prescription as being appropriate  
7 or not. Benchmarking audit results with other centres was not viewed as being a particularly useful  
8 exercise by many Doctors.  
9

10  
11 *“Comparing to other centres, yes but so what? What you are going to do is compare your errors*  
12 *really to their errors. What you need to do is to compare to what you should be doing and see if that*  
13 *can be implemented, if you can do that.” (GP6)*  
14

15  
16 A few participants made suggestions for information technology solutions such as decision support  
17 systems to guide decision making but that a lack of resources would rule out that option.  
18

19 *“So I suppose the first thing is the guidance is there, the second thing then is education around the*  
20 *guidance and then you have got to audit it. So it is a cycle, you know the cycle, but whether the*  
21 *government is willing to actually you know follow through with that, that is the big problem, with*  
22 *that is that some investment needs to be made in the education and then people can use it as an*  
23 *audit for their continuing medical education and their medical counsel requirements.” (GP1)*  
24  
25  
26

### 27 **Application of BCT Taxonomy and identification of potential Intervention functions:**

28  
29 The BCT Taxonomy (version 1) has been developed in order to improve the design and  
30 implementation of interventions<sup>(14)</sup>. In the COM-B model Capability, Motivation and Opportunity  
31 interact to generate Behaviour<sup>(11)</sup>. Capability represents an individual’s physical and psychological  
32 ability to undertake an activity. Opportunity represents all the factors outside the individual, social  
33 and physical, that prompt behaviour or make it possible. Motivation involves the brain processes,  
34 automatic and reflective, that direct behaviour. The principles of the COM-B model have been  
35 applied to the findings of this study to recommend strategies for antimicrobial stewardship in LTCF  
36 as outlined in Table 3. The detailed taxonomy has been applied in order to guide the standardisation  
37 of intervention content design and reporting<sup>(11)</sup>. The key strategies are; Setting Goals, Education,  
38 Audit, Feedback and Monitoring. These strategies have been selected based on the APEASE criteria  
39 (Affordable, Practical, Effective/cost-effective, Acceptable, Safe and Equitable)<sup>(11)</sup>. Many of the  
40 intervention functions were suggested by or discussed with the study participants, thereby  
41 improving the likelihood of acceptability in the future. If monitoring and feedback of antibiotic  
42 prescribing was introduced, it is possible that comparing or bench-marking the results to other LTCF  
43 would motivate health care professionals to reflect on and change their prescribing patterns. The  
44 TDF domains Goals and Intentions, which were not represented in the study findings, have been  
45 included because clear targets for antimicrobial stewardship are required to motivate behaviour  
46 change. Financial Incentivisation is suggested but is not likely to be a realistic option as a change to  
47 Irish health care policy would be required.  
48  
49  
50  
51  
52  
53  
54  
55  
56  
57  
58  
59  
60



Table 3. Suggested Intervention strategies identified by applying the TDF and BCT Taxonomy (version 1) to the study findings<sup>(11)</sup>.

| TDF domain*                            | COM-B Component**                    | BCT Taxonomy                                                           | BCT Label                                                                                                                                                               | Strategy examples (with Intervention function underlined)                                                                                                                                                                                                                               |
|----------------------------------------|--------------------------------------|------------------------------------------------------------------------|-------------------------------------------------------------------------------------------------------------------------------------------------------------------------|-----------------------------------------------------------------------------------------------------------------------------------------------------------------------------------------------------------------------------------------------------------------------------------------|
| BR, G, I, S/P Id.                      | C-(Psych.)<br>M-(Refl.)              | <b>Goals &amp; Planning</b>                                            | Goal Setting (Outcome).<br>Action Planning.<br>Review outcome goals.                                                                                                    | <b>Enablement:</b> Set targets for antibiotic usage.<br>Use Antibiotic 'Care Bundles'***                                                                                                                                                                                                |
| K, MAD, BR, B Cap, O.                  | C-(Psych.)<br>C-(Phys.)<br>M-(Refl.) | <b>Shaping knowledge, Natural consequences, Comparison of outcomes</b> | Instruction on how to perform behaviour.<br>Information about health consequences.<br>Credible source.                                                                  | <b>Education:</b> information about antibiotics, guidelines & AMR.<br><b>Persuasion:</b> Present information to emphasise importance of not prescribing antibiotics inappropriately. Persuasive communication of information, supported by Consultant Microbiologists & Geriatricians.  |
| En, MAD.                               | O-(Phys.)<br>C-(Psych.)<br>C-(Phys.) | <b>Antecedents, Associations</b>                                       | Restructuring the physical environment.<br>Prompts/cues.<br>Adding objects to the environment.                                                                          | <b>Environmental restructure/enablement:</b><br>Reduce/remove LTCF stock of non-first line antibiotics (Restriction).<br>Provide copies of the guidelines & supporting evidence.<br>Use antibiotic 'Care Bundles'.                                                                      |
| K, MAD, BR,                            | C-(Phys.)<br>C-(Psych.)<br>M-(Auto.) | <b>Repetition &amp; substitution</b>                                   | Behavioural practice/rehearsal                                                                                                                                          | <b>Training:</b> Practice referring to the Guidelines in daily practice                                                                                                                                                                                                                 |
| SI                                     | O-(Soc.)                             | <b>Social support</b>                                                  | Social support (practical).                                                                                                                                             | <b>Persuasion &amp; Enablement:</b> Encourage Doctors, Nurses & Pharmacists to promote guideline & 'Care Bundle' implementation                                                                                                                                                         |
| G, B Con, B Cap, BR, MAD S/P Id, O, SI | M-(Refl.)<br>C-(Psych.)<br>O-(Soc.)  | <b>Feedback &amp; Monitoring, Comparison of outcomes, Identity.</b>    | Feedback on outcome of behaviour<br>Discrepancy between current behaviour & goal.<br>Incompatible beliefs.<br>Information about others' approval.<br>Social comparison. | <b>Persuasion:</b> Audit & feedback of antibiotic prescribing & 'Care Bundles'.<br><b>Enablement:</b> Outline deviations from guidelines/evidence based practice.<br><b>Persuasion:</b> Bench-mark antibiotic usage against other LTCF.<br>Consultant review of antibiotic prescribing. |
| R, K, B Cap, S/P Id, O.                | C-(Psych.)<br>M-(Refl.)              | <b>Reward &amp; threat, Scheduled consequences.</b>                    | Knowledge.<br>Incentive (outcome).<br>Reward approximation/completion.                                                                                                  | <b>Incentivisation:</b><br>Positive reinforcement from Consultants of audit results.<br>Financial incentive will be provided if antibiotic prescribing targets met/'care bundles' implemented.                                                                                          |

\***TDF domains:** BR = Behavioural Regulation, G = Goals, I = Intentions, S/P Id = Social & Professional identity, K = Knowledge, MAD = Memory, Attention & Decision making processes, B Cap = Beliefs about Capabilities, O = Optimism, En = Environmental context & resources, B Con = Beliefs about consequences, SI = Social Influences, R = Reinforcement.

\*\***COM-B components:** C-(Psych) = Psychological Capability, C-(Phys) = Physical Capability, O-(Soc) = Social opportunity, O-(Phys) = Physical Opportunity, M-(Refl) = Reflective Motivation, M-(Auto) = Automatic Motivation.

\*\*\***Care bundle:** A care bundle is a collection of processes needed to effectively and safely care for patients undergoing particular treatments with inherent risks. Several interventions are 'bundled together' and, when combined, significantly improve patient outcomes<sup>(26)</sup>.

### **Discussion:**

This is one of the first studies to investigate the views of health care professionals in LTCF about antibiotic prescribing and to use a behavioural change theory to analyse the findings and suggest intervention strategies for antimicrobial stewardship. The findings have provided valuable information to understand the LTCF antibiotic prescribing culture in great detail. The challenges relating to antimicrobial prescribing in LTCF were identified along with many broad issues at play such as the organisational culture of LTCF and health care delivery in LTCF. This study has found that the antibiotic prescribing process is complicated in LTCF and influenced by social, cultural and contextual issues. The TDF has proven to be a very useful tool for the analysis of the interview findings in order to encompass the factors influencing the prescribing of antibiotics. Previous qualitative studies of antibiotic prescribing in LTCF identified the challenges of diagnosing infection in LTCF, the social pressures from family and nurses, and the variation in practice between different health care professionals, without investigating the findings from a theoretical perspective<sup>(16-17)</sup>. This study contributes to the knowledge base by providing more evidence to support the importance of behavioural regulation as a strategy for antimicrobial stewardship. The application of the findings to the COM-B model and the BCT Taxonomy has provided suggestions for appropriate intervention functions on which to model future antimicrobial stewardship interventions. The results indicate that several intervention functions such as education around guidelines, audit and feedback to measure performance, and guidance and persuasion by experts in the field, would target the domains identified by the TDF. When the main findings are distilled, the 'behavioural diagnosis' of the relevant COM-B components finds that a key driver for change and antimicrobial stewardship in LTCF is Motivation. It is evident from the findings that antibiotic prescribing in LTCF is influenced by social and environmental challenges rather than by antimicrobial stewardship results and strategies. In order to raise antimicrobial stewardship as a priority item for patient care and quality improvement all Doctors, Nurses and Pharmacists involved in LTCF need to be motivated to reflect on current practice by undertaking antibiotic surveillance in the LTCF.

An important finding of this study is that sub-optimal or inappropriate antibiotic prescribing is not something the LTCF participants believed was happening in their LTCF. In similar studies with hospital doctors, sub-optimal antibiotic prescribing has been admitted openly and is almost accepted as an inevitable outcome of patient care<sup>(27)</sup>. In the hospital setting sub-optimal antibiotic prescribing was accounted for by Doctors' benevolence, unwillingness to challenge the hospital medical hierarchy and a coping mechanism for time pressures<sup>(27-28)</sup>. This study found that most LTCF health care professionals reported satisfactory practices but were not able to support these beliefs with facts as no surveillance activities were in place. This reinforces the need for on-going behavioural regulation measures in LTCF, as is conducted in most hospital settings. Antibiotic stewardship strategies are commonly classified as persuasive (education, audit and feedback) or restrictive (restricted formulary, prior authorisation) or structural (e.g. computer decision support systems)<sup>(29)</sup>. A systematic review of interventions to improve antibiotic prescribing in hospitals recommends that both groups of techniques improve patient outcomes and reduce AMR, but that restrictive techniques should only be used when urgent<sup>(29)</sup>. In ambulatory care, multi-faceted interventions involving educational techniques work best when local barriers to change are addressed<sup>(30)</sup>. A systematic review of trials to improve antibiotic prescribing in LTCF found that

1  
2  
3 educational sessions and material, involving local consensus with staff, are generally acceptable but  
4 the results of most studies were modest and not sustained <sup>(31)</sup>. This suggests a greater need to  
5 investigate the behavioural reasons to explain these trial results and the use of intervention  
6 functions which sustain motivation for change.  
7

8  
9 The challenge of designing and delivering antimicrobial stewardship interventions in LTCF may be  
10 compounded by the unique organisational culture present which is different to the hospital and  
11 primary setting. It has been well acknowledged that LTCF have a wide variety of organisational  
12 models and service delivery structures e.g. Nurse to resident ratio, access to Doctor, access to  
13 diagnostic equipment or microbiology results <sup>(32)</sup>. The influential role of nurses, the variability in  
14 practices between LTCF, the ethical considerations of caring for patients with dementia and at the  
15 end of their life, are all characteristic features of LTCF services that must be considered when  
16 planning quality improvement strategies <sup>(8)</sup>. The Schein model of organisational culture, as previously  
17 discussed by Hughes *et al.*, suggests that in order to truly understand an organisation a deeper  
18 knowledge of the underlying assumptions needs to be analysed, and not just the observable  
19 patterns of behaviour <sup>(33)</sup>. In order to overcome the potential 'normalisation of substandard  
20 prescribing practices', the discrepancy between participants' assumptions and reality needs to be  
21 addressed. This is important in relation to AMR as participants do not link the public health problem  
22 with their LTCF patients, and in relation to antibiotic prescribing which many assume to be  
23 satisfactory in their LTCF without any supporting evidence.  
24  
25  
26  
27

28 Broom *et al.* have examined antibiotic prescribing decisions in Australian hospital doctors by using  
29 Bourdieu's theory of practice to try to understand the disjunction between AMR and sub-optimal  
30 antibiotic prescribing practices by Doctors <sup>(27)</sup>. They found that Doctors feel a sense of benevolence  
31 to their individual patient which often leads to over-prescribing antibiotics, without consideration of  
32 the public consequences of AMR. This echoes findings in this study which highlights the perception  
33 that the public health problem of AMR and antibiotic prescribing in LTCF settings are not connected.  
34 It is possible to postulate that a lack of awareness of the true severity and scale of AMR in LTCF is  
35 underpinning this disjunction. If this is the case then up to date access to local AMR patterns in  
36 concise and regular bulletins for healthcare professionals will help to inform and motivate  
37 prescribing behaviours. This information, coupled with education on recommended guidelines, will  
38 address the 'Knowledge' and 'Beliefs about Consequences' identified in the interview findings.  
39 External barriers such as lack of time to use guidelines, difficulty in following the format of  
40 guidelines, the inertia of previous practice and lack of outcome expectancy must be addressed by  
41 these persuasive education initiatives <sup>(34)</sup>. The practicalities of interventions in the LTCF setting must  
42 be considered and local issues such as the time available for education and health care professional  
43 participation in antimicrobial stewardship must be addressed. Fundamental to the success of  
44 hospital antimicrobial stewardship interventions is the introduction of a multidisciplinary team  
45 including Consultants, Pharmacists and specialist Nurses (35). This approach should be adopted in  
46 the LTCF setting, especially given the already influential role of the Nurse and the potential for  
47 expanding Pharmacists clinical roles in this area. Pharmacists already have an existing requirement  
48 to visit LTCF and review patient's medication at least on a three-monthly basis <sup>(36)</sup> <sup>(37)</sup>. The recently  
49 proposed draft update to the HIQA Standards for Residential Care Settings for Older People in  
50 Ireland includes Theme 3 'Safe Service' whereby Standard 3.4.7 recommends that antimicrobial  
51 medication is given special consideration <sup>(38)</sup>. There is potential here for Pharmacists to increase their  
52 antimicrobial stewardship activities under the umbrella of this new guidance.  
53  
54  
55  
56  
57  
58  
59  
60

1  
2  
3 A limitation of the study is social desirability which is particularly common in prescribing research  
4 when the participant gives the answer they feel the interviewer wants to hear. As the interviews  
5 progressed, however, it became evident that once the participants felt at ease and that their  
6 practices were not being judged, they spoke freely and honestly about the challenges of antibiotic  
7 prescribing in LTCF. Their reports that antibiotics are often prescribed unnecessarily is a testament  
8 to that. The fact that the interviewer (AF) is a Pharmacist may have affected the participant dialogue  
9 if they felt that their views or knowledge of antibiotics was being tested. But this did not emerge as a  
10 significant issue as the interview data and the opinions expressed were overall very honest and  
11 open. A key strength of the study was the interview method which allowed participants to discuss  
12 openly their beliefs and views of the antibiotic prescribing process and the performance of others  
13 involved in this process. While all participants were from LTCF in the greater Cork region, the  
14 potential limitation of this was overcome by the broad sampling strategy. The broad sample of  
15 professionals with a variety of experience, from a range of LTCF funding categories and sizes  
16 increases the likelihood that these findings are a strong representation of the true factors  
17 influencing antibiotic prescribing in Irish LTCF.  
18  
19  
20  
21  
22  
23

### 24 **Conclusion:**

25  
26 This study provides a detailed insight into behavioural factors influencing the antibiotic prescribing  
27 process in LTCF. The incorporation of behavioural theory, such as the TDF and BCT taxonomy, has  
28 supported the identification of key factors such as environmental context and knowledge, which are  
29 an integral to understanding antibiotic prescribing in LTCF. The key component which requires  
30 attention in future antimicrobial stewardship interventions is motivation which will result if  
31 participants have in-depth knowledge of antibiotic prescribing practices as captured by antibiotic  
32 surveillance. The lack of formal antimicrobial stewardship in LTCF has also been identified and is  
33 recommended as an area to address in future interventions studies. This must become a priority for  
34 researchers in this field in order to obtain successful results in antimicrobial stewardship initiatives.  
35 It is recommended that future intervention studies incorporate behavioural theory, and  
36 standardised BCT Taxonomy, to achieve detailed feedback from participants on the successes and  
37 challenges of antimicrobial stewardship.  
38  
39  
40  
41  
42  
43  
44  
45  
46  
47  
48  
49  
50  
51  
52  
53  
54  
55  
56  
57  
58  
59  
60

## **FOOTNOTES**

### **CONTRIBUTORSHIP STATEMENT**

AF conceived the study, conducted the interviews and the analysis and wrote the first draft of the manuscript. SB, CB and SC were involved in the analysis and interpretation of the data. All authors read and approved the final manuscript.

### **DATA SHARING STATEMENT**

No additional data are available.

### **COMPETING INTERESTS**

None

### **References:**

1. Nicolle LE. Antimicrobial resistance in long-term care facilities. *Future Microbiol.* 2012 Feb;7(2):171-4.
2. Royal College of Physicians in Ireland Policy Group on Healthcare-Associated Infection. Healthcare-associated Infections and Nursing Homes or extended care settings.: Royal College of Physicians in Ireland.
3. European Centre for Disease Prevention and Control. Point prevalence survey of healthcare-associated infections and antimicrobial use in European long-term care facilities. April–May 2013. Stockholm.2014.
4. Nicolle L, Bentley D, Garibaldi R, Neuhaus E, Smith P. Antimicrobial Use in Long Term Care Facilities. *Infect Control Hosp Epidemiol.* 2000;21(8):537-45.
5. Daneman N, Gruneir A, Bronskill SE. Prolonged antibiotic treatment in long-term care: Role of the prescriber. *JAMA Internal Medicine.* [doi: 10.1001/jamainternmed.2013.3029]. 2013:1-10.
6. Teixeira Rodrigues A, Roque F, Falcao A, Figueiras A, Herdeiro MT. Understanding physician antibiotic prescribing behaviour: a systematic review of qualitative studies. *Int J Antimicrob Agents.* 2013 Mar;41(3):203-12.
7. Tonkin-Crine S, Yardley L, Little P. Antibiotic prescribing for acute respiratory tract infections in primary care: a systematic review and meta-ethnography. *Journal of Antimicrobial Chemotherapy.* 2011 July 15, 2011.
8. Hughes C, Lapane K, Kerse N. Prescribing for older people in nursing homes: challenges for the future. *International journal of older people nursing.* 2011;6(1):63-70.
9. Colquhoun HL, Brehaut JC, Sales A, Ivers N, Grimshaw J, Michie S, et al. A systematic review of the use of theory in randomized controlled trials of audit and feedback. *Implementation science : IS.* 2013 Jun 10;8(1):66.
10. Francis JJ, O'Connor D, Curran J. Theories of behaviour change synthesised into a set of theoretical groupings: introducing a thematic series on the theoretical domains framework. *Implementation science : IS.* 2012 Apr 24;7(1):35.
11. Michie S, Atkins L, West R. *The Behaviour Change Wheel: a Guide to Designing Interventions.* Great Britain: Silverback Publishing; 2014.

12. Cane J, O'Connor D, Michie S. Validation of the theoretical domains framework for use in behaviour change and implementation research. *Implementation science : IS.* 2012;7:37.
13. Duncan EM, Francis JJ, Johnston M, Davey P, Maxwell S, McKay GA, et al. Learning curves, taking instructions, and patient safety: using a theoretical domains framework in an interview study to investigate prescribing errors among trainee doctors. *Implementation science : IS.* 2012 Sep 11;7(1):86.
14. Michie S, van Stralen MM, West R. The behaviour change wheel: a new method for characterising and designing behaviour change interventions. *Implementation science : IS.* 2011;6:42.
15. Michie S, Richardson M, Johnston M, Abraham C, Francis J, Hardeman W, et al. The behavior change technique taxonomy (v1) of 93 hierarchically clustered techniques: building an international consensus for the reporting of behavior change interventions. *Ann Behav Med.* 2013 Aug;46(1):81-95.
16. Schweizer AK, Hughes CM, Macauley DC, O'Neill C. Managing Urinary Tract Infections in Nursing Homes: A Qualitative Assessment. *Pharmacy World & Science.* 2005;27(3):159-65.
17. Walker S, McGeer A, Simor AE, Armstrong-Evans M, Loeb M. Why are antibiotics prescribed for asymptomatic bacteriuria in institutionalized elderly people? A qualitative study of physicians' and nurses' perceptions. *CMAJ : Canadian Medical Association journal = journal de l'Association medicale canadienne.* 2000 Aug 8;163(3):273-7.
18. Medical Research Council. Developing and evaluating complex interventions: new guidance.: Medical Research Council 2008.
19. Richie J, Lewis J. *Qualitative Research Practice A guide for Social Science Students and Researchers.* London: Sage Publications; 2008.
20. Sandelowski M. Sample size in qualitative research. *Research in nursing & health.* 1995;18(2):179-83.
21. Pope C, Ziebland S, Mays N. Analysing qualitative data. *BMJ (Clinical research ed).* 2000 Jan 8;320(7227):114-6.
22. QSR International Pty Ltd. NVivo Qualitative Data Analysis Software Version 10. 2012.
23. Tong. A, Sainsbury. P, Craig. J. Consolidated criteria for reporting qualitative research (COREQ): a 32-item checklist for interviews and focus groups. *Int J Qual Health Care* 2007;19(6):349-57.
24. Strategy for Antimicrobial Resistance in Ireland. Guidelines for Antimicrobial Prescribing in Primary Care in Ireland: Health Service Executive, Health Protection Surveillance Centre. 2011.
25. Health Protection Surveillance Centre. HPSC Publications. 2013 [cited 2013 9 July]; Available from: <http://www.hpsc.ie/hpsc/Publications/>.
26. Institute for Healthcare Improvement. Raising the bar with bundles: treating patients with an all-or-nothing standard. 2006: Available from: [www.ihl.org/IHI/Topics/CriticalCare/IntensiveCare/Literature/RaisingtheBarwithBundles.htm](http://www.ihl.org/IHI/Topics/CriticalCare/IntensiveCare/Literature/RaisingtheBarwithBundles.htm).
27. Broom A, Broom J, Kirby E. Cultures of resistance? A Bourdieusian analysis of doctors' antibiotic prescribing. *Social science & medicine (1982).* 2014 Jun;110:81-8.
28. Charani E, Castro-Sanchez E, Sevdalis N, Kyratsis Y, Drumright L, Shah N, et al. Understanding the Determinants of Antimicrobial Prescribing Within Hospitals: The Role of "Prescribing Etiquette". *Clinical infectious diseases : an official publication of the Infectious Diseases Society of America.* 2013 May 7.
29. Davey P, Brown E, Charani E, Fenelon L, Gould IM, Holmes A, et al. Interventions to improve antibiotic prescribing practices for hospital inpatients. *Cochrane Database of Systematic Reviews.* 2013;4.
30. Arnold SR, Straus SE. Interventions to improve antibiotic prescribing practices in ambulatory care. *Cochrane database of systematic reviews (Online).* 2005(4):CD003539.

- 1
- 2
- 3 31. Fleming A, Browne J, Byrne S. The Effect of Interventions to Reduce Potentially Inappropriate
- 4 Antibiotic Prescribing in Long-Term Care Facilities: a Systematic Review of Randomised Controlled
- 5 Trials. *Drugs & aging*. 2013 Feb 27.
- 6
- 7 32. Tjia J, Gurwitz JH, Briesacher BA. Challenge of changing nursing home prescribing culture.
- 8 *The American journal of geriatric pharmacotherapy*. 2012 Feb;10(1):37-46.
- 9
- 10 33. Hughes CM, Lapane K, Watson MC, Davies HT. Does organisational culture influence
- 11 prescribing in care homes for older people? A new direction for research. *Drugs & aging*.
- 12 2007;24(2):81-93.
- 13
- 14 34. Cabana Md RCSPNR, et al. Why don't physicians follow clinical practice guidelines?: A
- 15 framework for improvement. *JAMA : the journal of the American Medical Association*. [doi:
- 16 10.1001/jama.282.15.1458]. 1999;282(15):1458-65.
- 17
- 18 35. SARI Hospital antimicrobial stewardship working group. Guidelines for antimicrobial
- 19 stewardship in hospitals in Ireland 2009: Available from: [http://www.hpsc.ie/hpsc/A-](http://www.hpsc.ie/hpsc/A-Z/MicrobiologyAntimicrobialResistance/InfectionControlandHAI/Guidelines/File,4116,en.pdf)
- 20 [Z/MicrobiologyAntimicrobialResistance/InfectionControlandHAI/Guidelines/File,4116,en.pdf](http://www.hpsc.ie/hpsc/A-Z/MicrobiologyAntimicrobialResistance/InfectionControlandHAI/Guidelines/File,4116,en.pdf).
- 21
- 22 36. Health Information and Quality Authority. National Quality Standards for Residential Care
- 23 Settings for Older People Ireland,; Health Information and Quality Authority, 2008.
- 24
- 25 37. Pharmaceutical Society of Ireland. Guidance on the supply by Pharmacists in retail pharmacy
- 26 businesses of medicines to patients in residential care settings/nursing homes 2014.
- 27
- 28 38. Health Information and Quality Authority. Draft National Standards for Residential Care
- 29 Settings for Older People in Ireland HIQA. 2014 July
- 30
- 31
- 32
- 33
- 34
- 35
- 36
- 37
- 38
- 39
- 40
- 41
- 42
- 43
- 44
- 45
- 46
- 47
- 48
- 49
- 50
- 51
- 52
- 53
- 54
- 55
- 56
- 57
- 58
- 59
- 60

#### Acknowledgements:

AF conceived the study, conducted the interviews and the analysis and wrote the first draft of the manuscript. SB, CB and SC were involved in the analysis and interpretation of the data. All authors read and approved the final manuscript. Our thanks to the Doctors, Nurses and Pharmacists who agreed to be interviewed for this study. The support of University College London Centre for Behaviour Change Summer School 2014 is kindly acknowledged.

**Supplementary material:****Table A: Consolidated criteria for reporting qualitative studies (COREQ) checklist.**

| <b>Domain 1 : Research team and reflexivity</b>         |                                                                                            |
|---------------------------------------------------------|--------------------------------------------------------------------------------------------|
| <b>Personal characteristics</b>                         |                                                                                            |
| 1. Interviewer                                          | Primary author AF.                                                                         |
| 2. Credentials                                          | PhD Scholar, Pharmacist                                                                    |
| 3. Occupation                                           | PhD Scholar, Pharmacist                                                                    |
| 4. Gender                                               | Female                                                                                     |
| 5. Experience & training                                | Training in qualitative research methods                                                   |
| <b>Relationship with participants</b>                   |                                                                                            |
| 6. Relationship established prior to study commencement | No                                                                                         |
| 7. Participant knowledge of the interviewer             | Yes in a minority of cases (2 GPs, 1 Pharmacist).                                          |
| 8. Interviewer characteristics                          | This was not addressed.                                                                    |
| <b>Domain 2: Study design</b>                           |                                                                                            |
| <b>Theoretical framework</b>                            |                                                                                            |
| 9. Methodological orientation & theory                  | Thematic content analysis mapped to the TDF*.                                              |
| 10.                                                     |                                                                                            |
| <b>Participant selection</b>                            |                                                                                            |
| 11. Sampling                                            | Convenience sampling with maximum variation                                                |
| 12. Method of approach                                  | Telephone invitation                                                                       |
| 13. Sample size                                         | 37 in total                                                                                |
| 14. Non-participation                                   | Did not arise                                                                              |
| 15. Setting of data collection                          | LCTF, GP surgery, Consultant office, Pharmacy                                              |
| 16. Presence of non-participants                        | No                                                                                         |
| 17. Description of sample                               | Outlined in Supplementary material Table A                                                 |
| <b>Data collection</b>                                  |                                                                                            |
| 18. Interview guide                                     | Topic guide drafted, piloted and revised                                                   |
| 19. Repeat interviews                                   | No repeat interviews were conducted                                                        |
| 20. Audio/visual recording                              | Interviews were audio-recorded                                                             |
| 21. Field notes                                         | Recorded after interviews                                                                  |
| 22. Duration                                            | Reported; mean 22mins, range 10-35 mins                                                    |
| 23. Data saturation                                     | Sampling continued until data saturation                                                   |
| 24. Transcripts returned                                | Transcripts were available to participants on request                                      |
| <b>Domain 3: analysis and findings</b>                  |                                                                                            |
| <b>Data analysis</b>                                    |                                                                                            |
| 25. Number of data coders                               | Outlined in the text, four in total                                                        |
| 26. Description of coding tree                          | A coding tree was not developed, themes were mapped to the TDF.                            |
| 27. Derivation of themes                                | Themes were derived from the data by thematic content analysis and then mapped to the TDF. |
| 28. Software                                            | NVivo Qualitative Data Analysis Software version 10.                                       |
| 29. Participant checking                                | This was not conducted                                                                     |
| <b>Reporting</b>                                        |                                                                                            |
| 30. Quotations presented                                | Supporting quotations presented                                                            |
| 31. Data and findings consistent                        | Yes                                                                                        |
| 32. Clarity of major themes                             | A clear presentation of major themes is outlined                                           |
| 33. Clarity of minor themes                             | Variations in views and themes and minor themes are presented.                             |

\*TDF = Theoretical Domains Framework.



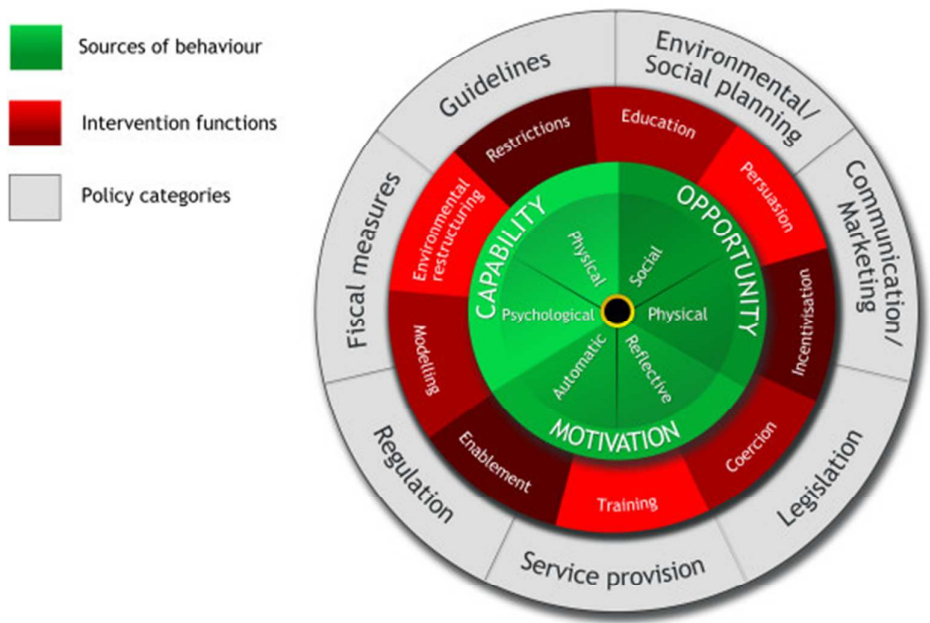

Figure 1. The Behaviour Change Wheel. Source: Michie, Atkins and West <sup>(11)</sup>.

Peer review only

1  
2  
3  
4  
5  
6  
7  
8  
9  
10  
11  
12  
13  
14  
15  
16  
17  
18  
19  
20  
21  
22  
23  
24  
25  
26  
27  
28  
29  
30  
31  
32  
33  
34  
35  
36  
37  
38  
39  
40  
41  
42  
43  
44  
45  
46  
47  
48  
49  
50  
51  
52  
53  
54  
55  
56  
57  
58  
59  
60

# BMJ Open

## Antibiotic prescribing in Long Term Care Facilities; a qualitative, multidisciplinary investigation.

|                                 |                                                                                                                                                                                                                                                                       |
|---------------------------------|-----------------------------------------------------------------------------------------------------------------------------------------------------------------------------------------------------------------------------------------------------------------------|
| Journal:                        | <i>BMJ Open</i>                                                                                                                                                                                                                                                       |
| Manuscript ID:                  | bmjopen-2014-006442.R1                                                                                                                                                                                                                                                |
| Article Type:                   | Research                                                                                                                                                                                                                                                              |
| Date Submitted by the Author:   | 08-Oct-2014                                                                                                                                                                                                                                                           |
| Complete List of Authors:       | Fleming, Aoife; University College Cork, School of Pharmacy<br>Bradley, Colin; University College Cork, Department of General Practice<br>Cullinan, Shane; University College Cork, School of Pharmacy<br>Byrne, Stephen; University College Cork, School of Pharmacy |
| <b>Primary Subject Heading</b>: | Infectious diseases                                                                                                                                                                                                                                                   |
| Secondary Subject Heading:      | Geriatric medicine, Health services research, Public health, Qualitative research, Infectious diseases                                                                                                                                                                |
| Keywords:                       | GERIATRIC MEDICINE, PUBLIC HEALTH, Public health < INFECTIOUS DISEASES, QUALITATIVE RESEARCH, Urinary tract infections < UROLOGY, Respiratory infections < THORACIC MEDICINE                                                                                          |
|                                 |                                                                                                                                                                                                                                                                       |

SCHOLARONE™  
Manuscripts

**Title:****Antibiotic prescribing in Long Term Care Facilities; a Qualitative, multidisciplinary investigation.****Keywords:**

Antimicrobial prescribing, Long-term care, Prescribing behaviour, Interviews, Theoretical Domains Framework, Behaviour Change Technique Taxonomy.

**Authors:**

Aoife Fleming, HRB PhD Scholar in Health Services Research  
School of Pharmacy  
University College Cork  
Cork  
Ireland  
[a.fleming@ucc.ie](mailto:a.fleming@ucc.ie)  
Tel: +353 21 4901690  
(Primary Author and Corresponding author)

Prof. Colin Bradley  
Department of General Practice  
University College Cork  
Cork  
Ireland

Shane Cullinan  
Pharmaceutical Care Research Group  
School of Pharmacy  
University College Cork  
Cork  
Ireland

Prof. Stephen Byrne  
School of Pharmacy  
University College Cork  
Cork  
Ireland  
(Alternate corresponding author. Email: [Stephen.byrne@ucc.ie](mailto:Stephen.byrne@ucc.ie), Tel: +35321 4901658)

**Objectives:**

To explore health care professionals views of antibiotic prescribing in Long Term Care Facilities (LTCFs). To use the findings to recommend intervention strategies for antimicrobial stewardship in LTCFs.

**Design:**

Qualitative semi-structured interviews were conducted. The data were analysed by thematic content analysis. After the interviews, the emerging findings were mapped to the Theoretical Domains Framework (TDF), and the Behaviour Change Wheel and Behaviour Change Technique (BCT) Taxonomy were used to recommend future intervention strategies.

**Participants:**

Interviews were conducted with 37 health care professionals who work in LTCF (10 general practitioners, 4 consultants, 14 nurses, 9 pharmacists) between December 2012 and March 2013.

**Setting:**

Interviews were conducted in the greater Cork region.

**Results:**

The main domains from the TDF which emerged were; 'Knowledge', 'Environmental context and resources', 'Social influences', 'Beliefs about consequences', 'Memory, attention and decision making' with the findings identifying a need for 'Behavioural regulation'. Many participants believed that antibiotic prescribing was satisfactory at their LTCF, despite the lack of surveillance activities.

**Conclusion:**

This study, using the TDF and BCT Taxonomy, has found that antibiotic prescribing in LTCFs is influenced by many social and contextual factors. The challenges of the setting and patient population, the belief about consequences to the patient, the lack of implementation of guidelines and knowledge regarding antibiotic prescribing patterns are significant challenges to address. Based on the study findings and the application of the TDF and BCT Taxonomy some practical intervention functions for antimicrobial stewardship in LTCFs are suggested.

### **Article Summary**

#### **Strengths and Limitations of the study:**

- This study is the first to undertake qualitative interviews investigating antibiotic prescribing in LTCF and to map the findings to the TDF, COM-B model and BCT Taxonomy in order to recommend intervention strategies.
- The study captures the views of the key health care professionals involved in antibiotic prescribing in LTCFs; general practitioners, consultants, nurses and pharmacists.
- The findings indicate that antibiotic prescribing in LTCFs is strongly influenced by the context of health care delivery in LTCFs. There is a need for 'Behavioural regulation' strategies such as antibiotic surveillance in LTCFs, and intervention functions such as setting goals, education, audit, feedback and monitoring may contribute to improved Antimicrobial stewardship in LTCFs.
- All the participants in the study were based in the same region in Ireland and may hold different views to those in other countries or regions. However, the broad sample and depth of discussion offers valuable insights into the Irish LTCF context.

## **Introduction:**

Antibiotic use in Long Term Care Facilities (LTCFs) contributes to the emergence of multi-drug resistant pathogens and healthcare-acquired infections<sup>(1)</sup>. The Royal College of Physicians in Ireland Policy Group on Health Care Associated Infection in Nursing Homes recommends that implementation of best practice for antibiotic stewardship in LTCF and on-going research to guide interventions is necessary<sup>(2)</sup>. In the Irish context, the Healthcare Associated infections in Long Term Care (HALT) point prevalence studies have reported a higher prevalence (10%) of antibiotic prescribing compared to the European average (5%) in 2010 and 2013<sup>(3)</sup>. Internationally, studies have suggested that between 25-75% of antibiotic prescriptions in LTCFs are inappropriate and that antimicrobial resistance (AMR) is rising<sup>(1, 4)</sup>. Quantitative studies investigating antibiotic prescribing in LTCFs have suggested that prescribing patterns are driven by prescriber factors rather than infection prevalence or antimicrobial stewardship initiatives<sup>(5)</sup>. It is necessary to investigate the factors that influence antibiotic prescribing behaviours in LTCFs. In order to capture this information, the views of the health care professionals that are central to this process must be explored. Recent systematic reviews of qualitative studies of antibiotic prescribing behaviour have focussed mainly on the overall primary care or secondary care setting without focusing on the LTCFs setting specifically (6, 7). It is necessary to evaluate LTCF as a separate setting for antibiotic prescribing because patient care is often influenced by factors unique to this setting, such as the co-morbidities of the patient population and organisational culture (8).

The use of theory to understand the mechanisms of action of intervention strategies to change behaviour has been shown to improve the effectiveness of interventions (9). In recent years the Theoretical Domains Framework (TDF) has gained much attention as a potentially overarching theoretical framework to identify the areas where behavioural change interventions can focus (10). The TDF was initially developed in response to requests from implementation researchers who recognised the need for an integrative framework to address the behaviour change factors relevant to intervention studies<sup>(11)</sup>. The TDF has been used in many different types of studies and the framework has been refined and validated<sup>(12)</sup>. It consists of fourteen domains which consist of eighty-four component constructs<sup>(12)</sup>. The framework comprehensively draws together, from thirty-three theories of behaviour, the crucial influences on behaviour (10). The TDF domains are presented in Table 1 with a sample construct. The TDF has been used in qualitative studies to guide the development of interview topic guides and it has also been used as a coding framework in the analysis of qualitative material<sup>(10, 13)</sup>. Researchers in this area have designed a Behaviour Change Wheel which consists of Capability, Opportunity, Motivation and Behaviour components or the COM-B model as it is also known (Figure 1)<sup>(11, 14)</sup>. The corresponding Behaviour Change Technique Taxonomy (BCT Taxonomy) has been developed in order to standardise the content and reporting of intervention studies<sup>(11, 14, 15)</sup>. In previous qualitative studies of antibiotic prescribing in LTCFs a behavioural theory has not been used to inform the evaluation or to identify areas for antimicrobial stewardship (16, 17). In order to fully capture and understand the factors influencing antibiotic prescribing the views of all health care professionals involved in this process is required. The advantage of conducting qualitative investigations before the implementation of an intervention is that the findings can inform the content and delivery of the intervention based on health care professional views and experiences(18).

With increasing rates of AMR and higher than average rates of antibiotic prescribing in Irish LTCFs an in-depth qualitative investigation of the views of all key health care professionals involved in this process is required. The objective of this study is to conduct a theoretically informed qualitative study of the factors influencing antibiotic prescribing in LTCFs. The findings of the study will be analysed using the TDF and BCT Taxonomy to identify key areas to target in antimicrobial stewardship interventions.

| Domain                                   | Definition and example of a construct:                                                                                                                                                                  |
|------------------------------------------|---------------------------------------------------------------------------------------------------------------------------------------------------------------------------------------------------------|
| Knowledge                                | An awareness of the existence of something e.g. procedural knowledge.                                                                                                                                   |
| Skills                                   | An ability or proficiency acquired through practice e.g. competence.                                                                                                                                    |
| Social/Professional Role and Identity    | A coherent set of behaviours and displayed personal qualities of an individual in a social or work setting e.g. professional confidence.                                                                |
| Beliefs about Capabilities               | Acceptance of the truth, reality or validity about an ability, talent or facility that a person can put to constructive use e.g. self-confidence.                                                       |
| Optimism                                 | The confidence that things will happen for the best or that desired goals will be attained e.g. optimism, pessimism.                                                                                    |
| Beliefs about consequences               | Acceptance of the truth, reality or validity about outcomes of a behaviour in a given situation e.g. outcome expectancies.                                                                              |
| Reinforcement                            | Increasing the probability of a response by arranging a dependent relationship, or contingency, between the response and a given stimulus e.g. rewards.                                                 |
| Intentions                               | A conscious decision to perform a behaviour or resolve to act in a certain way e.g. stability of intentions.                                                                                            |
| Goals                                    | Mental representations of outcomes or end states that an individual wants to achieve e.g. goal/target setting.                                                                                          |
| Memory, Attention and Decision Processes | The ability to retain information, focus selectively on aspects of the environment and choose between two or more alternatives e.g. decision making.                                                    |
| Environmental context and resources      | Any circumstances of a person's situation or environment that discourages or encourages the development of skills and abilities, independence, social competence and adaptive behaviour e.g. resources. |
| Social Influences                        | Those interpersonal processes that can cause individuals to change their thoughts, feelings or behaviours e.g. social pressure.                                                                         |
| Emotions                                 | A complex reaction pattern, involving experiential, behavioural and physiological elements, by which the individual attempts to deal with a personally significant matter or event e.g. anxiety.        |
| Behavioural Regulation                   | Anything aimed at managing or changing objectively observed or measured actions e.g. self-monitoring.                                                                                                   |

**Table 1. Theoretical Domains presented with explanatory definition and sample construct. (adapted from Cane *et al.* <sup>(12)</sup>)**

Figure 1. The Behaviour Change Wheel. Source: Michie, Atkins and West <sup>(11)</sup>.

### **Methods:**

#### **Study design:**

Semi-structured interviews were conducted with Nurses, Doctors (Consultants, General Practitioners (GP)) and Pharmacists to investigate their opinions and experiences of antibiotic prescribing in LTCFs

in the greater Cork area. The interview method was the most feasible given that participants were interviewed at their place of work (LTCFs, GP surgeries, Consultants offices, Community pharmacies). The interview method also supports an honest and in-depth account of an individual's experience and opinions (19).

### Sample:

The method of sampling was convenience sampling with maximum variation in order to recruit a variety of participants. The sampling strategy aimed to recruit participants of varying years of experience, from different LTCF settings of varying bed occupancy and from varying funding categories (private, public and voluntary organisations). Participants were recruited by telephone invitation and were located within a 40 kilometre radius of Cork city. Interviews were conducted until data saturation was reached and two extra interviews per health care professional group were conducted to ensure that no new themes were emerging (20, 21).

### Topic Guide & Interviewing:

A topic guide was developed based on a review of previous literature and discussion among the authors and is summarised in Table 2. The topic guide was made relevant to the appropriate health care professional group in terms of the question perspective but the key issues were the same across the board. The domains of the TDF were considered when designing the topic guide but the structure was not restricted by the TDF at this stage to allow for the emergence of unanticipated and unprompted issues during the interviews (19). The topic guide was refined after being piloted by interviewing one Pharmacist and two GPs. Only one of the pilot GP transcripts is included in the final analysis. Ethical approval was obtained from the Clinical Research Committee of the Cork Teaching Hospitals.

**Table 2. Summary of the Interview topic guide.**

| Area                                          | Issues discussed                                                                                                                                                                                                                                |
|-----------------------------------------------|-------------------------------------------------------------------------------------------------------------------------------------------------------------------------------------------------------------------------------------------------|
| Demographic information                       | Years in practice, years working in LTCF.                                                                                                                                                                                                       |
| Process & decision making:                    | Procedure for diagnosing treating infection<br>Challenges in treating infection<br>Involvement with other health care professionals                                                                                                             |
| Knowledge:                                    | Use of or awareness of a guideline for antibiotic prescribing<br>Antibiotics commonly prescribed<br>Knowledge of local antimicrobial resistance patterns<br>Consequences of not prescribing antibiotics<br>Problems associated with antibiotics |
| Strategies to improve antibiotic prescribing: | Current activities, audits or prescribing feedback<br>Areas where more support is needed                                                                                                                                                        |

The one to one interviews were conducted by AF at the participant's place of work (LTCF, GP surgeries, Consultants offices, Community pharmacies), in a quiet room to maintain privacy and confidentiality, at a date and time convenient for them. The purpose of the study was outlined to participants. The interviewer (AF) presented herself as a researcher and did not engage in discussion



1  
2  
3 with the participants about the study or topic guide before the interview so as not to bias their  
4 feedback. Some demographic information was collected. The interviews were audio-recorded, with  
5 participant approval and written informed consent, and the participants were encouraged to think  
6 of specific case examples to elaborate on the topics. The interviewer prompted and explored issues  
7 in more detail as appropriate (19). The interview allowed for the emergence of unprompted  
8 information and themes. All interviews were anonymised and transcribed by AF and preliminary  
9 familiarisation was begun during the transcription process. In this way, data analysis began at an  
10 early stage and the topic guide was constantly reviewed and new topics were introduced throughout  
11 the interview process as needed. The interview transcript was available to the participants on  
12 request. Field notes were recorded after each interview.  
13  
14  
15  
16  
17

### 18 **Analysis:**

19  
20 As described above an iterative process of data collection and analysis was conducted. All transcripts  
21 were coded in QSR Internationals NVivo Qualitative Data Analysis Software version 10<sup>(22)</sup>. The initial  
22 phase of familiarisation involved several readings of the interview transcripts. The transcripts were  
23 initially coded by AF and a coding scheme was developed. Based on the initial familiarisation it was  
24 decided not to analyse the interviews in three separate health care professional groups. This  
25 decision was taken as the topic guide was similar between the groups and similar issues, from  
26 different groups, were emerging throughout all interviews. To ensure consistencies in coding three  
27 coders (AF, SC & SB) independently coded four interview transcripts. The inter-rater reliability was  
28 high and any disagreements were resolved by discussion. Participants own language was often used  
29 in the naming of codes in order to maintain a faithful representation of their opinions and  
30 experiences. The codes or specific beliefs were then attributed to the domains of the TDF. The next  
31 stage involved identifying what behaviours needed to change and in what methods could be  
32 recommended to achieve this. This was conducted by mapping the TDF domains to the Behaviour  
33 Change Wheel, specifically the Capability, Opportunity and Motivation components<sup>(11)</sup>. The  
34 appropriate BCT Taxonomy (version 1) was applied to suggest intervention functions for  
35 antimicrobial stewardship in LTCF. A completed checklist of the Consolidated criteria for Reporting  
36 qualitative research (COREQ) is presented in the Supplementary material Table A<sup>(23)</sup>.  
37  
38  
39  
40  
41  
42  
43  
44

### 45 **Results:**

46 Thirty-seven interviews were conducted in total (14 Doctors (10 GPs, 4 Consultants), 14 Nurses and 9  
47 Pharmacists) from a range of LTCF settings. Participant detail is provided in Table 2. The interviews  
48 ranged from 10 minutes to 35 minutes (mean interview length 22 minutes). The key themes are  
49 presented by means of the relevant domain from the TDF. Participant quotes are represented in  
50 italics by profession (General Practitioner = GP, Consultant = C, Nurse= N and Pharmacist = P) and  
51 the corresponding number refers to their details in Table 3.  
52  
53  
54  
55  
56  
57  
58  
59  
60

| Doctor (General Practitioners) | Gender | Years medical experience     | LTCF category & bed occupancy                                     | Years of experience in LTCF |
|--------------------------------|--------|------------------------------|-------------------------------------------------------------------|-----------------------------|
| 1.                             | F      | 15                           | Private (12 patients in a LTCF)                                   | 15                          |
| 2.                             | F      | 15                           | Public/private, (63 bed LTCF)                                     | 8                           |
| 3.                             | F      | 2                            | 1 Public, 1 Private                                               | 2                           |
| 4.                             | M      | 9                            | Private (14 patients in a LTCF)                                   | 9                           |
| 5.                             | F      | 10                           | Private (15 patients in a LTCF)<br>Public (20 patients in a LTCF) | 8                           |
| 6.                             | M      | 1                            | Private (10 patients in a LTCF)                                   | 1.5                         |
| 7.                             | M      | >20                          | Private (>100 in total)                                           | >20                         |
| 8.                             | M      | 19                           | Voluntary (>100 in total)                                         | 19                          |
| 9.                             | M      | >30                          | Mixed setting (patient number varies)                             | >30                         |
| 10.                            | M      | 5                            | Mixed setting (patient number varies)                             | 5                           |
| Doctor (Consultant)            | Gender | Speciality                   | LTCF category                                                     | Years of experience in LTCF |
| 1.                             | M      | Geriatrician                 | Public, voluntary                                                 | >5                          |
| 2.                             | M      | Geriatrician                 | Public                                                            | >5                          |
| 3.                             | F      | Geriatrician                 | Public                                                            | >5                          |
| 4.                             | M      | Microbiologist               | Public, private, voluntary                                        | >5                          |
| Pharmacist                     | Gender | Years of pharmacy experience | LTCF category (range bed occupancy)                               | Years of experience in LTCF |
| 1.                             | M      | 15                           | Public, (48)                                                      | 5                           |
| 2.                             | F      | 8                            | Public & Private (13-250)                                         | 8                           |
| 3.                             | F      | 30                           | Private (40-120)                                                  | 7                           |
| 4.                             | F      | 5                            | Private (40-120)                                                  | <1                          |
| 5.                             | M      | 35                           | Private (50-60)                                                   | 20                          |
| 6.                             | F      | 1                            | Private (25)                                                      | 1                           |
| 7.                             | M      | 14                           | Private (25)                                                      | 14                          |
| 8.                             | F      | 18                           | Public (>150)                                                     | 2                           |
| 9.                             | M      | 15                           | Public (38)                                                       | 5                           |
| Nurse                          | Gender | Years of nursing             | LTCF category                                                     | Years of experience in LTCF |

|                                                   |   | experience |                     |    |
|---------------------------------------------------|---|------------|---------------------|----|
| 1. Staff nurse                                    | F | 21         | Private (50)        | 4  |
| 2. Staff nurse                                    | F | 10         | Private (50)        | 4  |
| 3. CNM                                            | F | 25         | Public (40)         | 11 |
| 4. Staff Nurse                                    | F | 16         | Public (40)         | 5  |
| 5. CNM                                            | F | 15         | Public (38)         | 12 |
| 6. Advanced Nurse Practitioner & Nurse Prescriber | F | 26         | Public (>100)       | 19 |
| 7. CNM                                            | F | 41         | Voluntary (>100)    | 6  |
| 8. Staff Nurse                                    | F | 30         | Voluntary (30)      | 30 |
| 9. Staff Nurse                                    | F | 11         | Public (38)         | 11 |
| 10. CNM & Nurse prescriber                        | F | 33         | Public (38)         | 26 |
| 11. CNM                                           | F | 32         | Public/Private (60) | 20 |
| 12. Staff Nurse                                   | F | 11         | Public/private (60) | 3  |
| 13. IPCN <sup>#</sup>                             | F | 15         | Public (multi-site) | 10 |
| 14. IPCN                                          | F | 15         | Public (multi-site) | 10 |

**Table 3. List of participants interviewed, years of experience and LTCF setting.**

F = Female, M = Male. \*CNM = Clinical Nurse Manager.

<sup>#</sup>IPCN= Infection Prevention and Control Nurse.

### **Theoretical Domains Framework:**

The analysis identified key domains of the TDF that were found to be relevant and they are described below. The other domains that were not identified (Optimism, Reinforcement, Intentions, Goals and Emotions) are not discussed as not enough references to the relevant constructs were made.

### **Knowledge:**

It was decided to merge the domains 'Knowledge' and 'Skill' as the constructs emerging were overlapping and most findings related to the knowledge factors. The participants did not report that challenges in diagnosing and treating patients in LTCF was due to a lack of skills or need for further training in undertaking physical tasks. Knowledge of antibiotic guidelines was variable among all participants. Many participants, from all professions, were not aware of the Guidelines for Antimicrobial Prescribing in Primary Care 2011 or of the Health Protection Surveillance Centre (HPSC) guidelines for the management of catheter and non-catheter related urinary tract infections<sup>(24, 25)</sup>. In most cases participants report a passive, rather than active, disregard of guidelines. Nurses in the public setting were more aware of HPSC guidelines but reported that they are not often adhered to.

*"so we have all the antibiotic guidelines, we have the primary care guidelines for antibiotic prescribing which don't give you exact antibiotics to prescribe. Like generally we use the CUH [Cork University Hospital], MUH [Mercy University Hospital] ones do you know those antimicrobial guidelines." (GP2)*

1  
2  
3 The interpretation of urine samples from catheterised patients poses a challenge in LTCFs.  
4 Asymptomatic bacteriuria is an area where Doctors and Nurses felt unsure about whether to  
5 prescribe antibiotics or not. Several Consultants identified that this is often an area of antibiotic  
6 overuse.  
7

8  
9 *“That is a big bug bear of mine, the UTI, the old person with a UTI, it drives me crazy. Every old  
10 person has a UTI and I’d say at least once a day I say to somebody ‘you know if you take a room full  
11 of frail old people half of them will have dirty urine, it doesn’t mean they have a UTI.’”* (C2) (UTI =  
12 Urinary Tract Infection).  
13

14 Many participants conveyed confidence in their clinical knowledge due to their years of experience  
15 in LTCF practice and their in-depth knowledge of the individual patients.  
16

17  
18 *“So it can be very difficult to know, you are going by a bit of guesswork, a bit of analysis of results, a  
19 bit of examination, a bit of the history from the nurse, it depends on how well the nurse knows them  
20 as well, how changed they are from their usual baseline. Then you make a decision. You probably  
21 have a lower threshold for using antibiotics in long term care facilities because of all of those  
22 factors.”* (GP9)  
23  
24

25  
26 In terms of clinical knowledge of the different antibiotics and their indications it was evident that  
27 this varies between participants. Detailed knowledge of antibiotic microbiological coverage or  
28 recommended infection indication was not displayed or reported in the findings. Participants were  
29 more likely to refer to ‘strong antibiotics’ and only rare references to ‘first line antibiotics’ were  
30 made. All participants are aware that AMR is a growing public health problem and that overuse of  
31 antibiotics is a contributory factor but few had any insight into local AMR data or referred to AMR as  
32 a serious problem in their LTCF.  
33  
34

35 *“... we only have a problem with resistance when it comes to urine infections because that is where I  
36 think we are over-treating.”* (GP4).  
37

38 Closely aligned to ‘Knowledge’ findings are the themes from the ‘**Belief of capabilities**’ domain.  
39 Nurses expressed confidence in providing a high quality of care for the patients and that the more  
40 qualified Nurses, Nurse Prescribers and Clinical Nurse Managers provide a valuable support to all  
41 nurses.  
42  
43

44 *“...she is very good (nurse manager) and very with it and she links up with the doctors quite a bit. If  
45 she has an issue they really listen to her as well.”* (N4)  
46

47 Doctors also expressed professional confidence in caring for LTCF patients with infection. Guidelines  
48 are seen as a useful reference but deviations from the guidelines were justified by relying on their  
49 own, or on Nurses, clinical judgement and expertise.  
50  
51

52 *“nothing in medicine is black and white so you can’t have guidelines, guidelines are just that, they are  
53 guidelines not protocols. I mean that is the difference people need to understand, protocols are  
54 something you have to stick to”* (GP4)  
55

56 *“I have no issue with guidelines you know. I think the most important thing is that when veering  
57 away from guidelines is justifying what we are doing.”* (GP7)  
58  
59

1  
2  
3 *"You don't want them (nurses) to see somebody in the bed who they are worried about and say oh*  
4 *she's not ticking such a box so I'm not going to ask the doctor to see her"* (GP1)

5  
6 The Pharmacists interviewed expressed confidence in the medicines management service they  
7 provide to the LTCF but are less empowered in terms of expanding their clinical role. The reasons for  
8 this are the lack of time and the need for further training and guidelines in this area.

9  
10  
11 *"I think if they had more structured antibiotic CPD for antibiotics in nursing homes and even for*  
12 *pharmacies if we had more specific stuff it would be a big help."* (P4). (CPD= Continuing Professional  
13 Development).

14  
15  
16 *"I would be fairly confident but sure I have all the resources here so I can have a quick look and go*  
17 *through them, I wouldn't know all of it off the top of my head, some of it I would."* (P9).

18  
19 *"I would like to be involved in some sort of you know developing some sort of protocol or guidelines*  
20 *within the nursing home, provided we are given the resources and the time to do that with a*  
21 *multidisciplinary team..."* (P2).

#### 22 23 24 **Social/professional role and identity:**

25  
26 The responsibility for antibiotic prescribing was clearly assigned to the Doctor but interestingly the  
27 key role of the Nurse in that process was also conveyed by all professions.

28  
29  
30  
31  
32 *"I would be the one dealing with the GPs all the time on their rounds...so even though I think so and*  
33 *so might need an antibiotic or whatever, it is the doctors call in the end."* (N3)

34  
35  
36  
37 *"the way we operate is it is a nursing led facility and we come in to support that nursing lead. We are*  
38 *very lucky with the level of clinical nurse specialists that are there. So they have that higher training*  
39 *in dealing with elderly people, so they provide the care effectively and they rope us in then if there*  
40 *are issues that they are unhappy with or if there are issues as regards to prescribing. So we get*  
41 *involved if they have a concern about a patient or regarding a possibility or probability of infection."*  
42 (GP7)

43  
44  
45 It was reported that between Doctors, antibiotic prescribing practices vary in terms of the volume of  
46 and choice of antibiotics prescribed. It was reported several times that out-of-hours Doctors are  
47 often more likely to prescribe antibiotics. The main reason to explain this is that the patient is  
48 generally sicker if a Doctor has to visit out of hours and an antibiotic is prescribed to avoid  
49 hospitalisation or a revisit.

50  
51  
52 *"you know if they are calling SouthDoc the patient has a fever, clinical signs, a bad cough, you are*  
53 *probably more likely to prescribe than not."* (GP9)

54  
55 (SouthDoc is the out-of-hours doctors service in the greater Cork region.)

56  
57 The difficulties, as reported by an out-of-hours Doctor, are that they do not know the patient's  
58 medical history, they have limited diagnostic equipment, the patient is often very ill and they may be  
59  
60 Page 11 of 24

1  
2  
3 under pressure from the patient's family or Nurse to prescribe. Some GPs reported that out-of-hours  
4 Doctors may not prescribe first line antibiotics.

5  
6 *"...you are called as an out of hours doctor you often times have little option but to prescribe an*  
7 *antibiotic because you don't know the patient, you don't know the staff, you often don't know the*  
8 *background and you may not have complete notes in the history"* (GP5)  
9

10  
11 The role of the Pharmacist in antimicrobial stewardship has not developed considerably in LTCFs  
12 based on the reports of those interviewed. Some reported that they already attend clinical  
13 multidisciplinary meetings with the GPs and Nurses and would welcome the opportunity to engage  
14 in this further, with support and appropriate training to improve knowledge. Others referred to the  
15 lack of time to engage in antimicrobial stewardship and that the priorities for Pharmacists in LTCFs  
16 were other medicines management issues.  
17

18  
19 *"In terms of antibiotics I don't know necessarily if there is a huge role there, there are roles in other*  
20 *medicines management issues but not particularly antibiotics."* (P9)  
21

### 22 23 **Social influences:**

24  
25 The social context within which antibiotics are prescribed in LTCFs is clearly evident in the findings.  
26 The influence of Nurses on Doctors decisions when managing patients with infection, especially  
27 when the decision to prescribe an antibiotic or not is made, was referred to frequently and by all  
28 groups of professionals. The Nurses act in a gatekeeper role by communicating patient care issues  
29 and organising clinical assessments by the Doctor when they visit the LTCF. In some cases their  
30 influence in the decision making process of whether to prescribe an antibiotic can be felt as a  
31 pressure by doctors.  
32

33  
34 *"...they certainly guide us in our prescribing, they are probably, I don't know is this a fair or unfair*  
35 *thing to say but they are probably happier when we prescribe because at least they know something*  
36 *has been treated "* (GP2)  
37

38  
39 *"You sometimes feel that you do come under pressure to prescribe, and you have to sort of avoid that*  
40 *you know."* (GP8)  
41

42  
43 *"Sometimes the doctors are guided by what we would suggest and what we feel or think. I suppose*  
44 *they just kind of, they are of the opinion we are with the patient so much more than they are but*  
45 *some doctors, definitely not all of them, some of them would defer to the nurse a little bit."* (N9)  
46

47  
48 On the other hand, some Nurses also discussed their influence on Doctors in terms of delaying  
49 antibiotic prescriptions by suggesting 'watchful waiting' or that the Doctor would reassess the  
50 patient in a few days and reconsider the need for an antibiotic at that point.

51  
52 The role of the Pharmacist is mainly in screening for drug interactions and providing medicines  
53 information, rather than influencing the antibiotic prescribing process. The influence of residents'  
54 family on Doctors and Nurses to assess their relative occurs but was not linked to a pressure to  
55 prescribe an antibiotic. Families tend to be satisfied once the Doctor has made a clinical assessment,  
56 even if they don't prescribe an antibiotic. The importance of including the families in the decision  
57 making process and establishing goals of care for patients was underlined by many Doctors, and  
58 interestingly by all the Consultant Geriatricians.  
59

60 Page 12 of 24

1  
2  
3 *"...the family would be insistent on them being seen by a doctor most of time and influence the nurse*  
4 *to call you but once you come and see them and assess them, no it would be uncommon that they*  
5 *would insist on an antibiotic."* (GP9)  
6

7 *"My feeling about prophylactic antibiotics for UTIs and stuff is I ask the family and the patient ' do*  
8 *you feel it is helping or making a difference' and if it isn't I stop it. "* (C2)  
9

#### 10 **Environmental context & resources:**

11  
12 The key contextual issue raised is that the management of infection in LTCFs is complicated by a high  
13 level of co-morbidity, cognitive impairment and dementia in these patients. The lack of diagnostic  
14 equipment and interpretation of microbiology results is a significant challenge for Doctors and  
15 Nurses. They also reported that these elderly patients do not always have a high temperature on  
16 infection and are often not able to communicate their symptoms. This links to 'Social Influences' as  
17 Doctors depend greatly on Nurses support to detect patients signs of infection. The restricted access  
18 to a Doctor was also a challenge to this process as many LTCFs do not have an on-site Medical  
19 Officer but receive care from GPs who visit infrequently or only on request. Often, due to time  
20 constraints, this can lead to antibiotic prescribing 'over the phone' which one GP referred to as  
21 prescribing for "doctor reasons rather than patient reasons or bacteriological reasons" (GP6). These  
22 challenges are all explicitly linked to an increase in antibiotic prescribing by many participants.  
23

24  
25 *"I think most of them end up getting an antibiotic to treat as a caution even though maybe it is not*  
26 *as indicated as it would be in the community"* (GP2)  
27

28  
29 *"You sometimes feel that you are prescribing in those situations without a very definite bug or*  
30 *infection."* (GP6)  
31

32  
33 *"Occasionally if it is symptomatic UTI you may prescribe over the phone and see how they go. If it is*  
34 *not responding then you obviously need to go see them."* (GP5)  
35

36  
37 Due to the plethora of clinical issues for discussion at the clinical multidisciplinary teams meetings  
38 antimicrobial stewardship was not reported as a key item on the agenda. There are numerous other  
39 competing demands on time during the Doctors visit to the LTCF and during the clinical meetings.  
40 Participants reported that the regulation of LTCFs by the Health Information and Quality Authority  
41 (HIQA) ensures that medication management procedures and Pharmacist medication reviews are  
42 implemented. It was implied that antibiotic audits are only ever conducted to fulfil quality  
43 improvement requirements rather than to influence clinical practice. The organisational culture  
44 within LTCFs, however, impedes many extra clinical and quality improvement activities because  
45 time, and perhaps motivation, is not available.  
46

47  
48 *"at the moment there is a linked up thinking between the nursing home and the pharmacy... the*  
49 *triangle isn't complete yet where the GP is involved...there are some GPs who would be into going*  
50 *clinical meetings and having clinical meetings, others wouldn't be".* (P7)  
51

52  
53 *"since HIQA have leant on them a small bit it is far more detailed, there is a far more joined up*  
54 *thinking between pharmacy and the home and we have established a set of I suppose a complete*  
55 *medicine management system"* (P7)  
56  
57  
58  
59

1  
2  
3 *"Then I suppose all it needs is someone like HIQA or the ICGP or the pharmacy crowd to come and*  
4 *say 'look lads you are not practicing properly unless you are doing this' then GPs do adhere to it, they*  
5 *will certainly adhere to it if they are told it is best practice and they all try to adhere to best practice."*  
6 (GP2) (ICGP: Irish College of General Practitioners).  
7

8  
9 The domains 'Environmental context and resources' and '**Beliefs about Consequences**' are closely  
10 aligned. The potential harm or hospitalisation of a vulnerable, co-morbid LTCF patient if an antibiotic  
11 is not prescribed is a concern to Doctors and Nurses. The general consensus was that over-  
12 treatment with antibiotics and subsequent care in the LTCF is preferred and that hospitalisation  
13 should be avoided if at all possible. The domain 'Emotion' is relevant here as participants spoke  
14 about fear of the patient coming to harm because of their decision.  
15

16  
17 *"...if that means you prescribe the odd antibiotic excessively, I think for the resident most times it's a*  
18 *better scenario for the individual than ending up in an A&E department because of an untreated*  
19 *infection. It's a balancing act really."* (GP1)  
20

21  
22 *"...you say look we will hold off on the antibiotic and I have certainly been caught once with a*  
23 *patient who then developed pyelonephritis and was sick and so that learns you alright."* (GP7).  
24

25 There is a lack of acknowledgement that antibiotic prescribing in LTCFs contributes to the public  
26 health problem of AMR. Many references to AMR associated it with antibiotic prophylaxis and that it  
27 was not common among the patients in the LTCF. There was little discussion about how to avoid the  
28 development of AMR and a sense of inevitability regarding this unavoidable problem was evident.  
29

30  
31 *"...writing a prescription for an antibiotic is seen as an action or a response, a quick action or a quick*  
32 *response to some problem... I would doubt that resistance is at the forefront of that decision at that*  
33 *time."* (C3)  
34

### 35 **Memory, attention and decision processes:**

36 The variability and complexity of the decision making process is evident by the findings attributed to  
37 the aforementioned TDF domains. For many Doctors this decision making process is a culmination of  
38 the factors already outlined resulting in a '*balancing act*' as they make a risk-benefit assessment of  
39 the patients need for an antibiotic. The fear of the consequences for the patient and the uncertainty  
40 around the diagnosis of infection in LTCF patients was clearly linked to the overprescribing of  
41 antibiotics in LTCFs by many participants. Much discussion centred on the decision of whether to  
42 prescribe an antibiotic or not, with much less thought given to the decision around which antibiotic  
43 to prescribe.  
44

45  
46  
47 *"I think if you wait and if the person gets sicker you are kind of damned and if you give them an*  
48 *antibiotic and they really did not have an infection and something else happens to them you are*  
49 *damned."* (C1)  
50

51  
52 *"you probably do end up prescribing more for the elderly than you would for you or me who are*  
53 *younger, in the fact that you are always slightly worried that if you don't prescribe then they will get*  
54 *worse."* (GP8)  
55

56  
57 The decision making autonomy and individual patient care approach dominates the decision making  
58 process for Doctors and Nurses. Their attention is focussed on the patient's clinical presentation,  
59



1  
2  
3 medical history and in some cases the overall care plan. As outlined in 'Beliefs about consequences',  
4 the public health threat of AMR does not influence this decision.  
5

6  
7 *"I would look to see do they have a temperature, not all the elderly will develop a temperature, some*  
8 *of them are immuno-compromised for various reasons so they don't always necessarily have a*  
9 *temperature. So looking at sats, looking at clinical findings, looking at have they gone off food, are*  
10 *they obviously unwell in themselves. I think that is one thing that sometimes guidelines don't*  
11 *capture. They don't capture that sort of, they will have criteria set down but they don't cover that*  
12 *sort of knowing the patient bit."* (GP1)  
13

14  
15 Several participants acknowledged the valuable support of guidelines to help clinical decision  
16 making. Nurses and Pharmacists reported that guidelines are an effective way to ensure that all  
17 health care professionals were practicing evidence based medicine and that they are a necessity  
18 when dealing with outbreaks of infection.  
19

20  
21 *"I think there needs to be clear guidelines and protocols in each setting regarding antibiotic use. I do*  
22 *tend to think that there is just generic broad spectrum prescribing of different types of infections*  
23 *without actually doing any sensitivity testing."* (P2)  
24

25 This leads to the important domain of '**Behavioural regulation**'. The extent of self-monitoring by  
26 means of antibiotic surveillance or audit is low and any reported activities generally consisted of  
27 participation in the HALT point prevalence studies in some, but not all, of the LTCFs. Participants  
28 from all groups welcomed the idea of surveillance and reviewing antibiotic prescribing practices and  
29 felt that this would contribute to improving patient care. Doctors were somewhat cautious and  
30 several expressed doubt about conducting audits which judge an antibiotic prescription as being  
31 appropriate or not. Benchmarking audit results with other centres was not viewed as being a  
32 particularly useful exercise by many Doctors.  
33  
34

35  
36 *"Comparing to other centres, yes but so what? What you are going to do is compare your errors*  
37 *really to their errors. What you need to do is to compare to what you should be doing and see if that*  
38 *can be implemented, if you can do that."* (GP6)  
39

40  
41 A few participants made suggestions for information technology solutions such as decision support  
42 systems to guide decision making but that a lack of resources would rule out that option.  
43

44  
45 *"So I suppose the first thing is the guidance is there, the second thing then is education around the*  
46 *guidance and then you have got to audit it. So it is a cycle, you know the cycle, but whether the*  
47 *government is willing to actually you know follow through with that, that is the big problem, with*  
48 *that is that some investment needs to be made in the education and then people can use it as an*  
49 *audit for their continuing medical education and their medical counsel requirements."* (GP1)  
50

### 51 **Application of BCT Taxonomy and identification of potential Intervention functions:**

52  
53 The BCT Taxonomy (version 1) has been developed in order to improve the design and  
54 implementation of interventions<sup>(14)</sup>. In the COM-B model Capability, Motivation and Opportunity  
55 interact to generate Behaviour<sup>(11)</sup>. Capability represents an individual's physical and psychological  
56 ability to undertake an activity. Opportunity represents all the factors outside the individual, social  
57 and physical, that prompt behaviour or make it possible. Motivation involves the brain processes,  
58  
59  
60  
61

1  
2  
3 automatic and reflective, that direct behaviour. The principles of the COM-B model have been  
4 applied to the findings of this study to recommend strategies for antimicrobial stewardship in LTCFs  
5 as outlined in Table 4. The detailed taxonomy has been applied in order to guide the standardisation  
6 of intervention content design and reporting <sup>(11)</sup>. The key strategies are; Setting Goals, Education,  
7 Audit, Feedback and Monitoring. These strategies have been selected based on the APEASE criteria  
8 (Affordable, Practical, Effective/cost-effective, Acceptable, Safe and Equitable)<sup>(11)</sup>. Many of the  
9 intervention functions were suggested by or discussed with the study participants, thereby  
10 improving the likelihood of acceptability in the future. If monitoring and feedback of antibiotic  
11 prescribing was introduced, it is possible that comparing or bench-marking the results to other LTCF  
12 would motivate health care professionals to reflect on and change their prescribing patterns. The  
13 TDF domains Goals and Intentions, which were not represented in the study findings, have been  
14 included because clear targets for antimicrobial stewardship are required to motivate behaviour  
15 change. Financial Incentivisation is suggested but is not likely to be a realistic option as a change to  
16 Irish health care policy would be required.  
17  
18  
19  
20  
21  
22  
23  
24  
25  
26  
27  
28  
29  
30  
31  
32  
33  
34  
35  
36  
37  
38  
39  
40  
41  
42  
43  
44  
45  
46  
47  
48  
49  
50  
51  
52  
53  
54  
55  
56  
57  
58  
59  
60

**Table 4. Suggested Intervention strategies identified by applying the TDF and BCT Taxonomy (version 1) to the study findings<sup>(11)</sup>.**

| TDF domain                                                                                                                                                                              | COM-B*                               | BCT Taxonomy                                                           | BCT Label                                                                                                                                                               | Strategy examples (with Intervention function underlined)                                                                                                                                                                                                                               |
|-----------------------------------------------------------------------------------------------------------------------------------------------------------------------------------------|--------------------------------------|------------------------------------------------------------------------|-------------------------------------------------------------------------------------------------------------------------------------------------------------------------|-----------------------------------------------------------------------------------------------------------------------------------------------------------------------------------------------------------------------------------------------------------------------------------------|
| Behavioural regulation.<br>Goals. Intentions.<br>Social/Professional roles & identity.                                                                                                  | C-(Psych.)<br>M-(Refl.)              | <b>Goals &amp; Planning</b>                                            | Goal Setting (Outcome).<br>Action Planning.<br>Review outcome goals.                                                                                                    | <b>Enablement:</b> Set targets for antibiotic usage.<br>Use Antibiotic 'Care Bundles'**                                                                                                                                                                                                 |
| Knowledge. Memory, attention & decision making processes.<br>Behavioural Regulation.<br>Beliefs about capabilities.<br>Optimism.                                                        | C-(Psych.)<br>C-(Phys.)<br>M-(Refl.) | <b>Shaping knowledge, Natural consequences, Comparison of outcomes</b> | Instruction on how to perform behaviour.<br>Information about health consequences.<br>Credible source.                                                                  | <b>Education:</b> information about antibiotics, guidelines & AMR.<br><b>Persuasion:</b> Present information to emphasise importance of not prescribing antibiotics inappropriately. Persuasive communication of information, supported by Consultant Microbiologists & Geriatricians.  |
| Environmental context.<br>Memory, attention & decision making processes.                                                                                                                | O-(Phys.)<br>C-(Psych.)<br>C-(Phys.) | <b>Antecedents, Associations</b>                                       | Restructuring the physical environment.<br>Prompts/cues.<br>Adding objects to the environment.                                                                          | <b>Environmental restructure/enablement:</b><br>Reduce/remove LTCF stock of non-first line antibiotics (Restriction).<br>Provide copies of the guidelines & supporting evidence.<br>Use antibiotic 'Care Bundles'.                                                                      |
| Knowledge. Memory, attention & decision making processes.<br>Behavioural Regulation.                                                                                                    | C-(Phys.)<br>C-(Psych.)<br>M-(Auto.) | <b>Repetition &amp; substitution</b>                                   | Behavioural practice/rehearsal                                                                                                                                          | <b>Training:</b> Practice referring to the Guidelines in daily practice                                                                                                                                                                                                                 |
| Social Influences.                                                                                                                                                                      | O-(Soc.)                             | <b>Social support</b>                                                  | Social support (practical).                                                                                                                                             | <b>Persuasion &amp; Enablement:</b> Encourage Doctors, Nurses & Pharmacists to promote guideline & 'Care Bundle' implementation                                                                                                                                                         |
| Goals. Beliefs about Consequences & Capabilities. Memory, attention & decision making processes.<br>Behavioural Regulation.<br>Social/Professional roles & identity. Social Influences. | M-(Refl.)<br>C-(Psych.)<br>O-(Soc.)  | <b>Feedback &amp; Monitoring, Comparison of outcomes, Identity.</b>    | Feedback on outcome of behaviour<br>Discrepancy between current behaviour & goal.<br>Incompatible beliefs.<br>Information about others' approval.<br>Social comparison. | <b>Persuasion:</b> Audit & feedback of antibiotic prescribing & 'Care Bundles'.<br><b>Enablement:</b> Outline deviations from guidelines/evidence based practice.<br><b>Persuasion:</b> Bench-mark antibiotic usage against other LTCF.<br>Consultant review of antibiotic prescribing. |
| Reinforcement. Knowledge.<br>Beliefs about Capabilities.<br>Social/Professional roles & identity.                                                                                       | C-(Psych.)<br>M-(Refl.)              | <b>Reward &amp; threat, Scheduled consequences.</b>                    | Knowledge.<br>Incentive (outcome).<br>Reward approximation/completion.                                                                                                  | <b>Incentivisation:</b><br>Positive reinforcement from Consultants of audit results.<br>Financial incentive will be provided if antibiotic prescribing targets met/'care bundles' implemented.                                                                                          |

\***COM-B components:** C-(Psych) = Psychological Capability, C-(Phys) = Physical Capability, O-(Soc) = Social opportunity, O-(Phys) = Physical Opportunity, M-(Refl) = Reflective Motivation, M-(Auto) = Automatic Motivation.

\*\***Care bundle:** A care bundle is a collection of processes needed to effectively and safely care for patients undergoing particular treatments with inherent risks. Several interventions are 'bundled together' and, when combined, significantly improve patient outcomes<sup>(26)</sup>.

### **Discussion:**

This is one of the first studies to investigate the views of health care professionals in LTCFs about antibiotic prescribing and to use a behavioural change theory to analyse the findings and suggest intervention strategies for antimicrobial stewardship. The findings have provided valuable information to understand the LTCF antibiotic prescribing culture in great detail. The challenges relating to antimicrobial prescribing in LTCFs were identified along with many broad issues at play such as the organisational culture of LTCFs and health care delivery in LTCFs. This study has found that the antibiotic prescribing process is complicated in LTCFs and influenced by social, cultural and contextual issues. The TDF has proven to be a very useful tool for the analysis of the interview findings in order to encompass the factors influencing the prescribing of antibiotics. Previous qualitative studies of antibiotic prescribing in LTCFs identified the challenges of diagnosing infection in LTCFs, the social pressures from family and nurses, and the variation in practice between different health care professionals, without investigating the findings from a theoretical perspective (16, 17). This study contributes to the knowledge base by providing more evidence to support the importance of behavioural regulation as a strategy for antimicrobial stewardship. The application of the findings to the COM-B model and the BCT Taxonomy has provided suggestions for appropriate intervention functions on which to model future antimicrobial stewardship interventions. The results indicate that several intervention functions such as education around guidelines, audit and feedback to measure performance, and guidance and persuasion by experts in the field, would target the domains identified by the TDF. When the main findings are distilled, the 'behavioural diagnosis' of the relevant COM-B components finds that a key driver for change and antimicrobial stewardship in LTCFs is Motivation. It is evident from the findings that antibiotic prescribing in LTCFs is influenced by social and environmental challenges rather than by antimicrobial stewardship results and strategies. In order to raise antimicrobial stewardship as a priority item for patient care and quality improvement all Doctors, Nurses and Pharmacists involved in LTCFs need to be motivated to reflect on current practice by undertaking antibiotic surveillance in the LTCFs.

An important finding of this study is that sub-optimal or inappropriate antibiotic prescribing is not something the LTCF participants believed was happening in their LTCF. In similar studies with hospital doctors, sub-optimal antibiotic prescribing has been admitted openly and is almost accepted as an inevitable outcome of patient care<sup>(27)</sup>. In the hospital setting sub-optimal antibiotic prescribing was accounted for by Doctors' benevolence, unwillingness to challenge the hospital medical hierarchy and a coping mechanism for time pressures<sup>(27, 28)</sup>. This study found that most LTCF health care professionals reported satisfactory practices but were not able to support these beliefs with facts as no surveillance activities were in place. This reinforces the need for on-going behavioural regulation measures in LTCFs, as is conducted in most hospital settings. Antibiotic stewardship strategies are commonly classified as persuasive (education, audit and feedback) or restrictive (restricted formulary, prior authorisation) or structural (e.g. computer decision support systems)<sup>(29)</sup>. A systematic review of interventions to improve antibiotic prescribing in hospitals recommends that both groups of techniques improve patient outcomes and reduce AMR, but that restrictive techniques should only be used when urgent<sup>(29)</sup>. In ambulatory care, multi-faceted interventions involving educational techniques work best when local barriers to change are addressed<sup>(30)</sup>. A systematic review of trials to improve antibiotic prescribing in LTCFs found that

1  
2  
3 educational sessions and material, involving local consensus with staff, are generally acceptable but  
4 the results of most studies were modest and not sustained <sup>(31)</sup>. This suggests a greater need to  
5 investigate the behavioural reasons to explain these trial results and the use of intervention  
6 functions which sustain motivation for change.  
7

8  
9 The challenge of designing and delivering antimicrobial stewardship interventions in LTCFs may be  
10 compounded by the unique organisational culture present which is different to the hospital and  
11 primary setting. It has been well acknowledged that LTCFs have a wide variety of organisational  
12 models and service delivery structures e.g. Nurse to resident ratio, access to Doctor, access to  
13 diagnostic equipment or microbiology results <sup>(32)</sup>. The influential role of nurses, the variability in  
14 practices between LTCFs, the ethical considerations of caring for patients with dementia and at the  
15 end of their life, are all characteristic features of LTCF services that must be considered when  
16 planning quality improvement strategies (8). The Schein model of organisational culture, as  
17 previously discussed by Hughes *et al.*, suggests that in order to truly understand an organisation a  
18 deeper knowledge of the underlying assumptions needs to be analysed, and not just the observable  
19 patterns of behaviour <sup>(33)</sup>. In order to overcome the potential 'normalisation of substandard  
20 prescribing practices', the discrepancy between participants' assumptions and reality needs to be  
21 addressed. This is important in relation to AMR as participants do not link the public health problem  
22 with their LTCF patients, and in relation to antibiotic prescribing which many assume to be  
23 satisfactory in their LTCF without any supporting evidence.  
24  
25  
26  
27

28 Broom *et al.* have examined antibiotic prescribing decisions in Australian hospital doctors by using  
29 Bourdieu's theory of practice to try to understand the disjunction between AMR and sub-optimal  
30 antibiotic prescribing practices by Doctors <sup>(27)</sup>. They found that Doctors feel a sense of benevolence  
31 to their individual patient which often leads to over-prescribing antibiotics, without consideration of  
32 the public consequences of AMR. This echoes findings in this study which highlights the perception  
33 that the public health problem of AMR and antibiotic prescribing in LTCF settings are not connected.  
34 It is possible to postulate that a lack of awareness of the true severity and scale of AMR in LTCFs is  
35 underpinning this disjunction. If this is the case then up to date access to local AMR patterns in  
36 concise and regular bulletins for healthcare professionals will help to inform and motivate  
37 prescribing behaviours. This information, coupled with education on recommended guidelines, will  
38 address the 'Knowledge' and 'Beliefs about Consequences' identified in the interview findings.  
39 External barriers such as lack of time to use guidelines, difficulty in following the format of  
40 guidelines, the inertia of previous practice and lack of outcome expectancy must be addressed by  
41 these persuasive education initiatives <sup>(34)</sup>. The practicalities of interventions in the LTCF setting must  
42 be considered and local issues such as the time available for education and health care professional  
43 participation in antimicrobial stewardship must be addressed. Fundamental to the success of  
44 hospital antimicrobial stewardship interventions is the introduction of a multidisciplinary team  
45 including Consultants, Pharmacists and specialist Nurses (35). This approach should be adopted in  
46 the LTCF setting, especially given the already influential role of the Nurse and the potential for  
47 expanding Pharmacists clinical roles in this area. Pharmacists already have an existing requirement  
48 to visit LTCF and review patient's medication at least on a three-monthly basis <sup>(36)</sup> <sup>(37)</sup>. The recently  
49 proposed draft update to the HIQA Standards for Residential Care Settings for Older People in  
50 Ireland includes Theme 3 'Safe Service' whereby Standard 3.4.7 recommends that antimicrobial  
51 medication is given special consideration <sup>(38)</sup>. There is potential here for Pharmacists to increase their  
52 antimicrobial stewardship activities under the umbrella of this new guidance.  
53  
54  
55  
56  
57  
58  
59  
60

1  
2  
3 A limitation of the study is social desirability which is particularly common in prescribing research  
4 when the participant gives the answer they feel the interviewer wants to hear. As the interviews  
5 progressed, however, it became evident that once the participants felt at ease and that their  
6 practices were not being judged, they spoke freely and honestly about the challenges of antibiotic  
7 prescribing in LTCFs. Their reports that antibiotics are often prescribed unnecessarily is a testament  
8 to that. The fact that the interviewer (AF) is a Pharmacist may have affected the participant dialogue  
9 if they felt that their views or knowledge of antibiotics was being tested. But this did not emerge as a  
10 significant issue as the interview data and the opinions expressed were overall very honest and  
11 open. A key strength of the study was the interview method which allowed participants to discuss  
12 openly their beliefs and views of the antibiotic prescribing process and the performance of others  
13 involved in this process. While all participants were from LTCFs in the greater Cork region, the  
14 potential limitation of this was overcome by the broad sampling strategy. The broad sample of  
15 professionals with a variety of experience, from a range of LTCF funding categories and sizes  
16 increases the likelihood that these findings are a strong representation of the true factors  
17 influencing antibiotic prescribing in Irish LTCFs.  
18  
19  
20  
21  
22  
23

### **Conclusion:**

24  
25  
26 This study provides a detailed insight into behavioural factors influencing the antibiotic prescribing  
27 process in LTCFs. The incorporation of behavioural theory, such as the TDF and BCT taxonomy, has  
28 supported the identification of key factors such as environmental context and knowledge, which are  
29 an integral to understanding antibiotic prescribing in LTCFs. The key component which requires  
30 attention in future antimicrobial stewardship interventions is motivation which will result if  
31 participants have in-depth knowledge of antibiotic prescribing practices as captured by antibiotic  
32 surveillance. The lack of formal antimicrobial stewardship in LTCFs has also been identified and is  
33 recommended as an area to address in future interventions studies. This must become a priority for  
34 researchers in this field in order to obtain successful results in antimicrobial stewardship initiatives.  
35 It is recommended that future intervention studies incorporate behavioural theory, and  
36 standardised BCT Taxonomy, to achieve detailed feedback from participants on the successes and  
37 challenges of antimicrobial stewardship.  
38  
39  
40  
41  
42  
43  
44  
45  
46  
47

### **Funding:**

48 This research was funded by the Health Research Board PHD/2007/16.

49 **Competing Interests:** None

### **Contributorship:**

50  
51  
52 AF conceived the study, conducted the interviews and the analysis and wrote the first draft of the  
53 manuscript. SB, CB and SC were involved in the analysis and interpretation of the data. All authors  
54 read and approved the final manuscript.  
55  
56  
57  
58  
59  
60

**Data sharing:**

No additional data are available.

**Acknowledgements:**

AF conceived the study, conducted the interviews and the analysis and wrote the first draft of the manuscript. SB, CB and SC were involved in the analysis and interpretation of the data. All authors read and approved the final manuscript. Our thanks to the Doctors, Nurses and Pharmacists who agreed to be interviewed for this study. The support of University College London Centre for Behaviour Change Summer School 2014 is kindly acknowledged.

For peer review only

## References:

1. Nicolle LE. Antimicrobial resistance in long-term care facilities. *Future Microbiol.* 2012;7(2):171-4. Epub 2012/02/14.
2. Royal College of Physicians in Ireland Policy Group on Healthcare-Associated Infection. Healthcare-associated Infections and Nursing Homes or extended care settings. Royal College of Physicians in Ireland.
3. European Centre for Disease Prevention and Control. Point prevalence survey of healthcare-associated infections and antimicrobial use in European long-term care facilities. April–May 2013. Stockholm.: 2014.
4. Nicolle L, Bentley D, Garibaldi R, Neuhaus E, Smith P. Antimicrobial Use in Long Term Care Facilities. *Infect Control Hosp Epidemiol.* 2000;21(8):537-45.
5. Daneman N, Gruneir A, Bronskill SE. Prolonged antibiotic treatment in long-term care: Role of the prescriber. *JAMA Internal Medicine.* 2013:1-10.
6. Teixeira Rodrigues A, Roque F, Falcao A, Figueiras A, Herdeiro MT. Understanding physician antibiotic prescribing behaviour: a systematic review of qualitative studies. *Int J Antimicrob Agents.* 2013;41(3):203-12. Epub 2012/11/07.
7. Tonkin-Crine S, Yardley L, Little P. Antibiotic prescribing for acute respiratory tract infections in primary care: a systematic review and meta-ethnography. *Journal of Antimicrobial Chemotherapy.* 2011.
8. Hughes C, Lapane K, Kerse N. Prescribing for older people in nursing homes: challenges for the future. *International journal of older people nursing.* 2011;6(1):63-70.
9. Colquhoun HL, Brehaut JC, Sales A, Ivers N, Grimshaw J, Michie S, et al. A systematic review of the use of theory in randomized controlled trials of audit and feedback. *Implementation science : IS.* 2013;8(1):66. Epub 2013/06/14.
10. Francis JJ, O'Connor D, Curran J. Theories of behaviour change synthesised into a set of theoretical groupings: introducing a thematic series on the theoretical domains framework. *Implementation science : IS.* 2012;7(1):35. Epub 2012/04/26.
11. Michie S, Atkins L, West R. *The Behaviour Change Wheel: a Guide to Designing Interventions.* Great Britain: Silverback Publishing; 2014.
12. Cane J, O'Connor D, Michie S. Validation of the theoretical domains framework for use in behaviour change and implementation research. *Implementation science : IS.* 2012;7:37. Epub 2012/04/26.
13. Duncan EM, Francis JJ, Johnston M, Davey P, Maxwell S, McKay GA, et al. Learning curves, taking instructions, and patient safety: using a theoretical domains framework in an interview study to investigate prescribing errors among trainee doctors. *Implementation science : IS.* 2012;7(1):86. Epub 2012/09/13.
14. Michie S, van Stralen MM, West R. The behaviour change wheel: a new method for characterising and designing behaviour change interventions. *Implementation science : IS.* 2011;6:42. Epub 2011/04/26.
15. Michie S, Richardson M, Johnston M, Abraham C, Francis J, Hardeman W, et al. The behavior change technique taxonomy (v1) of 93 hierarchically clustered techniques: building an international consensus for the reporting of behavior change interventions. *Ann Behav Med.* 2013;46(1):81-95. Epub 2013/03/21.
16. Schweizer AK, Hughes CM, Macauley DC, O'Neill C. Managing Urinary Tract Infections in Nursing Homes: A Qualitative Assessment. *Pharmacy World & Science.* 2005;27(3):159-65.
17. Walker S, McGeer A, Simor AE, Armstrong-Evans M, Loeb M. Why are antibiotics prescribed for asymptomatic bacteriuria in institutionalized elderly people? A qualitative study of physicians' and nurses' perceptions. *CMAJ : Canadian Medical Association journal = journal de l'Association medicale canadienne.* 2000;163(3):273-7. Epub 2000/08/22.



18. Medical Research Council. Developing and evaluating complex interventions: new guidance. Medical Research Council, 2008.
19. Richie J, Lewis J. Qualitative Research Practice A guide for Social Science Students and Researchers. London: Sage Publications; 2008.
20. Sandelowski M. Sample size in qualitative research. *Research in nursing & health*. 1995;18(2):179-83.
21. Pope C, Ziebland S, Mays N. Analysing qualitative data. *BMJ (Clinical research ed)*. 2000;320(7227):114-6.
22. QSR International Pty Ltd. NVivo Qualitative Data Analysis Software Version 10. 2012.
23. Tong. A, Sainsbury. P, Craig. J. Consolidated criteria for reporting qualitative research (COREQ): a 32-item checklist for interviews and focus groups. *Int J Qual Health Care* 2007;19(6):349-57.
24. Strategy for Antimicrobial Resistance in Ireland. Guidelines for Antimicrobial Prescribing in Primary Care in Ireland. Health Service Executive, Health Protection Surveillance Centre., 2011.
25. Health Protection Surveillance Centre. HPSC Publications. 2013 [cited 2013 9 July]; Available from: <http://www.hpsc.ie/hpsc/Publications/>.
26. Institute for Healthcare Improvement. Raising the bar with bundles: treating patients with an all-or-nothing standard.2006. Available from: [www.ihl.org/IHI/Topics/CriticalCare/IntensiveCare/Literature/RaisingtheBarwithBundles.htm](http://www.ihl.org/IHI/Topics/CriticalCare/IntensiveCare/Literature/RaisingtheBarwithBundles.htm).
27. Broom A, Broom J, Kirby E. Cultures of resistance? A Bourdieusian analysis of doctors' antibiotic prescribing. *Social science & medicine* (1982). 2014;110:81-8. Epub 2014/04/15.
28. Charani E, Castro-Sanchez E, Sevdalis N, Kyratsis Y, Drumright L, Shah N, et al. Understanding the Determinants of Antimicrobial Prescribing Within Hospitals: The Role of "Prescribing Etiquette". *Clinical infectious diseases : an official publication of the Infectious Diseases Society of America*. 2013. Epub 2013/04/11.
29. Davey P, Brown E, Charani E, Fenelon L, Gould IM, Holmes A, et al. Interventions to improve antibiotic prescribing practices for hospital inpatients. *Cochrane Database of Systematic Reviews*. 2013;4. Epub 2013/05/02.
30. Arnold SR, Straus SE. Interventions to improve antibiotic prescribing practices in ambulatory care. *Cochrane database of systematic reviews (Online)*. 2005(4):CD003539. Epub 2005/10/20.
31. Fleming A, Browne J, Byrne S. The Effect of Interventions to Reduce Potentially Inappropriate Antibiotic Prescribing in Long-Term Care Facilities: a Systematic Review of Randomised Controlled Trials. *Drugs & aging*. 2013. Epub 2013/02/28.
32. Tjia J, Gurwitz JH, Briesacher BA. Challenge of changing nursing home prescribing culture. *The American journal of geriatric pharmacotherapy*. 2012;10(1):37-46. Epub 2012/01/24.
33. Hughes CM, Lapane K, Watson MC, Davies HT. Does organisational culture influence prescribing in care homes for older people? A new direction for research. *Drugs & aging*. 2007;24(2):81-93. Epub 2007/02/23.
34. Cabana Md RCSPNR, et al. Why don't physicians follow clinical practice guidelines?: A framework for improvement. *JAMA : the journal of the American Medical Association*. 1999;282(15):1458-65.
35. SARI Hospital antimicrobial stewardship working group. Guidelines for antimicrobial stewardship in hospitals in Ireland 2009. Available from: <http://www.hpsc.ie/hpsc/A-Z/MicrobiologyAntimicrobialResistance/InfectionControlandHAI/Guidelines/File,4116,en.pdf>.
36. Health Information and Quality Authority. National Quality Standards for Residential Care Settings for Older People Ireland,. Health Information and Quality Authority,, 2008.
37. Pharmaceutical Society of Ireland. Guidance on the supply by Pharmacists in retail pharmacy business of medicines to patients in residential care settings/nursing homes. 2014.
38. Health Information and Quality Authority. Draft National Standards for Residential Care Settings for Older People in Ireland HIQA., July 2014, Report No.

1  
2  
3  
4  
5  
6  
7  
8  
9  
10  
11  
12  
13  
14  
15  
16  
17  
18  
19  
20  
21  
22  
23  
24  
25  
26  
27  
28  
29  
30  
31  
32  
33  
34  
35  
36  
37  
38  
39  
40  
41  
42  
43  
44  
45  
46  
47  
48  
49  
50  
51  
52  
53  
54  
55  
56  
57  
58  
59  
60

For peer review only

1  
2  
3  
4  
5  
6  
7  
8  
9  
10  
11  
12  
13  
14  
15  
16  
17  
18  
19  
20  
21  
22  
23  
24  
25  
26  
27  
28  
29  
30  
31  
32  
33  
34  
35  
36  
37  
38  
39  
40  
41  
42  
43  
44  
45  
46  
47  
48  
49  
50  
51  
52  
53  
54  
55  
56  
57  
58  
59  
60

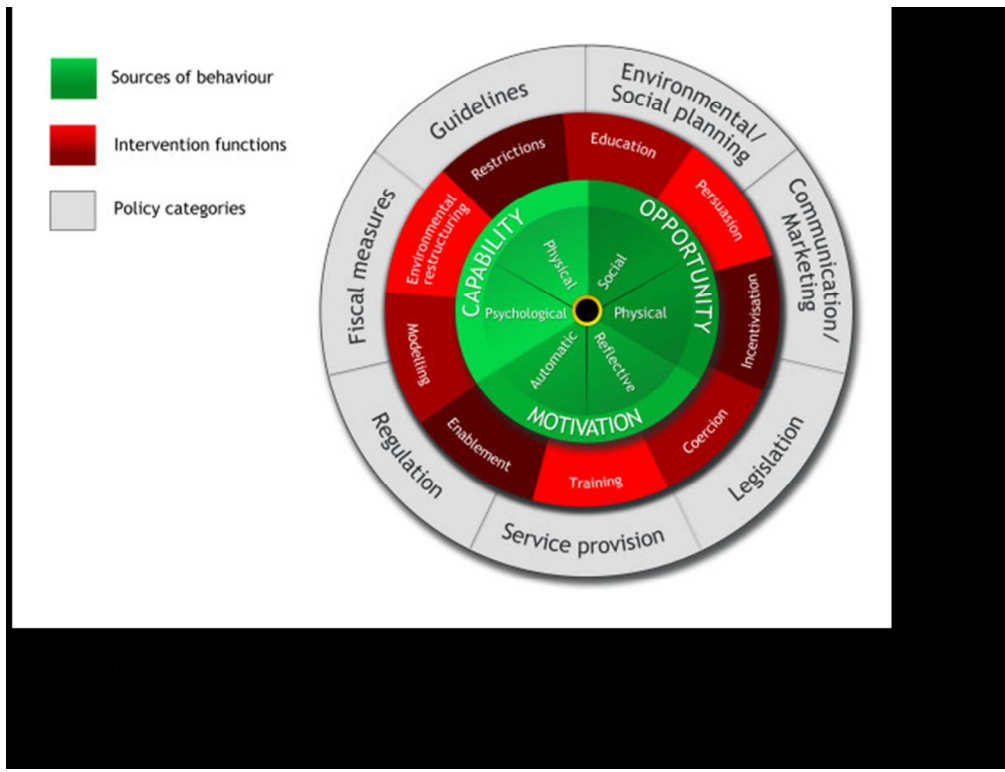

118x90mm (300 x 300 DPI)

Review only

**Supplementary material:****Table A: Consolidated criteria for reporting qualitative studies (COREQ) checklist.**

| <b>Domain 1 : Research team and reflexivity</b>         |                                                                                            |
|---------------------------------------------------------|--------------------------------------------------------------------------------------------|
| <b>Personal characteristics</b>                         |                                                                                            |
| 1. Interviewer                                          | Primary author AF.                                                                         |
| 2. Credentials                                          | PhD Scholar, Pharmacist                                                                    |
| 3. Occupation                                           | PhD Scholar, Pharmacist                                                                    |
| 4. Gender                                               | Female                                                                                     |
| 5. Experience & training                                | Training in qualitative research methods                                                   |
| <b>Relationship with participants</b>                   |                                                                                            |
| 6. Relationship established prior to study commencement | No                                                                                         |
| 7. Participant knowledge of the interviewer             | Yes in a minority of cases (2 GPs, 1 Pharmacist).                                          |
| 8. Interviewer characteristics                          | This was not addressed.                                                                    |
| <b>Domain 2: Study design</b>                           |                                                                                            |
| <b>Theoretical framework</b>                            |                                                                                            |
| 9. Methodological orientation & theory                  | Thematic content analysis mapped to the TDF*.                                              |
| <b>Participant selection</b>                            |                                                                                            |
| 10. Sampling                                            | Convenience sampling with maximum variation                                                |
| 11. Method of approach                                  | Telephone invitation                                                                       |
| 12. Sample size                                         | 37 in total                                                                                |
| 13. Non-participation                                   | Did not arise                                                                              |
| 14. Setting of data collection                          | LCTF, GP surgery, Consultant office, Pharmacy                                              |
| 15. Presence of non-participants                        | No                                                                                         |
| 16. Description of sample                               | Outlined in Supplementary material Table A                                                 |
| <b>Data collection</b>                                  |                                                                                            |
| 17. Interview guide                                     | Topic guide drafted, piloted and revised                                                   |
| 18. Repeat interviews                                   | No repeat interviews were conducted                                                        |
| 19. Audio/visual recording                              | Interviews were audio-recorded                                                             |
| 20. Field notes                                         | Recorded after interviews                                                                  |
| 21. Duration                                            | Reported; mean 22mins, range 10-35 mins                                                    |
| 22. Data saturation                                     | Sampling continued until data saturation                                                   |
| 23. Transcripts returned                                | Transcripts were available to participants on request                                      |
| <b>Domain 3: analysis and findings</b>                  |                                                                                            |
| <b>Data analysis</b>                                    |                                                                                            |
| 24. Number of data coders                               | Outlined in the text, four in total                                                        |
| 25. Description of coding tree                          | A coding tree was not developed, themes were mapped to the TDF.                            |
| 26. Derivation of themes                                | Themes were derived from the data by thematic content analysis and then mapped to the TDF. |
| 27. Software                                            | NVivo Qualitative Data Analysis Software version 10.                                       |
| 28. Participant checking                                | This was not conducted                                                                     |
| <b>Reporting</b>                                        |                                                                                            |
| 29. Quotations presented                                | Supporting quotations presented                                                            |
| 30. Data and findings consistent                        | Yes                                                                                        |
| 31. Clarity of major themes                             | A clear presentation of major themes is outlined                                           |
| 32. Clarity of minor themes                             | Variations in views and themes and minor themes are presented.                             |

\*TDF = Theoretical Domains Framework.

**Title:**

**Antibiotic prescribing in Long Term Care Facilities; a Qualitative, multidisciplinary investigation.**

**Keywords:**

Antimicrobial prescribing, Long-term care, Prescribing behaviour, Interviews, Theoretical Domains Framework, Behaviour Change Technique Taxonomy.

**Authors:**

Aoife Fleming, HRB PhD Scholar in Health Services Research  
School of Pharmacy  
University College Cork  
Cork  
Ireland  
[a.fleming@ucc.ie](mailto:a.fleming@ucc.ie)  
Tel: +353 21 4901690  
(Primary Author and Corresponding author)

Prof. Colin Bradley  
Department of General Practice  
University College Cork  
Cork  
Ireland

Shane Cullinan  
Pharmaceutical Care Research Group  
School of Pharmacy  
University College Cork  
Cork  
Ireland

Prof. Stephen Byrne  
School of Pharmacy  
University College Cork  
Cork  
Ireland  
(Alternate corresponding author. Email: [Stephen.byrne@ucc.ie](mailto:Stephen.byrne@ucc.ie), Tel: +35321 4901658)

**Objectives:**

To explore health care professionals views of antibiotic prescribing in Long Term Care Facilities (LTCF). To use the findings to recommend intervention strategies for antimicrobial stewardship in LTCFs.

**Design:**

Qualitative semi-structured interviews were conducted. The data were analysed by thematic content analysis. After the interviews, the emerging findings were mapped to the Theoretical Domains Framework (TDF), and the Behaviour Change Wheel and Behaviour Change Technique (BCT) Taxonomy were used to recommend future intervention strategies.

**Participants:**

Interviews were conducted with 37 health care professionals who work in LTCF (10 general practitioners, 4 consultants, 14 nurses, 9 pharmacists) between December 2012 and March 2013.

**Setting:**

Interviews were conducted in the greater Cork region.

**Results:**

The main domains from the TDF which emerged were; 'Knowledge', 'Environmental context and resources', 'Social influences', 'Beliefs about consequences', 'Memory, attention and decision making' with the findings identifying a need for 'Behavioural regulation'. Many participants believed that antibiotic prescribing was satisfactory at their LTCF, despite the lack of surveillance activities.

**Conclusion:**

This study, using the TDF and BCT Taxonomy, has found that antibiotic prescribing in LTCFs is influenced by many social and contextual factors. The challenges of the setting and patient population, the belief about consequences to the patient, the lack of implementation of guidelines and knowledge regarding antibiotic prescribing patterns are significant challenges to address. Based on the study findings and the application of the TDF and BCT Taxonomy some practical intervention functions for antimicrobial stewardship in LTCF are suggested.

## Article Summary

### Strengths and Limitations of the study:

- This study is the first to undertake qualitative interviews investigating antibiotic prescribing in LTCFs and to map the findings to the TDF, COM-B model and BCT Taxonomy in order to recommend intervention strategies.
- The study captures the views of the key health care professionals involved in antibiotic prescribing in LTCFs: general practitioners, consultants, nurses and pharmacists.
- The findings indicate that antibiotic prescribing in LTCFs is strongly influenced by the context of health care delivery in LTCFs. There is a need for 'Behavioural regulation' strategies such as antibiotic surveillance in LTCFs, and intervention functions such as setting goals, education, audit, feedback and monitoring may contribute to improved Antimicrobial stewardship in LTCFs.
- All the participants in the study were based in the same region in Ireland and may hold different views to those in other countries or regions. However, the broad sample and depth of discussion offers valuable insights into the Irish LTCF context.

### Funding:

This research was funded by the Health Research Board PHD/2007/16.

**Competing Interests:** None

## Introduction:

Antibiotic use in Long Term Care Facilities (LTCFs) contributes to the emergence of multi-drug resistant pathogens and healthcare-acquired infections<sup>(1)</sup>. The Royal College of Physicians in Ireland Policy Group on Health Care Associated Infection in Nursing Homes recommends that implementation of best practice for antibiotic stewardship in LTCFs and on-going research to guide interventions is necessary<sup>(2)</sup>. In the Irish context, the Healthcare Associated Infections in Long Term Care (HALT) point prevalence studies have reported a higher prevalence (10%) of antibiotic prescribing compared to the European average (5%) in 2010 and 2013<sup>(3)</sup>. Internationally, studies have suggested that between 25-75% of antibiotic prescriptions in LTCF are inappropriate and that antimicrobial resistance (AMR) is rising<sup>(1, 4)</sup>. Quantitative studies investigating antibiotic prescribing in LTCFs have suggested that prescribing patterns are driven by prescriber factors rather than infection prevalence or antimicrobial stewardship initiatives<sup>(5)</sup>. It is necessary to investigate the factors that influence antibiotic prescribing behaviours in LTCFs. In order to capture this information, the views of the health care professionals that are central to this process must be explored. Recent systematic reviews of qualitative studies of antibiotic prescribing behaviour have focussed mainly on the overall primary care or secondary care setting without focusing on the LTCF setting specifically<sup>(6-7)</sup>. It is necessary to evaluate LTCFs as a separate setting for antibiotic prescribing because patient care is often influenced by factors unique to this setting, such as the co-morbidities of the patient population and organisational culture<sup>(8)</sup>.

The use of theory to understand the mechanisms of action of intervention strategies to change behaviour has been shown to improve the effectiveness of interventions<sup>(9)</sup>. In recent years the Theoretical Domains Framework (TDF) has gained much attention as a potentially overarching theoretical framework to identify the areas where behavioural change interventions can focus<sup>(10)</sup>. The TDF was initially developed in response to requests from implementation researchers who recognised the need for an integrative framework to address the behaviour change factors relevant to intervention studies<sup>(11)</sup>. The TDF has been used in many different types of studies and the framework has been refined and validated<sup>(12)</sup>. It consists of fourteen domains which consist of eighty-four component constructs<sup>(12)</sup>. The framework comprehensively draws together, from thirty-three theories of behaviour, the crucial influences on behaviour<sup>(10)</sup>. [The TDF domains are presented in Table 1 with a sample construct.](#) The TDF has been used in qualitative studies to guide the development of interview topic guides and it has also been used as a coding framework in the analysis of qualitative material<sup>(10, 13)</sup>. Researchers in this area have designed a Behaviour Change Wheel which consists of Capability, Opportunity, Motivation and Behaviour components or the COM-B model as it is also known (Figure 1)<sup>(11, 14)</sup>. The corresponding Behaviour Change Technique Taxonomy (BCT Taxonomy) has been developed in order to standardise the content and reporting of intervention studies<sup>(11, 14-15)</sup>. In previous qualitative studies of antibiotic prescribing in LTCF a behavioural theory has not been used to inform the evaluation or to identify areas for antimicrobial stewardship<sup>(16-17)</sup>. In order to fully capture and understand the factors influencing antibiotic prescribing the views of all health care professionals involved in this process is required. The advantage of conducting qualitative investigations before the implementation of an intervention is that the findings can inform the content and delivery of the intervention based on health care professional views and experiences<sup>(18)</sup>.



With increasing rates of AMR and higher than average rates of antibiotic prescribing in Irish LTCFs an in-depth qualitative investigation of the views of all key health care professionals involved in this process is required. The objective of this study is to conduct a theoretically informed qualitative study of the factors influencing antibiotic prescribing in LTCFs. The findings of the study will be analysed using the TDF and BCT Taxonomy to identify key areas to target in antimicrobial stewardship interventions.

| <b>Domain</b>                                   | <b>Definition and example of a construct:</b>                                                                                                                                                                  |
|-------------------------------------------------|----------------------------------------------------------------------------------------------------------------------------------------------------------------------------------------------------------------|
| <u>Knowledge</u>                                | <u>An awareness of the existence of something e.g. procedural knowledge.</u>                                                                                                                                   |
| <u>Skills</u>                                   | <u>An ability or proficiency acquired through practice e.g. competence.</u>                                                                                                                                    |
| <u>Social/Professional Role and Identity</u>    | <u>A coherent set of behaviours and displayed personal qualities of an individual in a social or work setting e.g. professional confidence.</u>                                                                |
| <u>Beliefs about Capabilities</u>               | <u>Acceptance of the truth, reality or validity about an ability, talent or facility that a person can put to constructive use e.g. self-confidence.</u>                                                       |
| <u>Optimism</u>                                 | <u>The confidence that things will happen for the best or that desired goals will be attained e.g. optimism, pessimism.</u>                                                                                    |
| <u>Beliefs about consequences</u>               | <u>Acceptance of the truth, reality or validity about outcomes of a behaviour in a given situation e.g. outcome expectancies.</u>                                                                              |
| <u>Reinforcement</u>                            | <u>Increasing the probability of a response by arranging a dependent relationship, or contingency, between the response and a given stimulus e.g. rewards.</u>                                                 |
| <u>Intentions</u>                               | <u>A conscious decision to perform a behaviour or resolve to act in a certain way e.g. stability of intentions.</u>                                                                                            |
| <u>Goals</u>                                    | <u>Mental representations of outcomes or end states that an individual wants to achieve e.g. goal/target setting.</u>                                                                                          |
| <u>Memory, Attention and Decision Processes</u> | <u>The ability to retain information, focus selectively on aspects of the environment and choose between two or more alternatives e.g. decision making.</u>                                                    |
| <u>Environmental context and resources</u>      | <u>Any circumstances of a person's situation or environment that discourages or encourages the development of skills and abilities, independence, social competence and adaptive behaviour e.g. resources.</u> |
| <u>Social Influences</u>                        | <u>Those interpersonal processes that can cause individuals to change their thoughts, feelings or behaviours e.g. social pressure.</u>                                                                         |
| <u>Emotions</u>                                 | <u>A complex reaction pattern, involving experiential, behavioural and physiological elements, by which the individual attempts to deal with a personally significant matter or event e.g. anxiety.</u>        |
| <u>Behavioural Regulation</u>                   | <u>Anything aimed at managing or changing objectively observed or measured actions e.g. self-monitoring.</u>                                                                                                   |

**Table 1. Theoretical Domains presented with explanatory definition and sample construct. (adapted from Cane et al.<sup>(12)</sup>)**

## **Methods:**

### **Study design:**

Semi-structured interviews were conducted with Nurses, Doctors (Consultants, General Practitioners (GP)) and Pharmacists to investigate their opinions and experiences of antibiotic prescribing in LTCFs in the greater Cork area. The interview method was the most feasible given that participants were interviewed at their place of work (LTCF, GP surgeries, Consultants offices, Community pharmacies). The interview method also supports an honest and in-depth account of an individual's experience and opinions<sup>(19)</sup>.

**Sample:**

The method of sampling was convenience sampling with maximum variation in order to recruit a variety of participants. The sampling strategy aimed to recruit participants of varying years of experience, from different LTCF settings of varying bed occupancy and from varying funding categories (private, public and voluntary organisations). Participants were recruited by telephone invitation and were located within a 40 kilometre radius of Cork city. Interviews were conducted until data saturation was reached and two extra interviews per health care professional group were conducted to ensure that no new themes were emerging<sup>(20-21)</sup>.

**Topic Guide & Interviewing:**

A topic guide was developed based on a review of previous literature and discussion among the authors and is summarised in Table 24. The topic guide was made relevant to the appropriate health care professional group in terms of the question perspective but the key issues were the same across the board. The domains of the TDF were considered when designing the topic guide but the structure was not restricted by the TDF at this stage to allow for the emergence of unanticipated and unprompted issues during the interviews<sup>(19)</sup>. The topic guide was refined after being piloted by interviewing one Pharmacist and two GPs. Only one of the pilot GP transcripts is included in the final analysis. Ethical approval was obtained from the Clinical Research Committee of the Cork Teaching Hospitals.

**Table 24. Summary of the Interview topic guide.**

| Area                                          | Issues discussed                                                                                                                                                                                                                                |
|-----------------------------------------------|-------------------------------------------------------------------------------------------------------------------------------------------------------------------------------------------------------------------------------------------------|
| Demographic information                       | Years in practice, years working in LTCF.                                                                                                                                                                                                       |
| Process & decision making:                    | Procedure for diagnosing treating infection<br>Challenges in treating infection<br>Involvement with other health care professionals                                                                                                             |
| Knowledge:                                    | Use of or awareness of a guideline for antibiotic prescribing<br>Antibiotics commonly prescribed<br>Knowledge of local antimicrobial resistance patterns<br>Consequences of not prescribing antibiotics<br>Problems associated with antibiotics |
| Strategies to improve antibiotic prescribing: | Current activities, audits or prescribing feedback<br>Areas where more support is needed                                                                                                                                                        |

The one to one interviews were conducted by AF at the participant's place of work (LTCF, GP surgeries, Consultants offices, Community pharmacies), in a quiet room to maintain privacy and confidentiality, at a date and time convenient for them. The purpose of the study was outlined to participants. The interviewer (AF) presented herself as a researcher and did not engage in discussion with the participants about the study or topic guide before the interview so as not to bias their feedback. Some demographic information was collected. The interviews were [audio](#)-recorded, with participant approval and written informed consent, and the participants were encouraged to think of specific case examples to elaborate on the topics. The interviewer prompted and explored issues in more detail as appropriate<sup>(19)</sup>. The interview allowed for the emergence of unprompted

1  
2  
3  
4  
5  
6  
7 information and themes. All interviews were anonymised and transcribed by AF and preliminary  
8 familiarisation was begun during the transcription process. In this way, data analysis began at an  
9 early stage and the topic guide was constantly reviewed and new topics were introduced throughout  
10 the interview process as needed. ~~The interviews ranged from 10 minutes to 35 minutes (mean~~  
11 ~~interview length 22 minutes).~~ The interview transcript was available to the participants on request.  
12 Field notes were recorded after each interview.  
13

#### 14 15 16 **Analysis:**

17 As described above an iterative process of data collection and analysis was conducted. All transcripts  
18 were coded in QSR Internationals NVivo Qualitative Data Analysis Software version 10<sup>(22)</sup>. The initial  
19 phase of familiarisation involved several readings of the interview transcripts. The transcripts were  
20 initially coded by AF and a coding scheme was developed. Based on the initial familiarisation it was  
21 decided not to analyse the interviews in three separate health care professional groups. This  
22 decision was taken as the topic guide was similar between the groups and similar issues, from  
23 different groups, were emerging throughout all interviews. To ensure consistencies in coding three  
24 coders (AF, SC & SB) independently coded four interview transcripts. The inter-rater reliability was  
25 high and any disagreements were resolved by discussion. Participants own language was often used  
26 in the naming of codes in order to maintain a faithful representation of their opinions and  
27 experiences. The codes or specific beliefs were then attributed to the domains of the TDF. The next  
28 stage involved identifying what behaviours needed to change and in what methods could be  
29 recommended to achieve this. This was conducted by mapping the TDF domains to the Behaviour  
30 Change Wheel, specifically the Capability, Opportunity and Motivation components<sup>(11)</sup>. The  
31 appropriate BCT Taxonomy (version 1) was applied to suggest intervention functions for  
32 antimicrobial stewardship in LTCF. A completed checklist of the Consolidated criteria for Reporting  
33 qualitative research (COREQ) is presented in the Supplementary material [Table A](#)<sup>(23)</sup>.  
34  
35  
36  
37  
38  
39  
40  
41

#### 42 **Results:**

43 Thirty-seven interviews were conducted in total (14 Doctors (10 GPs, 4 Consultants), 14 Nurses and 9  
44 Pharmacists) from a range of LTCF settings. Participant detail is provided in [Table 32](#). ~~The interviews~~  
45 ~~ranged from 10 minutes to 35 minutes (mean interview length 22 minutes).~~ The key themes are  
46 presented by means of the relevant domain from the TDF. Participant quotes are represented in  
47 italics by profession (General Practitioner = GP, Consultant = C, Nurse= N and Pharmacist = P) and  
48 the corresponding number refers to their details in [Table 32](#).  
49  
50  
51  
52  
53  
54  
55

| Doctor<br>(General Practitioners)                       | Gender | Years medical<br>experience        | LTCF <del>category</del> <del>setting</del> & bed<br>occupancy       | Years of experience<br>in LTCF |
|---------------------------------------------------------|--------|------------------------------------|----------------------------------------------------------------------|--------------------------------|
| 1.                                                      | F      | 15                                 | Private (12 patients in a LTCF)                                      | 15                             |
| 2.                                                      | F      | 15                                 | Public/private, (63 bed LTCF)                                        | 8                              |
| 3.                                                      | F      | 2                                  | 1 Public, 1 Private                                                  | 2                              |
| 4.                                                      | M      | 9                                  | Private (14 patients in a LTCF)                                      | 9                              |
| 5.                                                      | F      | 10                                 | Private (15 patients in a LTCF)<br>Public (20 patients in a LTCF)    | 8                              |
| 6.                                                      | M      | 1                                  | Private (10 patients in a LTCF)                                      | 1.5                            |
| 7.                                                      | M      | ≥20+                               | Private (>100 in total)                                              | >20                            |
| 8.                                                      | M      | 19                                 | Voluntary (>100 in total)                                            | 19                             |
| 9.                                                      | M      | ≥30+                               | Mixed setting (patient number<br>varies)                             | >30                            |
| 10.                                                     | M      | 5                                  | Mixed setting (patient number<br>varies)                             | 5                              |
| Doctor<br>(Consultant)                                  | Gender | Speciality                         | LTCF <del>category</del> <del>setting</del>                          | Years of experience<br>in LTCF |
| 1.                                                      | M      | Geriatrician                       | Public, voluntary                                                    | >5                             |
| 2.                                                      | M      | Geriatrician                       | Public                                                               | >5                             |
| 3.                                                      | F      | Geriatrician                       | Public                                                               | >5                             |
| 4.                                                      | M      | Microbiologist                     | Public, private, voluntary                                           | >5                             |
| Pharmacist                                              | Gender | Years of<br>pharmacy<br>experience | LTCF <del>details</del> <del>category</del> (range bed<br>occupancy) | Years of experience<br>in LTCF |
| 1.                                                      | M      | 15                                 | Public, (48)                                                         | 5                              |
| 2.                                                      | F      | 8                                  | Public & Private (13-250)                                            | 8                              |
| 3.                                                      | F      | 30                                 | Private, (40-120)                                                    | 7                              |
| 4.                                                      | F      | 5                                  | Private, (40-120)                                                    | <1                             |
| 5.                                                      | M      | 35                                 | Private, (50-60)                                                     | 20                             |
| 6.                                                      | F      | 1                                  | Private, (25)                                                        | 1                              |
| 7.                                                      | M      | 14                                 | Private, (25)                                                        | 14                             |
| 8.                                                      | F      | 18                                 | Public (>150)                                                        | 2                              |
| 9.                                                      | M      | 15                                 | Public (38)                                                          | 5                              |
| Nurse                                                   | Gender | Years of<br>nursing<br>experience  | LTCF category                                                        | Years of experience<br>in LTCF |
| 1. Staff nurse                                          | F      | 21                                 | Private (50)                                                         | 4                              |
| 2. Staff nurse                                          | F      | 10                                 | Private (50)                                                         | 4                              |
| 3. CNM                                                  | F      | 25                                 | Public (40)                                                          | 11                             |
| 4. Staff Nurse                                          | F      | 16                                 | Public (40)                                                          | 5                              |
| 5. CNM                                                  | F      | 15                                 | Public (38)                                                          | 12                             |
| 6. Advanced Nurse<br>Practitioner & Nurse<br>Prescriber | F      | 26                                 | Public (>100)                                                        | 19                             |
| 7. CNM                                                  | F      | 41                                 | Voluntary (>100)                                                     | 6                              |
| 8. Staff Nurse                                          | F      | 30                                 | Voluntary (30)                                                       | 30                             |
| 9. Staff Nurse                                          | F      | 11                                 | Public (38)                                                          | 11                             |
| 10. CNM & Nurse<br>prescriber                           | F      | 33                                 | Public (38)                                                          | 26                             |
| 11. CNM                                                 | F      | 32                                 | Public/Private (60)                                                  | 20                             |
| 12. Staff Nurse                                         | F      | 11                                 | Public/private (60)                                                  | 3                              |
| 13. IPCN <sup>#</sup>                                   | F      | 15                                 | Public (multi-site)                                                  | 10                             |
| 14. IPCN                                                | F      | 15                                 | Public (multi-site)                                                  | 10                             |

**Table 3A. List of participants interviewed, years of experience and LTCF setting.**

F = Female, M = Male. \*CNM = Clinical Nurse Manager.

<sup>#</sup>IPCN= Infection Prevention and Control Nurse.

### **Theoretical Domains Framework:**

The analysis identified key domains of the TDF that were found to be relevant and they are described below. The other domains that were not identified (Optimism, Reinforcement, Intentions, Goals and Emotions) are not discussed as not enough references to the relevant constructs were made.

#### **Knowledge:**

It was decided to merge the domains 'Knowledge' and 'Skill' as the constructs emerging were overlapping and most findings related to the knowledge factors. The participants did not report that challenges in diagnosing and treating patients in LTCFs was due to a lack of skills or need for further training in undertaking physical tasks. Knowledge of antibiotic guidelines was variable among all participants. Many participants, from all professions, were not aware of the Guidelines for Antimicrobial Prescribing in Primary Care 2011 or of the Health Protection Surveillance Centre (HPSC) guidelines for the management of catheter and non-catheter related urinary tract infections<sup>(24-25)</sup>. In most cases participants report a passive, rather than active, disregard of guidelines. Nurses in the public setting were more aware of HPSC guidelines but reported that they are not often adhered to.

*"so we have all the antibiotic guidelines, we have the primary care guidelines for antibiotic prescribing which don't give you exact antibiotics to prescribe. Like generally we use the CUH [Cork University Hospital], MUH [Mercy University Hospital] ones do you know those antimicrobial guidelines."* (GP2)

The interpretation of urine samples from catheterised patients poses a challenge in LTCF. Asymptomatic bacteriuria is an area where Doctors and Nurses felt unsure about whether to prescribe antibiotics or not. Several Consultants identified that this is often an area of antibiotic overuse.

*"That is a big bug bear of mine, the UTI, the old person with a UTI, it drives me crazy. Every old person has a UTI and I'd say at least once a day I say to somebody 'you know if you take a room full of frail old people half of them will have dirty urine, it doesn't mean they have a UTI'."* (C2) (UTI = Urinary Tract Infection).

Many participants conveyed confidence in their clinical knowledge due to their years of experience in LTCF practice and their in-depth knowledge of the individual patients.

*"So it can be very difficult to know, you are going by a bit of guesswork, a bit of analysis of results, a bit of examination, a bit of the history from the nurse, it depends on how well the nurse knows them as well, how changed they are from their usual baseline. Then you make a decision. You probably have a lower threshold for using antibiotics in long term care facilities because of all of those factors."* (GP9)

In terms of clinical knowledge of the different antibiotics and their indications it was evident that this varies between participants. Detailed knowledge of antibiotic microbiological coverage or recommended infection indication was not displayed or reported in the findings. Participants were

1  
2  
3  
4  
5  
6  
7  
8  
9  
10  
11  
12  
13  
14  
15  
16  
17  
18  
19  
20  
21  
22  
23  
24  
25  
26  
27  
28  
29  
30  
31  
32  
33  
34  
35  
36  
37  
38  
39  
40  
41  
42  
43  
44  
45  
46  
47  
48  
49  
50  
51  
52  
53  
54  
55  
56  
57  
58  
59  
60

more likely to refer to *'strong antibiotics'* and only rare references to *'first line antibiotics'* were made. All participants are aware that AMR is a growing public health problem and that overuse of antibiotics is a contributory factor but few had any insight into local AMR data or referred to AMR as a serious problem in their LTCF.

*"... we only have a problem with resistance when it comes to urine infections because that is where I think we are over-treating."* (GP4).

Closely aligned to 'Knowledge' findings are the themes from the **'Belief of capabilities'** domain. Nurses expressed confidence in providing a high quality of care for the patients and that the more qualified Nurses, Nurse Prescribers and Clinical Nurse Managers provide a valuable to support to all nurses.

*"...she is very good (nurse manager) and very with it and she links up with the doctors quite a bit. If she has an issue they really listen to her as well."* (N4)

Doctors also expressed professional confidence in caring for LTCF patients with infection. Guidelines are seen as a useful reference but deviations from the guidelines were justified by relying on their own, or on Nurses, clinical judgement and expertise.

*"nothing in medicine is black and white so you can't have guidelines, guidelines are just that, they are guidelines not protocols. I mean that is the difference people need to understand, protocols are something you have to stick to"* (GP4)

*"I have no issue with guidelines you know. I think the most important thing is that when veering away from guidelines is justifying what we are doing."* (GP7)

*"You don't want them (nurses) to see somebody in the bed who they are worried about and say oh she's not ticking such a box so I'm not going to ask the doctor to see her"* (GP1)

The Pharmacists interviewed expressed confidence in the medicines management service they provide to the LTCF but are less empowered in terms of expanding their clinical role. The reasons for this are the lack of time and the need for further training and guidelines in this area.

*"I think if they had more structured antibiotic CPD for antibiotics in nursing homes and even for pharmacies if we had more specific stuff it would be a big help."* (P4). (CPD= Continuing Professional Development).

*"I would be fairly confident but sure I have all the resources here so I can have a quick look and go through them, I wouldn't know all of it off the top of my head, some of it I would."* (P9).

*"I would like to be involved in some sort of you know developing some sort of protocol or guidelines within the nursing home, provided we are given the resources and the time to do that with a multidisciplinary team..."* (P2).

#### **Social/professional role and identity:**

The responsibility for antibiotic prescribing was clearly assigned to the Doctor but interestingly the key role of the Nurse in that process was also conveyed by all professions.

1  
2  
3  
4  
5  
6  
7  
8  
9  
10  
11  
12  
13  
14  
15  
16  
17  
18  
19  
20  
21  
22  
23  
24  
25  
26  
27  
28  
29  
30  
31  
32  
33  
34  
35  
36  
37  
38  
39  
40  
41  
42  
43  
44  
45  
46  
47  
48  
49  
50  
51  
52  
53  
54  
55  
56  
57  
58  
59  
60

*"I would be the one dealing with the GPs all the time on their rounds...so even though I think so and so might need an antibiotic or whatever, it is the doctors call in the end."* (N3)

*"the way we operate is it is a nursing led facility and we come in to support that nursing lead. We are very lucky with the level of clinical nurse specialists that are there. So they have that higher training in dealing with elderly people, so they provide the care effectively and they rope us in then if there are issues that they are unhappy with or if there are issues as regards to prescribing. So we get involved if they have a concern about a patient or regarding a possibility or probability of infection."* (GP7)

It was reported that between Doctors, antibiotic prescribing practices vary in terms of the volume of and choice of antibiotics prescribed. It was reported several times that out-of-hours Doctors are often more likely to prescribe antibiotics. The main reason to explain this is that the patient is generally sicker if a Doctor has to visit out of hours and an antibiotic is prescribed to avoid hospitalisation or a revisit.

*"you know if they are calling SouthDoc the patient has a fever, clinical signs, a bad cough, you are probably more likely to prescribe than not."* (GP9)  
(SouthDoc is the out-of-hours doctors service in the greater Cork region.)

The difficulties, as reported by an out-of-hours Doctor, are that they do not know the patient's medical history, they have limited diagnostic equipment, the patient is often very ill and they may be under pressure from the patient's family or Nurse to prescribe. Some GPs reported that out-of-hours Doctors may not prescribe first line antibiotics.

*"...you are called as an out of hours doctor you often times have little option but to prescribe an antibiotic because you don't know the patient, you don't know the staff, you often don't know the background and you may not have complete notes in the history"* (GP5)

The role of the Pharmacist in antimicrobial stewardship has not developed considerably in LTCFs based on the reports of those interviewed. Some reported that they already attend clinical multidisciplinary meetings with the GPs and Nurses and would welcome the opportunity to engage in this further, with support and appropriate training to improve knowledge. Others referred to the lack of time to engage in antimicrobial stewardship and that the priorities for Pharmacists in LTCFs were other medicines management issues.

*"In terms of antibiotics I don't know necessarily if there is a huge role there, there are roles in other medicines management issues but not particularly antibiotics."* (P9)

#### **Social influences:**

The social context within which antibiotics are prescribed in LTCFs is clearly evident in the findings. The influence of Nurses on Doctors decisions when managing patients with infection, especially when the decision to prescribe an antibiotic or not is made, was referred to frequently and by all

1  
2  
3  
4  
5  
6  
7 groups of professionals. The Nurses act in a gatekeeper role by communicating patient care issues  
8 and organising clinical assessments by the Doctor when they visit the LTCF. In some cases their  
9 influence in the decision making process of whether to prescribe an antibiotic can be felt as a  
10 pressure by doctors.

11  
12 *"...they certainly guide us in our prescribing, they are probably, I don't know is this a fair or unfair*  
13 *thing to say but they are probably happier when we prescribe because at least they know something*  
14 *has been treated "* (GP2)

15  
16 *"You sometimes feel that you do come under pressure to prescribe, and you have to sort of avoid that*  
17 *you know."* (GP8)

18  
19 *"Sometimes the doctors are guided by what we would suggest and what we feel or think. I suppose*  
20 *they just kind of, they are of the opinion we are with the patient so much more than they are but*  
21 *some doctors, definitely not all of them, some of them would defer to the nurse a little bit."* (N9)

22  
23 On the other hand, some Nurses also discussed their influence on Doctors in terms of delaying  
24 antibiotic prescriptions by suggesting 'watchful waiting' or that the Doctor would reassess the  
25 patient in a few days and reconsider the need for an antibiotic at that point.

26  
27 The role of the Pharmacist is mainly in screening for drug interactions and providing medicines  
28 information, rather than influencing the antibiotic prescribing process. The influence of residents'  
29 family on Doctors and Nurses to assess their relative occurs but was not linked to a pressure to  
30 prescribe an antibiotic. Families tend to be satisfied once the Doctor has made a clinical assessment,  
31 even if they don't prescribe an antibiotic. The importance of including the families in the decision  
32 making process and establishing goals of care for patients was underlined by many Doctors, and  
33 interestingly by all the Consultant Geriatricians.

34  
35 *"...the family would be insistent on them being seen by a doctor most of time and influence the nurse*  
36 *to call you but once you come and see them and assess them, no it would be uncommon that they*  
37 *would insist on an antibiotic."* (GP9)

38  
39 *"My feeling about prophylactic antibiotics for UTIs and stuff is I ask the family and the patient ' do*  
40 *you feel it is helping or making a difference' and if it isn't I stop it. "* (C2)

#### 41 **Environmental context & resources:**

42  
43 | The key contextual issue raised is that the management of infection in LTCFs is complicated by a high  
44 level of co-morbidity, cognitive impairment and dementia in these patients. The lack of diagnostic  
45 equipment and interpretation of microbiology results is a significant challenge for Doctors and  
46 Nurses. They also reported that these elderly patients do not always have a high temperature on  
47 infection and are often not able to communicate their symptoms. This links to 'Social Influences' as  
48 Doctors depend greatly on Nurses support to detect patients signs of infection. The restricted access  
49 | to a Doctor was also a challenge to this process as many LTCFs do not have an on-site Medical  
50 Officer but receive care from GPs who visit infrequently or only on request. Often, due to time  
51 constraints, this can lead to antibiotic prescribing 'over the phone' which one GP referred to as  
52 prescribing for "doctor reasons rather than patient reasons or bacteriological reasons" (GP6). These  
53 challenges are all explicitly linked to an increase in antibiotic prescribing by many participants.  
54



1  
2  
3  
4  
5  
6  
7 *"I think most of them end up getting an antibiotic to treat as a caution even though maybe it is not*  
8 *as indicated as it would be in the community" (GP2)*

9  
10 *"You sometimes feel that you are prescribing in those situations without a very definite bug or*  
11 *infection." (GP6)*

12  
13 *"Occasionally if it is symptomatic UTI you may prescribe over the phone and see how they go. If it is*  
14 *not responding then you obviously need to go see them." (GP5)*

15  
16 Due to the plethora of clinical issues for discussion at the clinical multidisciplinary teams meetings  
17 antimicrobial stewardship was not reported as a key item on the agenda. There are numerous other  
18 competing demands on time during the Doctors visit to the LTCF and during the clinical meetings.  
19 Participants reported that the regulation of LTCFs by the Health Information and Quality Authority  
20 (HIQA) ensures that medication management procedures and Pharmacist medication reviews are  
21 implemented. It was implied that antibiotic audits are only ever conducted to fulfil quality  
22 improvement requirements rather than to influence clinical practice. The organisational culture  
23 within LTCFs, however, impedes many extra clinical and quality improvement activities because  
24 time, and perhaps motivation, is not available.  
25

26 *"at the moment there is a linked up thinking between the nursing home and the pharmacy... the*  
27 *triangle isn't complete yet where the GP is involved...there are some GPs who would be into going*  
28 *clinical meetings and having clinical meetings, others wouldn't be". (P7)*

29  
30 *"since HIQA have leant on them a small bit it is far more detailed, there is a far more joined up*  
31 *thinking between pharmacy and the home and we have established a set of I suppose a complete*  
32 *medicine management system" (P7)*

33  
34 *"Then I suppose all it needs is someone like HIQA or the ICGP or the pharmacy crowd to come and*  
35 *say 'look lads you are not practicing properly unless you are doing this' then GPs do adhere to it, they*  
36 *will certainly adhere to it if they are told it is best practice and they all try to adhere to best practice."*  
37 (GP2) (ICGP: Irish College of General Practitioners).  
38

39 The domains 'Environmental context and resources' and '**Beliefs about Consequences**' are closely  
40 aligned. The potential harm or hospitalisation of a vulnerable, co-morbid LTCF patient if an antibiotic  
41 is not prescribed is a concern to Doctors and Nurses. The general consensus was that over-  
42 treatment with antibiotics and subsequent care in the LTCF is preferred and that hospitalisation  
43 should be avoided if at all possible. The domain 'Emotion' is relevant here as participants spoke  
44 about fear of the patient coming to harm because of their decision.  
45

46 *"...if that means you prescribe the odd antibiotic excessively, I think for the resident most times it's a*  
47 *better scenario for the individual than ending up in an A&E department because of an untreated*  
48 *infection. It's a balancing act really." (GP1)*

49  
50 *"...you say look we will hold off on the antibiotic and I have certainly been caught once with a*  
51 *patient who then developed pyelonephritis and was sick and so that learns you alright." (GP7).*

52  
53 There is a lack of acknowledgement that antibiotic prescribing in LTCFs contributes to the public  
54 health problem of AMR. May references to AMR associated it with antibiotic prophylaxis and that it  
55

56 Page 13 of 23  
57  
58  
59  
60

1  
2  
3  
4  
5  
6  
7 was not common among the patients in the LTCF. There was little discussion about how to avoid the  
8 development of AMR and a sense of inevitability regarding this unavoidable problem was evident.

9  
10 *"..writing a prescription for an antibiotic is seen as an action or a response, a quick action or a quick  
11 response to some problem... I would doubt that resistance is at the forefront of that decision at that  
12 time."* (C3)

### 13 **Memory, attention and decision processes:**

14 The variability and complexity of the decision making process is evident by the findings attributed to  
15 the aforementioned TDF domains. For many Doctors this decision making process is a culmination of  
16 the factors already outlined resulting in a 'balancing act' as they make a risk-benefit assessment of  
17 the patients need for an antibiotic. The fear of the consequences for the patient and the uncertainty  
18 around the diagnosis of infection in LTCF patients was clearly linked to the overprescribing of  
19 antibiotics in LTCFs by many participants. Much discussion centred on the decision of whether to  
20 prescribe an antibiotic or not, with much less thought given to the decision around which antibiotic  
21 to prescribe.  
22

23  
24 *"I think if you wait and if the person gets sicker you are kind of damned and if you give them an  
25 antibiotic and they really did not have an infection and something else happens to them you are  
26 damned."* (C1)

27  
28 *"you probably do end up prescribing more for the elderly than you would for you or me who are  
29 younger, in the fact that you are always slightly worried that if you don't prescribe then they will get  
30 worse."* (GP8)

31  
32 The decision making autonomy and individual patient care approach dominates the decision making  
33 process for Doctors and Nurses. Their attention is focussed on the patient's clinical presentation,  
34 medical history and in some cases the overall care plan. As outlined in 'Beliefs about consequences',  
35 the public health threat of AMR does not influence this decision.  
36

37  
38 *"I would look to see do they have a temperature, not all the elderly will develop a temperature, some  
39 of them are immuno-compromised for various reasons so they don't always necessarily have a  
40 temperature. So looking at sats, looking at clinical findings, looking at have they gone off food, are  
41 they obviously unwell in themselves. I think that is one thing that sometimes guidelines don't  
42 capture. They don't capture that sort of, they will have criteria set down but they don't cover that  
43 sort of knowing the patient bit."* (GP1)

44  
45 Several participants acknowledged the valuable support of guidelines to help clinical decision  
46 making. Nurses and Pharmacists reported that guidelines are an effective way to ensure that all  
47 health care professionals were practicing evidence based medicine and that they are a necessity  
48 when dealing with outbreaks of infection.

49  
50 *"I think there needs to be clear guidelines and protocols in each setting regarding antibiotic use. I do  
51 tend to think that there is just generic broad spectrum prescribing of different types of infections  
52 without actually doing any sensitivity testing."* (P2)

53 This leads to the important domain of 'Behavioural regulation'. The extent of self-monitoring by  
54 means of antibiotic surveillance or audit is low and any reported activities generally consisted of

1  
2  
3  
4  
5  
6  
7 participation in the HALT point prevalence studies in some, but not all, of the LTCFs. Participants  
8 from all groups welcomed the idea of surveillance and reviewing antibiotic prescribing practices and  
9 felt that this would contribute to improving patient care. Doctors were somewhat cautious and  
10 several expressed doubt about conducting audits which judge an antibiotic prescription as being  
11 appropriate or not. Benchmarking audit results with other centres was not viewed as being a  
12 particularly useful exercise by many Doctors.

13  
14 *“Comparing to other centres, yes but so what? What you are going to do is compare your errors*  
15 *really to their errors. What you need to do is to compare to what you should be doing and see if that*  
16 *can be implemented, if you can do that.” (GP6)*

17  
18 A few participants made suggestions for information technology solutions such as decision support  
19 systems to guide decision making but that a lack of resources would rule out that option.

20  
21 *“So I suppose the first thing is the guidance is there, the second thing then is education around the*  
22 *guidance and then you have got to audit it. So it is a cycle, you know the cycle, but whether the*  
23 *government is willing to actually you know follow through with that, that is the big problem, with*  
24 *that is that some investment needs to be made in the education and then people can use it as an*  
25 *audit for their continuing medical education and their medical counsel requirements.” (GP1)*

#### 26 27 28 **Application of BCT Taxonomy and identification of potential Intervention functions:**

29  
30 The BCT Taxonomy (version 1) has been developed in order to improve the design and  
31 implementation of interventions<sup>(14)</sup>. In the COM-B model Capability, Motivation and Opportunity  
32 interact to generate Behaviour<sup>(11)</sup>. Capability represents an individual’s physical and psychological  
33 ability to undertake an activity. Opportunity represents all the factors outside the individual, social  
34 and physical, that prompt behaviour or make it possible. Motivation involves the brain processes,  
35 automatic and reflective, that direct behaviour. The principles of the COM-B model have been  
36 applied to the findings of this study to recommend strategies for antimicrobial stewardship in LTCF  
37 as outlined in Table 43. The detailed taxonomy has been applied in order to guide the  
38 standardisation of intervention content design and reporting<sup>(11)</sup>. The key strategies are; Setting  
39 Goals, Education, Audit, Feedback and Monitoring. These strategies have been selected based on  
40 the APEASE criteria (Affordable, Practical, Effective/cost-effective, Acceptable, Safe and  
41 Equitable)<sup>(11)</sup>. Many of the intervention functions were suggested by or discussed with the study  
42 participants, thereby improving the likelihood of acceptability in the future. If monitoring and  
43 feedback of antibiotic prescribing was introduced, it is possible that comparing or bench-marking the  
44 results to other LTCF would motivate health care professionals to reflect on and change their  
45 prescribing patterns. The TDF domains Goals and Intentions, which were not represented in the  
46 study findings, have been included because clear targets for antimicrobial stewardship are required  
47 to motivate behaviour change. Financial Incentivisation is suggested but is not likely to be a realistic  
48 option as a change to Irish health care policy would be required.

**Table 43.** Suggested Intervention strategies identified by applying the TDF and BCT Taxonomy (version 1) to the study findings<sup>(11)</sup>.

| TDF domain*                                                                                                                                                                                                                                                | COM-B*<br>Component**                | BCT Taxonomy                                                           | BCT Label                                                                                                                                                               | Strategy examples (with Intervention function underlined)                                                                                                                                                                                                                               |
|------------------------------------------------------------------------------------------------------------------------------------------------------------------------------------------------------------------------------------------------------------|--------------------------------------|------------------------------------------------------------------------|-------------------------------------------------------------------------------------------------------------------------------------------------------------------------|-----------------------------------------------------------------------------------------------------------------------------------------------------------------------------------------------------------------------------------------------------------------------------------------|
| <u>Behavioural Regulation</u> ,<br><u>Goals</u> , <u>Intentions</u> ,<br><u>Social/Professional Identity</u> .                                                                                                                                             | C-(Psych.)<br>M-(Refl.)              | <b>Goals &amp; Planning</b>                                            | Goal Setting (Outcome).<br>Action Planning.<br>Review outcome goals.                                                                                                    | <b>Enablement:</b> Set targets for antibiotic usage.<br>Use Antibiotic 'Care Bundles'***                                                                                                                                                                                                |
| <u>Knowledge</u> , <u>Memory</u> , <u>Attention &amp; Decision making processes</u> ,<br><u>Behavioural Regulation</u> ,<br><u>Beliefs about Capabilities</u> ,<br><u>Optimism</u> .                                                                       | C-(Psych.)<br>C-(Phys.)<br>M-(Refl.) | <b>Shaping knowledge, Natural consequences, Comparison of outcomes</b> | Instruction on how to perform behaviour.<br>Information about health consequences.<br>Credible source.                                                                  | <b>Education:</b> information about antibiotics, guidelines & AMR.<br><b>Persuasion:</b> Present information to emphasise importance of not prescribing antibiotics inappropriately. Persuasive communication of information, supported by Consultant Microbiologists & Geriatricians.  |
| <u>Environmental context &amp; resources</u> ,<br><u>Memory</u> , <u>Attention &amp; Decision making processes</u> .                                                                                                                                       | O-(Phys.)<br>C-(Psych.)<br>C-(Phys.) | <b>Antecedents, Associations</b>                                       | Restructuring the physical environment.<br>Prompts/cues.<br>Adding objects to the environment.                                                                          | <b>Environmental restructure/enablement:</b><br>Reduce/remove LTCF stock of non-first line antibiotics (Restriction).<br>Provide copies of the guidelines & supporting evidence.<br>Use antibiotic 'Care Bundles'.                                                                      |
| <u>Knowledge</u> , <u>Memory</u> , <u>Attention &amp; Decision making processes</u> ,<br><u>Behavioural Regulation</u> ,<br><u>Social Influences</u> .                                                                                                     | C-(Phys.)<br>C-(Psych.)<br>M-(Auto.) | <b>Repetition &amp; substitution</b>                                   | Behavioural practice/rehearsal                                                                                                                                          | <b>Training:</b> Practice referring to the Guidelines in daily practice                                                                                                                                                                                                                 |
|                                                                                                                                                                                                                                                            | O-(Soc.)                             | <b>Social support</b>                                                  | Social support (practical).                                                                                                                                             | <b>Persuasion &amp; Enablement:</b> Encourage Doctors, Nurses & Pharmacists to promote guideline & 'Care Bundle' implementation                                                                                                                                                         |
| <u>Goals</u> , <u>Beliefs about Consequences</u> , & <u>Capabilities</u> ,<br><u>Behavioural Regulation</u> ,<br><u>Memory</u> , <u>Attention &amp; Decision making Processes</u> ,<br><u>Social/Professional Identity</u> ,<br><u>Social Influences</u> . | M-(Refl.)<br>C-(Psych.)<br>O-(Soc.)  | <b>Feedback &amp; Monitoring, Comparison of outcomes, Identity.</b>    | Feedback on outcome of behaviour<br>Discrepancy between current behaviour & goal.<br>Incompatible beliefs.<br>Information about others' approval.<br>Social comparison. | <b>Persuasion:</b> Audit & feedback of antibiotic prescribing & 'Care Bundles'.<br><b>Enablement:</b> Outline deviations from guidelines/evidence based practice.<br><b>Persuasion:</b> Bench-mark antibiotic usage against other LTCF.<br>Consultant review of antibiotic prescribing. |
| <u>Reinforcement</u> , <u>Knowledge</u> ,<br><u>Beliefs about Capabilities</u> ,<br><u>Social/Professional Identity</u> ,<br><u>Optimism</u> .                                                                                                             | C-(Psych.)<br>M-(Refl.)              | <b>Reward &amp; threat, Scheduled consequences.</b>                    | Knowledge.<br>Incentive (outcome).<br>Reward approximation/completion.                                                                                                  | <b>Incentivisation:</b><br>Positive reinforcement from Consultants of audit results.<br>Financial incentive will be provided if antibiotic prescribing targets met/'care bundles' implemented.                                                                                          |

\*TDF domains: BR = Behavioural Regulation, G = Goals, I = Intentions, S/P Id = Social & Professional identity, K = Knowledge, MAD = Memory, Attention & Decision making processes, B Cap = Beliefs about Capabilities, O = Optimism, En = Environmental context & resources, B Con = Beliefs about consequences, SI = Social Influences, R = Reinforcement.

\*\*COM-B components: C-(Psych) = Psychological Capability, C-(Phys) = Physical Capability, O-(Soc) = Social opportunity, O-(Phys) = Physical Opportunity, M-(Refl) = Reflective Motivation, M-(Auto) = Automatic Motivation.

1  
2  
3  
4  
5  
6  
7  
8  
9  
10  
11  
12  
13  
14  
15  
16  
17  
18  
19  
20  
21  
22  
23  
24  
25  
26  
27  
28  
29  
30  
31  
32  
33  
34  
35  
36  
37  
38  
39  
40  
41  
42  
43  
44  
45  
46  
47  
48  
49

\*\*\*Care bundle: A care bundle is a collection of processes needed to effectively and safely care for patients undergoing particular treatments with inherent risks. Several interventions are 'bundled together' and, when combined, significantly improve patient outcomes<sup>(26)</sup>.

For peer review only

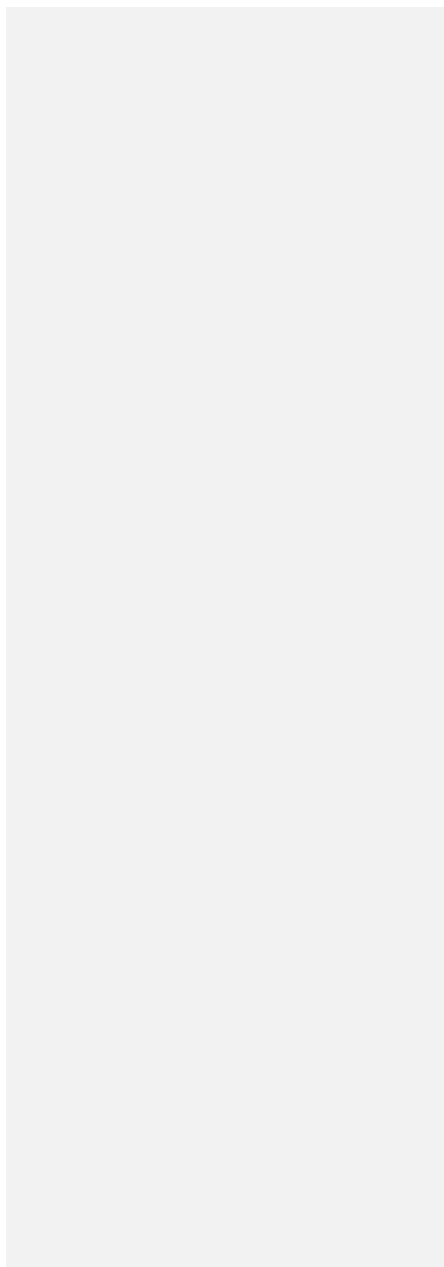

## Discussion:

This is one of the first studies to investigate the views of health care professionals in LTCFs about antibiotic prescribing and to use a behavioural change theory to analyse the findings and suggest intervention strategies for antimicrobial stewardship. The findings have provided valuable information to understand the LTCF antibiotic prescribing culture in great detail. The challenges relating to antimicrobial prescribing in LTCFs were identified along with many broad issues at play such as the organisational culture of LTCFs and health care delivery in LTCFs. This study has found that the antibiotic prescribing process is complicated in LTCFs and influenced by social, cultural and contextual issues. The TDF has proven to be a very useful tool for the analysis of the interview findings in order to encompass the factors influencing the prescribing of antibiotics. Previous qualitative studies of antibiotic prescribing in LTCFs identified the challenges of diagnosing infection in LTCF, the social pressures from family and nurses, and the variation in practice between different health care professionals, without investigating the findings from a theoretical perspective<sup>(16-17)</sup>. This study contributes to the knowledge base by providing more evidence to support the importance of behavioural regulation as a strategy for antimicrobial stewardship. The application of the findings to the COM-B model and the BCT Taxonomy has provided suggestions for appropriate intervention functions on which to model future antimicrobial stewardship interventions. The results indicate that several intervention functions such as education around guidelines, audit and feedback to measure performance, and guidance and persuasion by experts in the field, would target the domains identified by the TDF. When the main findings are distilled, the 'behavioural diagnosis' of the relevant COM-B components finds that a key driver for change and antimicrobial stewardship in LTCFs is Motivation. It is evident from the findings that antibiotic prescribing in LTCFs is influenced by social and environmental challenges rather than by antimicrobial stewardship results and strategies. In order to raise antimicrobial stewardship as a priority item for patient care and quality improvement all Doctors, Nurses and Pharmacists involved in LTCFs need to be motivated to reflect on current practice by undertaking antibiotic surveillance in the LTCFs.

An important finding of this study is that sub-optimal or inappropriate antibiotic prescribing is not something the LTCF participants believed was happening in their LTCF. In similar studies with hospital doctors, sub-optimal antibiotic prescribing has been admitted openly and is almost accepted as an inevitable outcome of patient care<sup>(27)</sup>. In the hospital setting sub-optimal antibiotic prescribing was accounted for by Doctors' benevolence, unwillingness to challenge the hospital medical hierarchy and a coping mechanism for time pressures<sup>(27-28)</sup>. This study found that most LTCF health care professionals reported satisfactory practices but were not able to support these beliefs with facts as no surveillance activities were in place. This reinforces the need for on-going behavioural regulation measures in LTCFs, as is conducted in most hospital settings. Antibiotic stewardship strategies are commonly classified as persuasive (education, audit and feedback) or restrictive (restricted formulary, prior authorisation) or structural (e.g. computer decision support systems)<sup>(29)</sup>. A systematic review of interventions to improve antibiotic prescribing in hospitals recommends that both groups of techniques improve patient outcomes and reduce AMR, but that restrictive techniques should only be used when urgent<sup>(29)</sup>. In ambulatory care, multi-faceted interventions involving educational techniques work best when local barriers to change are addressed<sup>(30)</sup>. A systematic review of trials to improve antibiotic prescribing in LTCFs found that

educational sessions and material, involving local consensus with staff, are generally acceptable but the results of most studies were modest and not sustained<sup>(31)</sup>. This suggests a greater need to investigate the behavioural reasons to explain these trial results and the use of intervention functions which sustain motivation for change.

The challenge of designing and delivering antimicrobial stewardship interventions in LTCFs may be compounded by the unique organisational culture present which is different to the hospital and primary setting. It has been well acknowledged that LTCFs have a wide variety of organisational models and service delivery structures e.g. Nurse to resident ratio, access to Doctor, access to diagnostic equipment or microbiology results<sup>(32)</sup>. The influential role of nurses, the variability in practices between LTCFs, the ethical considerations of caring for patients with dementia and at the end of their life, are all characteristic features of LTCF services that must be considered when planning quality improvement strategies<sup>(8)</sup>. The Schein model of organisational culture, as previously discussed by Hughes *et al.*, suggests that in order to truly understand an organisation a deeper knowledge of the underlying assumptions needs to be analysed, and not just the observable patterns of behaviour<sup>(33)</sup>. In order to overcome the potential 'normalisation of substandard prescribing practices', the discrepancy between participants' assumptions and reality needs to be addressed. This is important in relation to AMR as participants do not link the public health problem with their LTCF patients, and in relation to antibiotic prescribing which many assume to be satisfactory in their LTCF without any supporting evidence.

Broom *et al.* have examined antibiotic prescribing decisions in Australian hospital doctors by using Bourdieu's theory of practice to try to understand the disjunction between AMR and sub-optimal antibiotic prescribing practices by Doctors<sup>(27)</sup>. They found that Doctors feel a sense of benevolence to their individual patient which often leads to over-prescribing antibiotics, without consideration of the public consequences of AMR. This echoes findings in this study which highlights the perception that the public health problem of AMR and antibiotic prescribing in LTCF settings are not connected.

It is possible to postulate that a lack of awareness of the true severity and scale of AMR in LTCFs is underpinning this disjunction. If this is the case then up to date access to local AMR patterns in concise and regular bulletins for healthcare professionals will help to inform and motivate prescribing behaviours. This information, coupled with education on recommended guidelines, will address the 'Knowledge' and 'Beliefs about Consequences' identified in the interview findings. External barriers such as lack of time to use guidelines, difficulty in following the format of guidelines, the inertia of previous practice and lack of outcome expectancy must be addressed by these persuasive education initiatives<sup>(34)</sup>. The practicalities of interventions in the LTCF setting must be considered and local issues such as the time available for education and health care professional participation in antimicrobial stewardship must be addressed. Fundamental to the success of hospital antimicrobial stewardship interventions is the introduction of a multidisciplinary team including Consultants, Pharmacists and specialist Nurses (35). This approach should be adopted in the LTCF setting, especially given the already influential role of the Nurse and the potential for expanding Pharmacists clinical roles in this area. Pharmacists already have an existing requirement to visit LTCF and review patient's medication at least on a three-monthly basis<sup>(36) (37)</sup>. The recently proposed draft update to the HIQA Standards for Residential Care Settings for Older People in Ireland includes Theme 3 'Safe Service' whereby Standard 3.4.7 recommends that antimicrobial medication is given special consideration<sup>(38)</sup>. There is potential here for Pharmacists to increase their antimicrobial stewardship activities under the umbrella of this new guidance.

Page 19 of 23

1  
2  
3  
4  
5  
6  
7 A limitation of the study is social desirability which is particularly common in prescribing research  
8 when the participant gives the answer they feel the interviewer wants to hear. As the interviews  
9 progressed, however, it became evident that once the participants felt at ease and that their  
10 practices were not being judged, they spoke freely and honestly about the challenges of antibiotic  
11 prescribing in LTCFs. Their reports that antibiotics are often prescribed unnecessarily is a testament  
12 to that. The fact that the interviewer (AF) is a Pharmacist may have affected the participant dialogue  
13 if they felt that their views or knowledge of antibiotics was being tested. But this did not emerge as a  
14 significant issue as the interview data and the opinions expressed were overall very honest and  
15 open. A key strength of the study was the interview method which allowed participants to discuss  
16 openly their beliefs and views of the antibiotic prescribing process and the performance of others  
17 involved in this process. While all participants were from LTCFs in the greater Cork region, the  
18 potential limitation of this was overcome by the broad sampling strategy. The broad sample of  
19 professionals with a variety of experience, from a range of LTCF funding categories and sizes  
20 increases the likelihood that these findings are a strong representation of the true factors  
21 influencing antibiotic prescribing in Irish LTCFs.  
22

### 23 24 25 **Conclusion:** 26

27 This study provides a detailed insight into behavioural factors influencing the antibiotic prescribing  
28 process in LTCFs. The incorporation of behavioural theory, such as the TDF and BCT taxonomy, has  
29 supported the identification of key factors such as environmental context and knowledge, which are  
30 an integral to understanding antibiotic prescribing in LTCFs. The key component which requires  
31 attention in future antimicrobial stewardship interventions is motivation which will result if  
32 participants have in-depth knowledge of antibiotic prescribing practices as captured by antibiotic  
33 surveillance. The lack of formal antimicrobial stewardship in LTCFs has also been identified and is  
34 recommended as an area to address in future interventions studies. This must become a priority for  
35 researchers in this field in order to obtain successful results in antimicrobial stewardship initiatives.  
36 It is recommended that future intervention studies incorporate behavioural theory, and  
37 standardised BCT Taxonomy, to achieve detailed feedback from participants on the successes and  
38 challenges of antimicrobial stewardship.  
39  
40  
41  
42  
43  
44  
45  
46  
47  
48  
49  
50  
51  
52  
53  
54  
55



**References:**

1. Nicolle LE. Antimicrobial resistance in long-term care facilities. *Future Microbiol.* 2012 Feb;7(2):171-4.
2. Royal College of Physicians in Ireland Policy Group on Healthcare-Associated Infection. Healthcare-associated Infections and Nursing Homes or extended care settings.: Royal College of Physicians in Ireland.
3. European Centre for Disease Prevention and Control. Point prevalence survey of healthcare-associated infections and antimicrobial use in European long-term care facilities. April–May 2013. Stockholm.2014.
4. Nicolle L, Bentley D, Garibaldi R, Neuhaus E, Smith P. Antimicrobial Use in Long Term Care Facilities. *Infect Control Hosp Epidemiol.* 2000;21(8):537-45.
5. Daneman N, Gruneir A, Bronskill SE. Prolonged antibiotic treatment in long-term care: Role of the prescriber. *JAMA Internal Medicine.* [doi: 10.1001/jamainternmed.2013.3029]. 2013;1-10.
6. Teixeira Rodrigues A, Roque F, Falcao A, Figueiras A, Herdeiro MT. Understanding physician antibiotic prescribing behaviour: a systematic review of qualitative studies. *Int J Antimicrob Agents.* 2013 Mar;41(3):203-12.
7. Tonkin-Crine S, Yardley L, Little P. Antibiotic prescribing for acute respiratory tract infections in primary care: a systematic review and meta-ethnography. *Journal of Antimicrobial Chemotherapy.* 2011 July 15, 2011.
8. Hughes C, Lapane K, Kerse N. Prescribing for older people in nursing homes: challenges for the future. *International journal of older people nursing.* 2011;6(1):63-70.
9. Colquhoun HL, Brehaut JC, Sales A, Ivers N, Grimshaw J, Michie S, et al. A systematic review of the use of theory in randomized controlled trials of audit and feedback. *Implementation science : IS.* 2013 Jun 10;8(1):66.
10. Francis JJ, O'Connor D, Curran J. Theories of behaviour change synthesised into a set of theoretical groupings: introducing a thematic series on the theoretical domains framework. *Implementation science : IS.* 2012 Apr 24;7(1):35.
11. Michie S, Atkins L, West R. *The Behaviour Change Wheel: a Guide to Designing Interventions.* Great Britain: Silverback Publishing; 2014.
12. Cane J, O'Connor D, Michie S. Validation of the theoretical domains framework for use in behaviour change and implementation research. *Implementation science : IS.* 2012;7:37.
13. Duncan EM, Francis JJ, Johnston M, Davey P, Maxwell S, McKay GA, et al. Learning curves, taking instructions, and patient safety: using a theoretical domains framework in an interview study to investigate prescribing errors among trainee doctors. *Implementation science : IS.* 2012 Sep 11;7(1):86.
14. Michie S, van Stralen MM, West R. The behaviour change wheel: a new method for characterising and designing behaviour change interventions. *Implementation science : IS.* 2011;6:42.
15. Michie S, Richardson M, Johnston M, Abraham C, Francis J, Hardeman W, et al. The behavior change technique taxonomy (v1) of 93 hierarchically clustered techniques: building an international consensus for the reporting of behavior change interventions. *Ann Behav Med.* 2013 Aug;46(1):81-95.
16. Schweizer AK, Hughes CM, Macauley DC, O'Neill C. Managing Urinary Tract Infections in Nursing Homes: A Qualitative Assessment. *Pharmacy World & Science.* 2005;27(3):159-65.
17. Walker S, McGeer A, Simor AE, Armstrong-Evans M, Loeb M. Why are antibiotics prescribed for asymptomatic bacteriuria in institutionalized elderly people? A qualitative study of physicians' and nurses' perceptions. *CMAJ : Canadian Medical Association journal = journal de l'Association medicale canadienne.* 2000 Aug 8;163(3):273-7.
18. Medical Research Council. *Developing and evaluating complex interventions: new guidance.*: Medical Research Council2008.

19. Richie J, Lewis J. *Qualitative Research Practice A guide for Social Science Students and Researchers*. London: Sage Publications; 2008.
20. Sandelowski M. Sample size in qualitative research. *Research in nursing & health*. 1995;18(2):179-83.
21. Pope C, Ziebland S, Mays N. Analysing qualitative data. *BMJ (Clinical research ed)*. 2000 Jan 8;320(7227):114-6.
22. QSR International Pty Ltd. NVivo Qualitative Data Analysis Software Version 10. 2012.
23. Tong, A, Sainsbury, P, Craig, J. Consolidated criteria for reporting qualitative research (COREQ): a 32-item checklist for interviews and focus groups. *Int J Qual Health Care* 2007;19(6):349-57.
24. Strategy for Antimicrobial Resistance in Ireland. Guidelines for Antimicrobial Prescribing in Primary Care in Ireland: Health Service Executive, Health Protection Surveillance Centre.2011.
25. Health Protection Surveillance Centre. HPSC Publications. 2013 [cited 2013 9 July]; Available from: <http://www.hpsc.ie/hpsc/Publications/>.
26. Institute for Healthcare Improvement. Raising the bar with bundles: treating patients with an all-or-nothing standard.2006: Available from: [www.ihl.org/IHI/Topics/CriticalCare/IntensiveCare/Literature/RaisingtheBarwithBundles.htm](http://www.ihl.org/IHI/Topics/CriticalCare/IntensiveCare/Literature/RaisingtheBarwithBundles.htm).
27. Broom A, Broom J, Kirby E. Cultures of resistance? A Bourdieusian analysis of doctors' antibiotic prescribing. *Social science & medicine* (1982). 2014 Jun;110:81-8.
28. Charani E, Castro-Sanchez E, Sevdalis N, Kyratsis Y, Drumright L, Shah N, et al. Understanding the Determinants of Antimicrobial Prescribing Within Hospitals: The Role of "Prescribing Etiquette". *Clinical infectious diseases : an official publication of the Infectious Diseases Society of America*. 2013 May 7.
29. Davey P, Brown E, Charani E, Fenelon L, Gould IM, Holmes A, et al. Interventions to improve antibiotic prescribing practices for hospital inpatients. *Cochrane Database of Systematic Reviews*. 2013;4.
30. Arnold SR, Straus SE. Interventions to improve antibiotic prescribing practices in ambulatory care. *Cochrane database of systematic reviews (Online)*. 2005(4):CD003539.
31. Fleming A, Browne J, Byrne S. The Effect of Interventions to Reduce Potentially Inappropriate Antibiotic Prescribing in Long-Term Care Facilities: a Systematic Review of Randomised Controlled Trials. *Drugs & aging*. 2013 Feb 27.
32. Tjia J, Gurwitz JH, Briesacher BA. Challenge of changing nursing home prescribing culture. *The American journal of geriatric pharmacotherapy*. 2012 Feb;10(1):37-46.
33. Hughes CM, Lapane K, Watson MC, Davies HT. Does organisational culture influence prescribing in care homes for older people? A new direction for research. *Drugs & aging*. 2007;24(2):81-93.
34. Cabana Md RCSPNR, et al. Why don't physicians follow clinical practice guidelines?: A framework for improvement. *JAMA : the journal of the American Medical Association*. [doi: 10.1001/jama.282.15.1458]. 1999;282(15):1458-65.
35. SARI Hospital antimicrobial stewardship working group. Guidelines for antimicrobial stewardship in hospitals in Ireland2009: Available from: <http://www.hpsc.ie/hpsc/A-Z/MicrobiologyAntimicrobialResistance/InfectionControlandHAI/Guidelines/File,4116.en.pdf>.
36. Health Information and Quality Authority. National Quality Standards for Residential Care Settings for Older People Ireland, : Health Information and Quality Authority,2008.
37. Pharmaceutical Society of Ireland. Guidance on the supply by Pharmacists in retail pharmacy businesses of medicines to patients in residential care settings/nursing homes2014.
38. Health Information and Quality Authority. Draft National Standards for Residential Care Settings for Older People in Ireland HIQA.2014 July

1  
2  
3  
4  
5  
6  
7  
8  
9  
10  
11  
12  
13  
14  
15  
16  
17  
18  
19  
20  
21  
22  
23  
24  
25  
26  
27  
28  
29  
30  
31  
32  
33  
34  
35  
36  
37  
38  
39  
40  
41  
42  
43  
44  
45  
46  
47  
48  
49  
50  
51  
52  
53  
54  
55  
56  
57  
58  
59  
60

**Acknowledgements:**

AF conceived the study, conducted the interviews and the analysis and wrote the first draft of the manuscript. SB, CB and SC were involved in the analysis and interpretation of the data. All authors read and approved the final manuscript. Our thanks to the Doctors, Nurses and Pharmacists who agreed to be interviewed for this study. The support of University College London Centre for Behaviour Change Summer School 2014 is kindly acknowledged.

For peer review only

**Supplementary material:****Table A: Consolidated criteria for reporting qualitative studies (COREQ) checklist.**

| <b>Domain 1 : Research team and reflexivity</b>         |                                                                                            |
|---------------------------------------------------------|--------------------------------------------------------------------------------------------|
| <b>Personal characteristics</b>                         |                                                                                            |
| 1. Interviewer                                          | Primary author AF.                                                                         |
| 2. Credentials                                          | PhD Scholar, Pharmacist                                                                    |
| 3. Occupation                                           | PhD Scholar, Pharmacist                                                                    |
| 4. Gender                                               | Female                                                                                     |
| 5. Experience & training                                | Training in qualitative research methods                                                   |
| <b>Relationship with participants</b>                   |                                                                                            |
| 6. Relationship established prior to study commencement | No                                                                                         |
| 7. Participant knowledge of the interviewer             | Yes in a minority of cases (2 GPs, 1 Pharmacist).                                          |
| 8. Interviewer characteristics                          | This was not addressed.                                                                    |
| <b>Domain 2: Study design</b>                           |                                                                                            |
| <b>Theoretical framework</b>                            |                                                                                            |
| 9. Methodological orientation & theory                  | Thematic content analysis mapped to the TDF*.                                              |
| <b>Participant selection</b>                            |                                                                                            |
| 10. Sampling                                            | Convenience sampling with maximum variation                                                |
| 11. Method of approach                                  | Telephone invitation                                                                       |
| 12. Sample size                                         | 37 in total                                                                                |
| 13. Non-participation                                   | Did not arise                                                                              |
| 14. Setting of data collection                          | LCTF, GP surgery, Consultant office, Pharmacy                                              |
| 15. Presence of non-participants                        | No                                                                                         |
| 16. Description of sample                               | Outlined in Supplementary material Table A                                                 |
| <b>Data collection</b>                                  |                                                                                            |
| 17. Interview guide                                     | Topic guide drafted, piloted and revised                                                   |
| 18. Repeat interviews                                   | No repeat interviews were conducted                                                        |
| 19. Audio/visual recording                              | Interviews were audio-recorded                                                             |
| 20. Field notes                                         | Recorded after interviews                                                                  |
| 21. Duration                                            | Reported; mean 22mins, range 10-35 mins                                                    |
| 22. Data saturation                                     | Sampling continued until data saturation                                                   |
| 23. Transcripts returned                                | Transcripts were available to participants on request                                      |
| <b>Domain 3: analysis and findings</b>                  |                                                                                            |
| <b>Data analysis</b>                                    |                                                                                            |
| 24. Number of data coders                               | Outlined in the text, four in total                                                        |
| 25. Description of coding tree                          | A coding tree was not developed, themes were mapped to the TDF.                            |
| 26. Derivation of themes                                | Themes were derived from the data by thematic content analysis and then mapped to the TDF. |
| 27. Software                                            | NVivo Qualitative Data Analysis Software version 10.                                       |
| 28. Participant checking                                | This was not conducted                                                                     |
| <b>Reporting</b>                                        |                                                                                            |
| 29. Quotations presented                                | Supporting quotations presented                                                            |
| 30. Data and findings consistent                        | Yes                                                                                        |
| 31. Clarity of major themes                             | A clear presentation of major themes is outlined                                           |
| 32. Clarity of minor themes                             | Variations in views and themes and minor themes are presented.                             |

\*TDF = Theoretical Domains Framework.
